# Supplementary material for: Early intrinsic hyperexcitability does not contribute to motoneuron degeneration in amyotrophic lateral sclerosis
Source: eLife. 2014 Oct 14;3:e04046. doi: 10.7554/eLife.04046 (PMC4227046; doi:10.7554/eLife.04046)
Supplement: Supplementary file 1. — Each sheet begins with a description of the properties measured and where they are displayed in the article. DOI: http://dx.doi.org/10.7554/eLife.04046.015 [file elife-04046-supp1.xlsx]

## Sheet: Gin, Ion, Ith, Vth, Soma, RMP
This table displays source data used for Table 1 (Gin, Ion, Rheobase, Vth and RMP), Table 2 (Soma Area) and Figure 6 B1 and B2 (Gin and Rheobase)
Note voltage data are not corrected for liquid junction potential
Firing pattern	SOD1	Age	Soma Area (μm²)	Gin (nS)	Ion (pA)	Rheobase (pA)	Vth for spiking (mV)	Resting Potential (mV)
delayed	+/+	7	688.5	29.9	1307.67	1200	-24	-66
delayed	+/+	11	532.1	37	n/a	600	-34	-62
delayed	+/+	8	539	70.9	469	1000	-36	-60
delayed	+/+	8	895.5	87	1129.67	1400	-45	-60
delayed	+/+	8	975.9	86.2	1208	1900	-42	-61
delayed	+/+	9	717.2	43.3	553	1200	-37	-66
delayed	+/+	6	404	26.7	829.67	800	-31	-64
delayed	+/+	7	456.6	51.3	1448.67	1100	-42	-64
delayed	+/+	8	537.2	99	2409.67	2000	-29	-56
delayed	+/+	8	n/a	35.8	540.33	800	-36	-63
delayed	+/+	9	579.8	40.8	933.33	1400	-35	-68
delayed	+/+	10	688.417	35.2113	634	700	-28	-60.5
delayed	+/+	8	730.9	69.9	880	2000	-27	-66
delayed	+/+	8	876.1	93.5	n/a	1400	-26	-68
delayed	+/+	7	692.6	70.9	1586.5	1900	-31.8	-67.5
delayed	+/+	9	729.4	76.9	n/a	2000	-30	-65.7
delayed	+/+	9	398.4	54.1	915.67	1200	-30	-66
delayed	+/+	9	710	19.2	358.67	600	-20.6	-69.3
delayed	+/+	9	601.9	69.9	1631.33	1000	-41.7	-67.5
delayed	+/+	6	714.3	74.6	2292.67	2400	-28.4	-63.5
delayed	+/+	6	691.8	78.1	2461.5	2800	-28.2	-65.2
delayed	+/+	10	471.074	26.3158	n/a	700	-38	-70
delayed	+/+	6	737.4	18.1	448	600	-38.2	-70.3
delayed	+/+	8	974	90.1	n/a	n/a	n/a	-65
delayed	+/+	8	n/a	45.2	n/a	1900	-29.3	-62
delayed	+/+	8	539.8	37.9	2011.33	2200	-41.1	-60.2
delayed	+/+	8	671.5	30.3	1853.67	1300	-20.4	-65.3
delayed	+/+	8	576.5	73	1021.67	1400	-35.5	-61.6
delayed	+/+	6	384.8	43.7	1092	1000	-37.8	-70.3
delayed	+/+	9	827.376	32.7869	n/a	300	-25	-58.6
delayed	+/+	8	846.6	40.7	n/a	400	-47	-61
delayed	+/+	7	384.66	10	425	500	-28	-67
delayed	+/+	7	733.64	19.3	159	750	-43.8	-63.6
delayed	+/+	9	620.29	35	1569	1500	-19	-61.6
delayed	+/+	8	585.69	40	686	650	-41	-60.9
delayed	+/+	9	487.42	27.3	782	700	-35.1	-60.3
delayed	+/+	7	459.76	25.8	323	1000	-36.9	-68
delayed	+/+	9	848.4	24.1	447.33	600	-23.9	-69.3
delayed	+/+	9	512.87	26.7	549	n/a	-25.1	-62.3
delayed	+/+	9	488.22	27.5	149	350	-43.9	-65.5
delayed	+/+	8	536.03	22.2	233	500	-36.7	-62.6
delayed	+/+	7	503.81	45	665	800	-33	-59.9
delayed	+/+	7	499.64	39.4	n/a	900	-30	-65
delayed	+/+	5	618.26	61.3	1937	1100	-40	-61.6
delayed	+/+	7	470.95	41.5	472	400	-45.8	-63
delayed	+/+	6	518.86	69.4	n/a	n/a	-27.5	-65
delayed	+/+	6	n/a	47.2	n/a	n/a	n/a	-58
delayed	+/+	6	540.01	78.7	n/a	n/a	n/a	-65
delayed	+/+	11	580.45	57.8	1506.33	1600	-16.8	-64.9
delayed	+/+	7	806.85	61.3	1178	1100	-32.2	-60.3
delayed	+/+	7	742.89	52.6	1432.67	1600	-40	-68.2
delayed	+/+	5	800.07	47.4	739	900	-32.6	-65
delayed	+/+	9	565.02	52.9	1395.67	2600	n/a	-65
delayed	+/+	9	609.02	82	1288	1400	-38.5	-60.9
delayed	+/+	4	513.31	36.2	1288	1400	-35.7	-60.2
delayed	+/+	5	709.59	24.2	829	n/a	-27	-59.4
delayed	+/+	8	998.59	87	1891	1900	-32.4	-65.7
delayed	+/+	7	352.47	22.9	525	600	-35.9	-68.7
delayed	+/+	5	548.78	25.6	1034	1100	-22.5	-69
delayed	+/+	5	760.4	92.6	816	1000	-41.7	-61.4
delayed	+/+	6	762	151.5	2876	n/a	-30.7	-60.8
delayed	+/+	7	384	123	1598	1600	-28	-67
delayed	+/+	6	542.66	17.3	414	400	-21.5	-61.4
Firing pattern	SOD1	Age	Soma Area (μm²)	Gin (nS)	Ion (pA)	Rheobase (pA)	Vth for spiking (mV)	Resting Potential (mV)
delayed	+/-	9	754.92	90.9091	1134	600	-50	-66
delayed	+/-	9	560.15	33.3333	1053	1200	-33	-59
delayed	+/-	7	672.92	43.7	380	900	-11	-64
delayed	+/-	7	549.63	76.9	1531	1200	-35	-63.3
delayed	+/-	10	851.49	42.6	803	1050	-31.8	-59
delayed	+/-	8	510.43	48.5	745	600	-31.4	-60.1
delayed	+/-	8	270.7	25.2	805	1000	-26.6	-66
delayed	+/-	8	398.33	22.1	n/a	900	-30	-65.2
delayed	+/-	8	729.46	55.2	1166	900	-28.6	-67.3
delayed	+/-	8	546.75	85.5	2077	2600	-34.5	-70
delayed	+/-	7	705.76	52.9	1520	1100	-38	-63
delayed	+/-	7	748.81	49.8	1117	1400	-43	-65
delayed	+/-	7	632.06	49.3	1717	1600	-14.4	-64.6
delayed	+/-	7	639.81	29.9	1784	2200	-11.6	-63
delayed	+/-	6	n/a	86.2	n/a	1400	-46.3	-60
delayed	+/-	5	570.6	25.8	919.67	900	-27.5	-68
delayed	+/-	5	550.8	49.8	1055.33	1100	-37.6	-67.2
delayed	+/-	10	886.4	81.3	1139.67	1200	-37.2	-61
delayed	+/-	10	641	60.2	799.67	1000	-36.1	-64.8
delayed	+/-	8	490.8	21.6	428	500	-37.2	-68.4
delayed	+/-	8	588.7	21.8	529.67	500	-34.9	-65.8
delayed	+/-	7	536.9	26.8	846	500	-30	-66
delayed	+/-	10	686.4	76.9	1824.67	1600	-24.7	-62.4
delayed	+/-	10	888.3	90.9	1349	1500	-31.4	-66
delayed	+/-	10	534.9	83.3	987	1100	-38	-70
delayed	+/-	9	827.5	69.9	960	800	-28	-67
delayed	+/-	9	478	28.1	298	300	-41	-63
delayed	+/-	8	400.9	23.4	469.33	400	-10	-64
delayed	+/-	8	621.3	23.5	367.67	500	-37	-68
delayed	+/-	5	589.1	153.8	2533.33	n/a	-39.6	-66.5
delayed	+/-	8	738.2	41	891.33	1100	-21	-68
Firing pattern	SOD1	Age	Soma Area (μm²)	Gin (nS)	Ion (pA)	Rheobase (pA)	Vth for spiking (mV)	Resting Potential (mV)
immediate	+/+	9	332.4	39.4	868	1200	-42	-67
immediate	+/+	7	471.91	25.8	255	200	-45.5	-60
immediate	+/+	9	581.78	21.6	349	300	-42.5	-64
immediate	+/+	9	578.63	8	132	150	-37	-67.4
immediate	+/+	7	709.12	20.3	371	400	-34	-65
immediate	+/+	7	371.94	10.4	307	350	-52	-67
immediate	+/+	5	629.25	26.3	566	700	-49	-66
immediate	+/+	5	701.6	5.7	67	250	-46	-68
immediate	+/+	7	374.43	7.1	149	150	-52	-60
immediate	+/+	10	407.76	69.4	810	500	-60	-69
immediate	+/+	7	680.45	29.5	n/a	n/a	n/a	-67
immediate	+/+	9	444.8	6.9	137	150	-39	-63
immediate	+/+	6	597.31	42.9	669	900	-56	-67
immediate	+/+	8	279.25	24.3	n/a	400	-47	-59
immediate	+/+	8	256.06	12	376	350	-40	-69
immediate	+/+	8	297.04	34.1	506	700	-40	-65
immediate	+/+	8	433.73	51.5	1038	1200	-38	-60
immediate	+/+	6	758.28	98	698	1000	-41	-62.1
immediate	+/+	6	942.43	53.5	491	600	-48	-63
immediate	+/+	5	674.08	73.5	1338	1600	-45	-69
immediate	+/+	5	857.62	13.3	n/a	150	-51	-68
immediate	+/+	8	355.61	29.2	n/a	1400	-44	-71
immediate	+/+	6	692.6	11	233	300	-26	-61
immediate	+/+	8	731.5	33.8	1520	500	-49	-65
immediate	+/+	7	445.36	21.5	n/a	600	-51	-66
immediate	+/+	6	668.73	89.3	1965	n/a	-38	-65.1
immediate	+/+	5	299.04	17.6	243	50	-53	-62
immediate	+/+	5	638	60.2	1216	1100	-45.5	-62
immediate	+/+	5	391.28	20	388	500	-44.2	-65
immediate	+/+	5	425.12	39.4	n/a	700	-38.8	-61
immediate	+/+	8	493.27	35.5	797.67	800	-43	-66
Firing pattern	SOD1	Age	Soma Area (μm²)	Gin (nS)	Ion (pA)	Rheobase (pA)	Vth for spiking (mV)	Resting Potential (mV)
immediate	+/-	9	495.351	45.4545	979	500	-40	-60
immediate	+/-	7	401.23	42.4	n/a	100	-55	-62.1
immediate	+/-	7	437.42	6.3	119	250	-48	-63
immediate	+/-	7	429.21	11.2	274	100	-41	-61
immediate	+/-	6	305.32	28.1	269	500	-50	-66
immediate	+/-	9	545.7	44.4	172	200	-45	-62
immediate	+/-	9	640.82	25.7	186	150	-41	-61.2
immediate	+/-	10	274.73	17.5	77	250	-47	-62.5
immediate	+/-	10	582.97	42.6	1007	n/a	-47	-63.6
immediate	+/-	8	n/a	10.1	69	150	-59.6	-70
immediate	+/-	8	459.78	42.6	103	250	-56.2	-62.6
immediate	+/-	8	390.2	31.9	n/a	550	-47.6	-65
immediate	+/-	7	551.96	48.8	n/a	n/a	-54	-65
immediate	+/-	7	473.26	51.5	736	500	-44	-65
immediate	+/-	7	250	12.9	103	150	n/a	-67.5
immediate	+/-	8	497.3	43.7	316	300	-55	-64.6
immediate	+/-	10	586.1	20.1	440.67	400	-52	-63
immediate	+/-	8	410	62.5	176	200	-51.4	-60

## Sheet: Action Potential
This table displays source data used for Table 1 (Action potential amplitude, width and AHP relaxation time constant)
Note voltage data are not corrected
Type	SOD	Age	Action Potential amplitude (mV)	Action potential width (ms)	AHP relaxation time constant (ms)
delayed	+/+	9	72.1	0.94	30.1
delayed	+/+	8	70.8	2.31	n/a
delayed	+/+	7	105.4	2.05	37.4
delayed	+/+	7	81.8	2.2	41.8
delayed	+/+	7	92.7	2.18	49.9
delayed	+/+	9	76.5	1.96	29
delayed	+/+	7	78.7	2.5	n/a
delayed	+/+	9	70	2.46	n/a
delayed	+/+	8	82.8	1.44	26.5
delayed	+/+	7	80.8	1.62	n/a
delayed	+/+	5	98.8	0.85	25.3
delayed	+/+	8	85.6	0.99	17.3
delayed	+/+	6	66.4	1.72	30.8
delayed	+/+	11	99.4	0.7	26.3
delayed	+/+	7	94.3	0.66	23.3
delayed	+/+	7	94.9	0.75	18.8
delayed	+/+	6	69.7	1.22	20
delayed	+/+	9	86.8	0.8	16
delayed	+/+	9	91.6	0.83	15.9
delayed	+/+	4	101.1	1.02	32.8
delayed	+/+	6	95.4	1.4	n/a
delayed	+/+	5	96.9	1.07	31.1
delayed	+/+	5	108	1.32	32.9
delayed	+/+	8	93.4	1.19	30.3
delayed	+/+	6	104	1.49	24.8
delayed	+/+	6	121.1	1.22	n/a
delayed	+/+	7	101.7	1.26	n/a
delayed	+/+	5	75.6	1.61	11.3
delayed	+/+	5	88.4	1.53	n/a
Type	SOD	Age	Action Potential amplitude (mV)	Action potential width (ms)	AHP relaxation time constant (ms)
delayed	+/-	7	92	1.71	25
delayed	+/-	7	76.7	1.22	n/a
delayed	+/-	7	79.3	1.55	n/a
delayed	+/-	6	83.7	1.64	n/a
delayed	+/-	8	110.1	1.01	n/a
delayed	+/-	8	111.1	0.83	n/a
delayed	+/-	10	85.3	1.64	26.4
delayed	+/-	10	92.3	1.58	16.4
delayed	+/-	10	89.5	0.58	14.7
delayed	+/-	5	78.1	1.31	33.9
delayed	+/-	8	89.9	1.25	n/a
delayed	+/-	8	74.6	2.21	n/a
delayed	+/-	5	72.2	1.62	24.7
delayed	+/-	8	98.6	1.1	28.6
delayed	+/-	8	96.2	0.74	20.6
delayed	+/-	7	94	0.79	22
delayed	+/-	7	78.7	0.94	21.6
delayed	+/-	7	81.3	2.04	18.2
delayed	+/-	6	71.2	1	25.9
type	SOD	age	AP amplitude (mV)	half-AP duration (ms)	tauAHP (ms)
immediate	+/+	9	74.8	1.46	n/a
immediate	+/+	9	80.4	2.34	n/a
immediate	+/+	9	87.2	n/a	n/a
immediate	+/+	7	76.4	2.87	60.2
immediate	+/+	7	71.5	2.3	57.8
immediate	+/+	7	99.6	2.09	n/a
immediate	+/+	6	82.8	1.53	42.4
immediate	+/+	8	65.9	1.95	n/a
immediate	+/+	8	103.7	1.32	n/a
immediate	+/+	8	92.2	1.31	20.9
immediate	+/+	8	87.9	1.51	43.4
immediate	+/+	6	72.9	1.95	n/a
immediate	+/+	6	77	1.43	24.2
immediate	+/+	5	80	1.82	46.1
immediate	+/+	8	103.1	2.09	n/a
immediate	+/+	7	75.4	n/a	n/a
immediate	+/+	8	96.2	1.64	53.8
immediate	+/+	5	90.6	1.29	44.1
immediate	+/+	5	73.9	1.13	28.6
immediate	+/+	5	94.9	1.2	37
immediate	+/+	5	81.3	1.62	n/a
type	SOD	age	AP amplitude (mV)	half-AP duration (ms)	tauAHP (ms)
immediate	+/-	7	97.2	2.16	85.5
immediate	+/-	7	105.8	1.69	91
immediate	+/-	7	81.3	1.73	25.2
immediate	+/-	6	75.8	2.24	n/a
immediate	+/-	9	86.5	1.18	26.6
immediate	+/-	10	73.9	3.12	n/a
immediate	+/-	10	110	0.9	50.7
immediate	+/-	10	73	1.63	n/a
immediate	+/-	8	62	1.69	n/a
immediate	+/-	7	61.3	2.48	n/a
immediate	+/-	5	79.7	1.13	19.2
immediate	+/-	8	82.1	1.35	41
immediate	+/-	6	62	2.03	n/a

## Sheet: Dendritic paths
This table displays source data (dendritic paths) used for Table 2 and figure 8C
MN	mutation	type	Tree	Termination	Branch Order	Distance (µm)
2012-03-28 MN2	WT	immediate	1	N	3	197.9
2012-03-28 MN2	WT	immediate	1	N	3	203
2012-03-28 MN2	WT	immediate	1	N	3	226.7
2012-03-28 MN2	WT	immediate	1	N	3	207
2012-03-28 MN2	WT	immediate	2	N	2	264.4
2012-03-28 MN2	WT	immediate	2	N	3	162.4
2012-03-28 MN2	WT	immediate	2	N	3	228.2
2012-03-28 MN2	WT	immediate	3	N	2	98.3
2012-03-28 MN2	WT	immediate	3	N	2	243.4
2012-03-28 MN2	WT	immediate	4	N	3	212.7
2012-03-28 MN2	WT	immediate	4	N	3	204.1
2012-03-28 MN2	WT	immediate	4	N	2	222.7
2012-03-28 MN2	WT	immediate	5	N	4	241.8
2012-03-28 MN2	WT	immediate	5	N	4	216
2012-03-28 MN2	WT	immediate	5	N	4	199.8
2012-03-28 MN2	WT	immediate	5	N	4	222.9
2012-03-28 MN2	WT	immediate	5	N	2	283.7
2012-03-28 MN2	WT	immediate	6	N	3	236.3
2012-03-28 MN2	WT	immediate	6	N	3	148
2012-03-28 MN2	WT	immediate	6	N	2	145.6
2012-03-28 MN2	WT	immediate	7	N	2	257.8
2012-03-28 MN2	WT	immediate	7	N	2	289.6
2012-03-28 MN2	WT	immediate	8	N	1	216.6
2012-03-28 MN2	WT	immediate	9	N	3	194.2
2012-03-28 MN2	WT	immediate	9	N	3	163.2
2012-03-28 MN2	WT	immediate	9	N	3	195.7
2012-03-28 MN2	WT	immediate	9	N	3	199.5
2012-04-04 MN3	WT	delayed	1	N	2	157.7
2012-04-04 MN3	WT	delayed	1	N	4	216.7
2012-04-04 MN3	WT	delayed	1	N	4	445.9
2012-04-04 MN3	WT	delayed	1	N	3	116.2
2012-04-04 MN3	WT	delayed	2	N	2	478.4
2012-04-04 MN3	WT	delayed	2	N	2	95.1
2012-04-04 MN3	WT	delayed	3	N	7	338.6
2012-04-04 MN3	WT	delayed	3	N	9	364.5
2012-04-04 MN3	WT	delayed	3	N	9	436.7
2012-04-04 MN3	WT	delayed	3	N	8	282.8
2012-04-04 MN3	WT	delayed	3	N	7	428.2
2012-04-04 MN3	WT	delayed	3	N	7	404.3
2012-04-04 MN3	WT	delayed	3	N	5	316.4
2012-04-04 MN3	WT	delayed	3	N	4	446.8
2012-04-04 MN3	WT	delayed	3	N	3	302.6
2012-04-04 MN3	WT	delayed	3	N	2	251.3
2012-04-04 MN3	WT	delayed	4	N	2	52.6
2012-04-04 MN3	WT	delayed	4	N	4	286.6
2012-04-04 MN3	WT	delayed	4	N	6	315.8
2012-04-04 MN3	WT	delayed	4	N	7	329.8
2012-04-04 MN3	WT	delayed	4	N	7	424.4
2012-04-04 MN3	WT	delayed	4	N	4	342.2
2012-04-04 MN3	WT	delayed	4	N	5	406.2
2012-04-04 MN3	WT	delayed	4	N	5	402.5
2012-04-04 MN3	WT	delayed	5	N	3	266.7
2012-04-04 MN3	WT	delayed	5	N	3	236.6
2012-04-04 MN3	WT	delayed	5	N	2	70.8
2012-04-04 MN3	WT	delayed	6	N	2	18.3
2012-04-04 MN3	WT	delayed	6	N	2	19.4
2012-04-04 MN3	WT	delayed	7	N	1	114.2
2012-04-04 MN3	WT	delayed	8	N	4	439.2
2012-04-04 MN3	WT	delayed	8	N	4	90.2
2012-04-04 MN3	WT	delayed	8	N	4	250.1
2012-04-04 MN3	WT	delayed	8	N	4	277.8
2012-04-04 MN3	WT	delayed	8	N	2	27.7
2012-04-04 MN9	WT	delayed	1	N	6	295.6
2012-04-04 MN9	WT	delayed	1	N	9	317
2012-04-04 MN9	WT	delayed	1	N	9	319.4
2012-04-04 MN9	WT	delayed	1	N	8	365.4
2012-04-04 MN9	WT	delayed	1	N	7	410.8
2012-04-04 MN9	WT	delayed	1	N	5	326.8
2012-04-04 MN9	WT	delayed	1	N	5	254.7
2012-04-04 MN9	WT	delayed	1	N	5	253.8
2012-04-04 MN9	WT	delayed	1	N	5	147.5
2012-04-04 MN9	WT	delayed	1	N	5	229.5
2012-04-04 MN9	WT	delayed	1	N	6	392.5
2012-04-04 MN9	WT	delayed	1	N	6	400.7
2012-04-04 MN9	WT	delayed	1	N	5	386.6
2012-04-04 MN9	WT	delayed	1	N	4	360.5
2012-04-04 MN9	WT	delayed	1	N	5	400.2
2012-04-04 MN9	WT	delayed	1	N	5	435
2012-04-04 MN9	WT	delayed	1	N	4	257.8
2012-04-04 MN9	WT	delayed	1	N	5	359.7
2012-04-04 MN9	WT	delayed	1	N	5	321.1
2012-04-04 MN9	WT	delayed	2	N	3	94.4
2012-04-04 MN9	WT	delayed	2	N	3	323
2012-04-04 MN9	WT	delayed	2	N	3	174.1
2012-04-04 MN9	WT	delayed	2	N	4	195.1
2012-04-04 MN9	WT	delayed	2	N	4	185.1
2012-04-04 MN9	WT	delayed	3	N	3	155.2
2012-04-04 MN9	WT	delayed	3	N	5	304.3
2012-04-04 MN9	WT	delayed	3	N	5	313.2
2012-04-04 MN9	WT	delayed	3	N	5	275.1
2012-04-04 MN9	WT	delayed	3	N	6	343
2012-04-04 MN9	WT	delayed	3	N	7	334.1
2012-04-04 MN9	WT	delayed	3	N	7	378.6
2012-04-04 MN9	WT	delayed	3	N	2	170.9
2012-04-04 MN9	WT	delayed	4	N	1	102.5
2012-04-04 MN9	WT	delayed	5	N	4	426.5
2012-04-04 MN9	WT	delayed	5	N	4	429.3
2012-04-04 MN9	WT	delayed	5	N	3	380.8
2012-04-04 MN9	WT	delayed	5	N	3	380.8
2012-04-04 MN9	WT	delayed	5	N	4	393.8
2012-04-04 MN9	WT	delayed	5	N	4	376
2012-04-04 MN9	WT	delayed	6	N	4	430.1
2012-04-04 MN9	WT	delayed	6	N	5	465.6
2012-04-04 MN9	WT	delayed	6	N	5	423
2012-04-04 MN9	WT	delayed	6	N	5	338.1
2012-04-04 MN9	WT	delayed	6	N	5	303.8
2012-04-04 MN9	WT	delayed	6	N	5	308.5
2012-04-04 MN9	WT	delayed	6	N	6	310.9
2012-04-04 MN9	WT	delayed	6	N	6	326.6
2012-04-04 MN9	WT	delayed	6	N	3	326.6
2012-04-04 MN9	WT	delayed	6	N	3	338.7
2012-04-04 MN9	WT	delayed	6	N	4	243.8
2012-04-04 MN9	WT	delayed	6	N	5	298.1
2012-04-04 MN9	WT	delayed	6	N	6	252.2
2012-04-04 MN9	WT	delayed	6	N	6	328.6
2012-04-04 MN9	WT	delayed	6	N	3	310.4
2012-04-04 MN9	WT	delayed	7	N	2	19.2
2012-04-04 MN9	WT	delayed	7	N	2	31.4
2012-04-06 MN4	WT	delayed	1	N	2	125.5
2012-04-06 MN4	WT	delayed	1	N	3	241
2012-04-06 MN4	WT	delayed	1	N	4	342.5
2012-04-06 MN4	WT	delayed	1	N	4	327.4
2012-04-06 MN4	WT	delayed	2	N	2	398.2
2012-04-06 MN4	WT	delayed	2	N	4	275.1
2012-04-06 MN4	WT	delayed	2	N	4	308.6
2012-04-06 MN4	WT	delayed	2	N	4	52.9
2012-04-06 MN4	WT	delayed	2	N	4	115.4
2012-04-06 MN4	WT	delayed	3	N	3	447
2012-04-06 MN4	WT	delayed	3	N	4	160.8
2012-04-06 MN4	WT	delayed	3	N	3	342.1
2012-04-06 MN4	WT	delayed	3	N	3	322.8
2012-04-06 MN4	WT	delayed	4	N	3	264.1
2012-04-06 MN4	WT	delayed	4	N	3	322.3
2012-04-06 MN4	WT	delayed	4	N	3	325
2012-04-06 MN4	WT	delayed	4	N	5	157.8
2012-04-06 MN4	WT	delayed	4	N	7	497.2
2012-04-06 MN4	WT	delayed	4	N	7	400.7
2012-04-06 MN4	WT	delayed	4	N	7	350.1
2012-04-06 MN4	WT	delayed	4	N	7	376.8
2012-04-06 MN4	WT	delayed	4	N	5	170.4
2012-04-06 MN4	WT	delayed	4	N	6	320.4
2012-04-06 MN4	WT	delayed	4	N	7	338.2
2012-04-06 MN4	WT	delayed	4	N	7	215.8
2012-04-06 MN4	WT	delayed	5	N	3	163.4
2012-04-06 MN4	WT	delayed	5	N	3	130.1
2012-04-06 MN4	WT	delayed	5	N	4	332.9
2012-04-06 MN4	WT	delayed	5	N	4	334.2
2012-04-06 MN4	WT	delayed	5	N	3	216.6
2012-04-06 MN4	WT	delayed	6	N	6	345
2012-04-06 MN4	WT	delayed	6	N	6	316.3
2012-04-06 MN4	WT	delayed	6	N	5	152.5
2012-04-06 MN4	WT	delayed	6	N	6	251.9
2012-04-06 MN4	WT	delayed	6	N	6	355.8
2012-04-06 MN4	WT	delayed	6	N	9	336.8
2012-04-06 MN4	WT	delayed	6	N	9	335.4
2012-04-06 MN4	WT	delayed	6	N	7	404.5
2012-04-06 MN4	WT	delayed	6	N	4	198.3
2012-04-06 MN4	WT	delayed	6	N	7	316
2012-04-06 MN4	WT	delayed	6	N	7	322.3
2012-04-06 MN4	WT	delayed	6	N	6	271.8
2012-04-06 MN4	WT	delayed	6	N	6	359.1
2012-04-06 MN4	WT	delayed	6	N	6	276.8
2012-04-06 MN4	WT	delayed	6	N	4	280.6
2012-04-06 MN4	WT	delayed	6	N	5	322.8
2012-04-06 MN4	WT	delayed	6	N	5	395.6
2012-04-06 MN4	WT	delayed	6	N	3	135.7
2012-04-06 MN4	WT	delayed	6	N	5	331.5
2012-04-06 MN4	WT	delayed	6	N	5	350.8
2012-04-06 MN4	WT	delayed	6	N	5	354.6
2012-04-06 MN4	WT	delayed	6	N	5	165.9
2012-04-06 MN4	WT	delayed	6	N	5	402.7
2012-04-06 MN4	WT	delayed	6	N	5	276.1
2012-04-06 MN4	WT	delayed	6	N	5	389.9
2012-04-06 MN4	WT	delayed	7	N	3	139.6
2012-04-06 MN4	WT	delayed	7	N	4	281.2
2012-04-06 MN4	WT	delayed	7	N	5	321.3
2012-04-06 MN4	WT	delayed	7	N	5	344.1
2012-04-06 MN4	WT	delayed	7	N	3	382.1
2012-04-06 MN4	WT	delayed	7	N	4	304.9
2012-04-06 MN4	WT	delayed	7	N	5	308.2
2012-04-06 MN4	WT	delayed	7	N	5	286.4
2012-04-06 MN4	WT	delayed	8	N	1	61.3
2012-04-06 MN4	WT	delayed	9	N	2	28.8
2012-04-06 MN4	WT	delayed	9	N	2	369.6
2012-08-28 MN2	WT	immediate	1	N	3	205.6
2012-08-28 MN2	WT	immediate	1	N	4	281.4
2012-08-28 MN2	WT	immediate	1	N	4	260.4
2012-08-28 MN2	WT	immediate	1	N	2	279.4
2012-08-28 MN2	WT	immediate	2	N	2	165.9
2012-08-28 MN2	WT	immediate	2	N	2	127.6
2012-08-28 MN2	WT	immediate	3	N	2	213.7
2012-08-28 MN2	WT	immediate	3	N	3	306.8
2012-08-28 MN2	WT	immediate	3	N	6	302.7
2012-08-28 MN2	WT	immediate	3	N	6	300.1
2012-08-28 MN2	WT	immediate	3	N	5	207.5
2012-08-28 MN2	WT	immediate	3	N	4	220.4
2012-08-28 MN2	WT	immediate	4	N	1	52.3
2012-08-28 MN2	WT	immediate	5	N	1	241.2
2012-08-28 MN2	WT	immediate	6	N	3	204.2
2012-08-28 MN2	WT	immediate	6	N	3	279.5
2012-08-28 MN2	WT	immediate	6	N	4	196.1
2012-08-28 MN2	WT	immediate	6	N	4	107.7
2012-08-28 MN2	WT	immediate	6	N	4	237.3
2012-08-28 MN2	WT	immediate	6	N	5	225.6
2012-08-28 MN4	WT	immediate	1	N	3	71.8
2012-08-28 MN4	WT	immediate	1	N	4	564.5
2012-08-28 MN4	WT	immediate	1	N	4	401.7
2012-08-28 MN4	WT	immediate	1	N	5	625.9
2012-08-28 MN4	WT	immediate	1	N	7	504.1
2012-08-28 MN4	WT	immediate	1	N	7	536.3
2012-08-28 MN4	WT	immediate	1	N	6	417.4
2012-08-28 MN4	WT	immediate	1	N	5	605.6
2012-08-28 MN4	WT	immediate	2	N	1	59.6
2012-08-28 MN4	WT	immediate	3	N	2	554.9
2012-08-28 MN4	WT	immediate	3	N	2	536.8
2012-08-28 MN4	WT	immediate	4	N	1	360.6
2012-08-28 MN4	WT	immediate	5	N	2	269.6
2012-08-28 MN4	WT	immediate	5	N	3	513.5
2012-08-28 MN4	WT	immediate	5	N	4	472.7
2012-08-28 MN4	WT	immediate	5	N	4	457.7
2012-09-04 MN2	SOD	immediate	1	N	5	546.9
2012-09-04 MN2	SOD	immediate	1	N	6	530.1
2012-09-04 MN2	SOD	immediate	1	N	6	534.9
2012-09-04 MN2	SOD	immediate	1	N	4	92.1
2012-09-04 MN2	SOD	immediate	1	N	3	177.3
2012-09-04 MN2	SOD	immediate	2	N	1	78
2012-09-04 MN2	SOD	immediate	3	N	4	52.4
2012-09-04 MN2	SOD	immediate	3	N	4	47
2012-09-04 MN2	SOD	immediate	3	N	4	346.7
2012-09-04 MN2	SOD	immediate	3	N	4	288.9
2012-09-04 MN2	SOD	immediate	3	N	4	330.8
2012-09-04 MN2	SOD	immediate	3	N	4	583.7
2012-09-04 MN2	SOD	immediate	3	N	6	537.5
2012-09-04 MN2	SOD	immediate	3	N	6	396.5
2012-09-04 MN2	SOD	immediate	3	N	6	365.2
2012-09-04 MN2	SOD	immediate	3	N	7	236.8
2012-09-04 MN2	SOD	immediate	3	N	7	193.7
2012-09-04 MN2	SOD	immediate	4	N	1	296.3
2012-09-04 MN4	SOD	immediate	1	N	4	201.8
2012-09-04 MN4	SOD	immediate	1	N	4	230.8
2012-09-04 MN4	SOD	immediate	1	N	3	212.6
2012-09-04 MN4	SOD	immediate	1	N	5	499.1
2012-09-04 MN4	SOD	immediate	1	N	6	505.9
2012-09-04 MN4	SOD	immediate	1	N	6	545.9
2012-09-04 MN4	SOD	immediate	1	N	4	441.3
2012-09-04 MN4	SOD	immediate	1	N	4	155.2
2012-09-04 MN4	SOD	immediate	1	N	4	160.2
2012-09-04 MN4	SOD	immediate	2	N	1	105.9
2012-09-04 MN4	SOD	immediate	3	N	1	30.2
2012-09-04 MN4	SOD	immediate	4	N	2	152.7
2012-09-04 MN4	SOD	immediate	4	N	3	608.2
2012-09-04 MN4	SOD	immediate	4	N	3	620.6
2012-09-04 MN4	SOD	immediate	6	N	3	680.5
2012-09-04 MN4	SOD	immediate	6	N	4	627
2012-09-04 MN4	SOD	immediate	6	N	4	489.5
2012-09-04 MN4	SOD	immediate	6	N	2	93.7
2012-09-04 MN4	SOD	immediate	7	N	4	373.9
2012-09-04 MN4	SOD	immediate	7	N	5	685
2012-09-04 MN4	SOD	immediate	7	N	5	563.4
2012-09-04 MN4	SOD	immediate	7	N	3	115.6
2012-09-04 MN4	SOD	immediate	7	N	3	258.3
2012-09-04 MN4	SOD	immediate	7	N	3	173.7
2012-09-04 MN4	SOD	immediate	8	N	3	92.5
2012-09-04 MN4	SOD	immediate	8	N	3	242.3
2012-09-04 MN4	SOD	immediate	8	N	4	141.2
2012-09-04 MN4	SOD	immediate	8	N	4	77.4
2012-09-04 MN4	SOD	immediate	8	N	3	70.5
2012-09-04 MN4	SOD	immediate	9	N	1	479.8
2012-09-06 MN2	SOD	immediate	1	N	3	335.1
2012-09-06 MN2	SOD	immediate	1	N	4	274
2012-09-06 MN2	SOD	immediate	1	N	4	320.7
2012-09-06 MN2	SOD	immediate	1	N	4	373.3
2012-09-06 MN2	SOD	immediate	1	N	4	397.5
2012-09-06 MN2	SOD	immediate	1	N	3	363.9
2012-09-06 MN2	SOD	immediate	2	N	2	612.8
2012-09-06 MN2	SOD	immediate	2	N	2	498.1
2012-09-06 MN2	SOD	immediate	3	N	3	380.2
2012-09-06 MN2	SOD	immediate	3	N	3	86.9
2012-09-06 MN2	SOD	immediate	3	N	2	289.4
2012-09-06 MN2	SOD	immediate	4	N	2	389.7
2012-09-06 MN2	SOD	immediate	4	N	2	441.9
2012-09-06 MN5	SOD	delayed	1	N	2	254
2012-09-06 MN5	SOD	delayed	1	N	5	285.5
2012-09-06 MN5	SOD	delayed	1	N	5	172.5
2012-09-06 MN5	SOD	delayed	1	N	4	242.2
2012-09-06 MN5	SOD	delayed	1	N	4	258.7
2012-09-06 MN5	SOD	delayed	1	N	5	330.6
2012-09-06 MN5	SOD	delayed	1	N	5	300.5
2012-09-06 MN5	SOD	delayed	2	N	3	196.2
2012-09-06 MN5	SOD	delayed	2	N	3	188.6
2012-09-06 MN5	SOD	delayed	2	N	2	312
2012-09-06 MN5	SOD	delayed	3	N	9	333.9
2012-09-06 MN5	SOD	delayed	3	N	9	364.7
2012-09-06 MN5	SOD	delayed	3	N	8	329.2
2012-09-06 MN5	SOD	delayed	3	N	7	218.4
2012-09-06 MN5	SOD	delayed	3	N	6	258.8
2012-09-06 MN5	SOD	delayed	3	N	7	335
2012-09-06 MN5	SOD	delayed	3	N	7	379.3
2012-09-06 MN5	SOD	delayed	3	N	7	370.9
2012-09-06 MN5	SOD	delayed	3	N	7	377.2
2012-09-06 MN5	SOD	delayed	3	N	4	299
2012-09-06 MN5	SOD	delayed	3	N	3	312.4
2012-09-06 MN5	SOD	delayed	3	N	3	304
2012-09-06 MN5	SOD	delayed	3	N	3	302.7
2012-09-06 MN5	SOD	delayed	4	N	4	283.1
2012-09-06 MN5	SOD	delayed	4	N	4	289.5
2012-09-06 MN5	SOD	delayed	4	N	5	469.1
2012-09-06 MN5	SOD	delayed	4	N	5	414.3
2012-09-06 MN5	SOD	delayed	4	N	5	313.7
2012-09-06 MN5	SOD	delayed	4	N	6	238.2
2012-09-06 MN5	SOD	delayed	4	N	6	221.2
2012-09-06 MN5	SOD	delayed	4	N	5	201.3
2012-09-06 MN5	SOD	delayed	4	N	6	229.2
2012-09-06 MN5	SOD	delayed	4	N	6	204.9
2012-09-06 MN5	SOD	delayed	4	N	5	180
2012-09-06 MN5	SOD	delayed	4	N	6	345.6
2012-09-06 MN5	SOD	delayed	4	N	10	459.6
2012-09-06 MN5	SOD	delayed	4	N	10	443.8
2012-09-06 MN5	SOD	delayed	4	N	9	414.6
2012-09-06 MN5	SOD	delayed	4	N	8	402.9
2012-09-06 MN5	SOD	delayed	4	N	7	391.3
2012-09-06 MN5	SOD	delayed	4	N	7	444.5
2012-09-06 MN5	SOD	delayed	4	N	7	443.9
2012-09-06 MN5	SOD	delayed	4	N	6	407.3
2012-09-06 MN5	SOD	delayed	4	N	5	386.7
2012-09-06 MN5	SOD	delayed	4	N	5	355.6
2012-09-06 MN5	SOD	delayed	5	N	3	396.9
2012-09-06 MN5	SOD	delayed	5	N	3	283.9
2012-09-06 MN5	SOD	delayed	5	N	7	354.5
2012-09-06 MN5	SOD	delayed	5	N	7	310.8
2012-09-06 MN5	SOD	delayed	5	N	6	325.1
2012-09-06 MN5	SOD	delayed	5	N	5	243.8
2012-09-06 MN5	SOD	delayed	5	N	4	233.4
2012-09-06 MN5	SOD	delayed	5	N	4	288.6
2012-09-06 MN5	SOD	delayed	5	N	4	270.5
2012-09-06 MN5	SOD	delayed	6	N	4	342.6
2012-09-06 MN5	SOD	delayed	6	N	4	220.4
2012-09-06 MN5	SOD	delayed	6	N	3	148.2
2012-09-06 MN5	SOD	delayed	6	N	4	332.7
2012-09-06 MN5	SOD	delayed	6	N	4	267
2012-09-06 MN5	SOD	delayed	6	N	3	146.4
2012-09-06 MN5	SOD	delayed	7	N	5	301.9
2012-09-06 MN5	SOD	delayed	7	N	6	409.1
2012-09-06 MN5	SOD	delayed	7	N	6	410
2012-09-06 MN5	SOD	delayed	7	N	4	205.9
2012-09-06 MN5	SOD	delayed	7	N	4	103.2
2012-09-06 MN5	SOD	delayed	7	N	9	315.4
2012-09-06 MN5	SOD	delayed	7	N	9	323.5
2012-09-06 MN5	SOD	delayed	7	N	8	295.7
2012-09-06 MN5	SOD	delayed	7	N	10	313.6
2012-09-06 MN5	SOD	delayed	7	N	11	313.5
2012-09-06 MN5	SOD	delayed	7	N	11	300.4
2012-09-06 MN5	SOD	delayed	7	N	9	259.9
2012-09-06 MN5	SOD	delayed	7	N	6	144.3
2012-09-06 MN5	SOD	delayed	7	N	6	289.4
2012-09-06 MN5	SOD	delayed	7	N	7	330.3
2012-09-06 MN5	SOD	delayed	7	N	7	245.6
2012-09-06 MN5	SOD	delayed	7	N	5	407
2012-09-06 MN5	SOD	delayed	7	N	5	423.2
2012-09-06 MN5	SOD	delayed	7	N	5	263.8
2012-09-06 MN5	SOD	delayed	7	N	5	278.2
2012-09-06 MN5	SOD	delayed	7	N	3	235
2012-09-06 MN5	SOD	delayed	8	N	1	20.6
2012-09-06 MN5	SOD	delayed	9	N	2	279.2
2012-09-06 MN5	SOD	delayed	9	N	4	375.3
2012-09-06 MN5	SOD	delayed	9	N	4	197.1
2012-09-06 MN5	SOD	delayed	9	N	4	287.5
2012-09-06 MN5	SOD	delayed	9	N	4	232.7
2012-09-06 MN5	SOD	delayed	10	N	4	189.4
2012-09-06 MN5	SOD	delayed	10	N	6	266.8
2012-09-06 MN5	SOD	delayed	10	N	6	321.9
2012-09-06 MN5	SOD	delayed	10	N	5	276.8
2012-09-06 MN5	SOD	delayed	10	N	4	343.7
2012-09-06 MN5	SOD	delayed	10	N	4	312.2
2012-09-06 MN5	SOD	delayed	10	N	3	285.2
2012-09-06 MN5	SOD	delayed	10	N	6	395.3
2012-09-06 MN5	SOD	delayed	10	N	6	298
2012-09-06 MN5	SOD	delayed	10	N	6	350.8
2012-09-06 MN5	SOD	delayed	10	N	6	270.7
2012-09-06 MN5	SOD	delayed	10	N	5	398.8
2012-09-06 MN5	SOD	delayed	10	N	5	321.8
2012-09-06 MN5	SOD	delayed	11	N	1	174.4
2012-09-13 MN1	WT	delayed	1	N	3	339.3
2012-09-13 MN1	WT	delayed	1	N	4	299.1
2012-09-13 MN1	WT	delayed	1	N	4	353.6
2012-09-13 MN1	WT	delayed	1	N	3	26.6
2012-09-13 MN1	WT	delayed	1	N	3	61.2
2012-09-13 MN1	WT	delayed	2	N	2	141.6
2012-09-13 MN1	WT	delayed	2	N	3	215.7
2012-09-13 MN1	WT	delayed	2	N	3	235.7
2012-09-13 MN1	WT	delayed	3	N	4	330.4
2012-09-13 MN1	WT	delayed	3	N	4	347.3
2012-09-13 MN1	WT	delayed	3	N	3	360.1
2012-09-13 MN1	WT	delayed	3	N	2	170.5
2012-09-13 MN1	WT	delayed	4	N	5	341.6
2012-09-13 MN1	WT	delayed	4	N	5	347.2
2012-09-13 MN1	WT	delayed	4	N	4	342.1
2012-09-13 MN1	WT	delayed	4	N	4	274.4
2012-09-13 MN1	WT	delayed	4	N	4	430.3
2012-09-13 MN1	WT	delayed	4	N	3	353.5
2012-09-13 MN1	WT	delayed	4	N	3	349.8
2012-09-13 MN1	WT	delayed	5	N	1	93.4
2012-09-13 MN1	WT	delayed	6	N	4	117.3
2012-09-13 MN1	WT	delayed	6	N	4	118.4
2012-09-13 MN1	WT	delayed	6	N	3	111.8
2012-09-13 MN1	WT	delayed	6	N	3	251.6
2012-09-13 MN1	WT	delayed	6	N	4	423.9
2012-09-13 MN1	WT	delayed	6	N	5	415.1
2012-09-13 MN1	WT	delayed	6	N	5	386.4
2012-09-13 MN1	WT	delayed	7	N	2	298.9
2012-09-13 MN1	WT	delayed	7	N	2	87.7
2012-09-13 MN1	WT	delayed	8	N	3	206.4
2012-09-13 MN1	WT	delayed	8	N	3	357.1
2012-09-13 MN1	WT	delayed	8	N	3	230.2
2012-09-13 MN1	WT	delayed	8	N	3	227.7
2012-09-13 MN1	WT	delayed	9	N	2	274
2012-09-13 MN1	WT	delayed	9	N	2	225.4
2012-09-13 MN2	WT	delayed	1	N	6	373.7
2012-09-13 MN2	WT	delayed	1	N	6	398.6
2012-09-13 MN2	WT	delayed	1	N	8	436.1
2012-09-13 MN2	WT	delayed	1	N	8	456.3
2012-09-13 MN2	WT	delayed	1	N	7	317.2
2012-09-13 MN2	WT	delayed	1	N	6	476.4
2012-09-13 MN2	WT	delayed	1	N	4	126.2
2012-09-13 MN2	WT	delayed	1	N	3	54.1
2012-09-13 MN2	WT	delayed	1	N	2	51.3
2012-09-13 MN2	WT	delayed	2	N	1	56
2012-09-13 MN2	WT	delayed	3	N	1	20.6
2012-09-13 MN2	WT	delayed	4	N	2	83.6
2012-09-13 MN2	WT	delayed	4	N	2	43.1
2012-09-13 MN2	WT	delayed	5	N	4	263
2012-09-13 MN2	WT	delayed	5	N	4	187.5
2012-09-13 MN2	WT	delayed	5	N	4	377.7
2012-09-13 MN2	WT	delayed	5	N	4	400.3
2012-09-13 MN2	WT	delayed	5	N	3	498.3
2012-09-13 MN2	WT	delayed	5	N	3	171.3
2012-09-13 MN2	WT	delayed	6	N	3	88.4
2012-09-13 MN2	WT	delayed	6	N	3	57.4
2012-09-13 MN2	WT	delayed	6	N	3	214.5
2012-09-13 MN2	WT	delayed	6	N	4	119.1
2012-09-13 MN2	WT	delayed	7	N	3	285.5
2012-09-13 MN2	WT	delayed	7	N	3	494.7
2012-09-13 MN2	WT	delayed	7	N	6	570.1
2012-09-13 MN2	WT	delayed	7	N	6	429.1
2012-09-13 MN2	WT	delayed	7	N	5	411.7
2012-09-13 MN2	WT	delayed	7	N	5	413.5
2012-09-13 MN2	WT	delayed	7	N	5	369.6
2012-09-13 MN2	WT	delayed	7	N	3	248.2
2012-09-13 MN2	WT	delayed	8	N	5	365.4
2012-09-13 MN2	WT	delayed	8	N	5	328.3
2012-09-13 MN2	WT	delayed	8	N	4	283.6
2012-09-13 MN2	WT	delayed	8	N	3	176.6
2012-09-13 MN2	WT	delayed	8	N	4	258.9
2012-09-13 MN2	WT	delayed	8	N	4	323.8
2012-09-13 MN2	WT	delayed	8	N	5	476.3
2012-09-13 MN2	WT	delayed	8	N	7	470.9
2012-09-13 MN2	WT	delayed	8	N	7	435.1
2012-09-13 MN2	WT	delayed	8	N	6	386
2012-09-13 MN2	WT	delayed	8	N	5	447.2
2012-09-13 MN2	WT	delayed	8	N	5	494.9
2012-09-13 MN2	WT	delayed	9	N	1	37.2
2012-09-13 MN2	WT	delayed	10	N	2	325.8
2012-09-13 MN2	WT	delayed	10	N	2	294.7
2012-09-13 MN4	WT	immediate	1	N	4	364.6
2012-09-13 MN4	WT	immediate	1	N	4	456.2
2012-09-13 MN4	WT	immediate	1	N	3	90.5
2012-09-13 MN4	WT	immediate	1	N	4	464.6
2012-09-13 MN4	WT	immediate	1	N	4	450.6
2012-09-13 MN4	WT	immediate	1	N	3	434.1
2012-09-13 MN4	WT	immediate	2	N	3	180.4
2012-09-13 MN4	WT	immediate	2	N	3	266.8
2012-09-13 MN4	WT	immediate	2	N	3	314.2
2012-09-13 MN4	WT	immediate	2	N	5	328.6
2012-09-13 MN4	WT	immediate	2	N	5	250.2
2012-09-13 MN4	WT	immediate	2	N	4	278.3
2012-09-13 MN4	WT	immediate	3	N	2	140.8
2012-09-13 MN4	WT	immediate	3	N	3	203.1
2012-09-13 MN4	WT	immediate	3	N	3	371.9
2012-09-13 MN4	WT	immediate	4	N	1	11.2
2012-09-13 MN4	WT	immediate	5	N	1	25.7
2012-09-13 MN4	WT	immediate	6	N	3	408.6
2012-09-13 MN4	WT	immediate	6	N	3	388.9
2012-09-13 MN4	WT	immediate	6	N	4	475.5
2012-09-13 MN4	WT	immediate	6	N	4	477.4
2012-09-13 MN4	WT	immediate	6	N	3	400.7
2012-09-13 MN4	WT	immediate	7	N	3	213
2012-09-13 MN4	WT	immediate	7	N	4	197.8
2012-09-13 MN4	WT	immediate	7	N	4	186.8
2012-09-13 MN4	WT	immediate	7	N	2	39
2012-09-13 MN4	WT	immediate	8	N	2	463.9
2012-09-13 MN4	WT	immediate	8	N	2	352
2012-09-14 MN1	SOD	delayed	1	N	3	237.9
2012-09-14 MN1	SOD	delayed	1	N	3	203.2
2012-09-14 MN1	SOD	delayed	1	N	5	158.3
2012-09-14 MN1	SOD	delayed	1	N	5	95.8
2012-09-14 MN1	SOD	delayed	1	N	4	134.8
2012-09-14 MN1	SOD	delayed	1	N	6	297.4
2012-09-14 MN1	SOD	delayed	1	N	6	402.1
2012-09-14 MN1	SOD	delayed	1	N	5	468
2012-09-14 MN1	SOD	delayed	1	N	6	150.6
2012-09-14 MN1	SOD	delayed	1	N	6	401.5
2012-09-14 MN1	SOD	delayed	1	N	7	298.2
2012-09-14 MN1	SOD	delayed	1	N	8	332.6
2012-09-14 MN1	SOD	delayed	1	N	9	483.6
2012-09-14 MN1	SOD	delayed	1	N	9	432.9
2012-09-14 MN1	SOD	delayed	1	N	6	280
2012-09-14 MN1	SOD	delayed	2	N	5	548.4
2012-09-14 MN1	SOD	delayed	2	N	5	515.7
2012-09-14 MN1	SOD	delayed	2	N	5	570.1
2012-09-14 MN1	SOD	delayed	2	N	5	621.5
2012-09-14 MN1	SOD	delayed	2	N	3	577.4
2012-09-14 MN1	SOD	delayed	2	N	7	649.8
2012-09-14 MN1	SOD	delayed	2	N	7	628.6
2012-09-14 MN1	SOD	delayed	2	N	8	469.3
2012-09-14 MN1	SOD	delayed	2	N	8	617.2
2012-09-14 MN1	SOD	delayed	2	N	7	597.7
2012-09-14 MN1	SOD	delayed	2	N	6	473.2
2012-09-14 MN1	SOD	delayed	2	N	8	611
2012-09-14 MN1	SOD	delayed	2	N	8	591.7
2012-09-14 MN1	SOD	delayed	2	N	7	522.9
2012-09-14 MN1	SOD	delayed	2	N	6	461.8
2012-09-14 MN1	SOD	delayed	2	N	7	522.2
2012-09-14 MN1	SOD	delayed	2	N	7	515.9
2012-09-14 MN1	SOD	delayed	2	N	7	460.1
2012-09-14 MN1	SOD	delayed	2	N	7	445.9
2012-09-14 MN1	SOD	delayed	2	N	6	519.1
2012-09-14 MN1	SOD	delayed	2	N	3	493.2
2012-09-14 MN1	SOD	delayed	3	N	1	741.8
2012-09-14 MN1	SOD	delayed	4	N	5	141.1
2012-09-14 MN1	SOD	delayed	4	N	5	151.6
2012-09-14 MN1	SOD	delayed	4	N	4	246.7
2012-09-14 MN1	SOD	delayed	4	N	4	275.8
2012-09-14 MN1	SOD	delayed	4	N	4	224.8
2012-09-14 MN1	SOD	delayed	4	N	3	490.8
2012-09-14 MN1	SOD	delayed	4	N	4	362
2012-09-14 MN1	SOD	delayed	4	N	4	562.1
2012-09-14 MN1	SOD	delayed	5	N	4	420
2012-09-14 MN1	SOD	delayed	5	N	5	301.6
2012-09-14 MN1	SOD	delayed	5	N	6	210.9
2012-09-14 MN1	SOD	delayed	5	N	8	410.1
2012-09-14 MN1	SOD	delayed	5	N	8	412.6
2012-09-14 MN1	SOD	delayed	5	N	7	601.7
2012-09-14 MN1	SOD	delayed	5	N	4	363.8
2012-09-14 MN1	SOD	delayed	5	N	4	384.4
2012-09-14 MN1	SOD	delayed	5	N	2	107.1
2012-09-14 MN1	SOD	delayed	6	N	6	420.4
2012-09-14 MN1	SOD	delayed	6	N	6	373.3
2012-09-14 MN1	SOD	delayed	6	N	5	298.7
2012-09-14 MN1	SOD	delayed	6	N	4	282.7
2012-09-14 MN1	SOD	delayed	6	N	4	386.1
2012-09-14 MN1	SOD	delayed	6	N	4	384.4
2012-09-14 MN1	SOD	delayed	6	N	4	238.8
2012-09-14 MN1	SOD	delayed	6	N	5	256.5
2012-09-14 MN1	SOD	delayed	6	N	5	237
2012-09-14 MN1	SOD	delayed	6	N	5	515.2
2012-09-14 MN1	SOD	delayed	6	N	5	500.4
2012-09-14 MN1	SOD	delayed	6	N	5	572.7
2012-09-14 MN1	SOD	delayed	6	N	6	573.4
2012-09-14 MN1	SOD	delayed	6	N	6	490.6
2012-09-14 MN1	SOD	delayed	7	N	4	181.1
2012-09-14 MN1	SOD	delayed	7	N	4	599.5
2012-09-14 MN1	SOD	delayed	7	N	3	101.9
2012-09-14 MN1	SOD	delayed	7	N	4	121.5
2012-09-14 MN1	SOD	delayed	7	N	5	189.5
2012-09-14 MN1	SOD	delayed	7	N	6	151.2
2012-09-14 MN1	SOD	delayed	7	N	6	154.1
2012-09-14 MN1	SOD	delayed	7	N	4	356.3
2012-09-14 MN1	SOD	delayed	7	N	5	181.2
2012-09-14 MN1	SOD	delayed	7	N	6	229
2012-09-14 MN1	SOD	delayed	7	N	6	362.2
2012-09-14 MN2	SOD	delayed	1	N	3	422.9
2012-09-14 MN2	SOD	delayed	1	N	3	365.7
2012-09-14 MN2	SOD	delayed	1	N	5	437.7
2012-09-14 MN2	SOD	delayed	1	N	5	512.5
2012-09-14 MN2	SOD	delayed	1	N	4	221.1
2012-09-14 MN2	SOD	delayed	1	N	4	410.3
2012-09-14 MN2	SOD	delayed	1	N	4	383.4
2012-09-14 MN2	SOD	delayed	2	N	5	400.3
2012-09-14 MN2	SOD	delayed	2	N	5	302.3
2012-09-14 MN2	SOD	delayed	2	N	5	408.1
2012-09-14 MN2	SOD	delayed	2	N	5	369.2
2012-09-14 MN2	SOD	delayed	2	N	3	104.7
2012-09-14 MN2	SOD	delayed	2	N	3	283
2012-09-14 MN2	SOD	delayed	2	N	4	519.4
2012-09-14 MN2	SOD	delayed	2	N	4	430.1
2012-09-14 MN2	SOD	delayed	3	N	4	391.2
2012-09-14 MN2	SOD	delayed	3	N	4	381.5
2012-09-14 MN2	SOD	delayed	3	N	3	373.5
2012-09-14 MN2	SOD	delayed	3	N	3	376.8
2012-09-14 MN2	SOD	delayed	3	N	3	255.1
2012-09-14 MN2	SOD	delayed	4	N	2	33.3
2012-09-14 MN2	SOD	delayed	4	N	2	14.6
2012-09-14 MN2	SOD	delayed	5	N	5	225.7
2012-09-14 MN2	SOD	delayed	5	N	6	338.3
2012-09-14 MN2	SOD	delayed	5	N	6	336.8
2012-09-14 MN2	SOD	delayed	5	N	5	331.5
2012-09-14 MN2	SOD	delayed	5	N	5	343.7
2012-09-14 MN2	SOD	delayed	5	N	4	96.6
2012-09-14 MN2	SOD	delayed	5	N	4	190.6
2012-09-14 MN2	SOD	delayed	5	N	7	344.7
2012-09-14 MN2	SOD	delayed	5	N	7	357
2012-09-14 MN2	SOD	delayed	5	N	6	307
2012-09-14 MN2	SOD	delayed	5	N	6	286
2012-09-14 MN2	SOD	delayed	5	N	6	287.6
2012-09-14 MN2	SOD	delayed	5	N	4	224.5
2012-09-14 MN2	SOD	delayed	5	N	4	256
2012-09-14 MN2	SOD	delayed	5	N	4	179.2
2012-09-14 MN2	SOD	delayed	6	N	4	422
2012-09-14 MN2	SOD	delayed	6	N	4	454.3
2012-09-14 MN2	SOD	delayed	6	N	5	204.7
2012-09-14 MN2	SOD	delayed	6	N	5	365.8
2012-09-14 MN2	SOD	delayed	6	N	6	497
2012-09-14 MN2	SOD	delayed	6	N	6	266
2012-09-14 MN2	SOD	delayed	6	N	6	351.3
2012-09-14 MN2	SOD	delayed	6	N	7	311.1
2012-09-14 MN2	SOD	delayed	6	N	7	343
2012-09-14 MN2	SOD	delayed	6	N	4	213.4
2012-09-14 MN2	SOD	delayed	6	N	5	331.7
2012-09-14 MN2	SOD	delayed	6	N	5	337.3
2012-09-14 MN2	SOD	delayed	6	N	4	97
2012-09-14 MN2	SOD	delayed	6	N	4	364.3
2012-09-14 MN2	SOD	delayed	7	N	4	176.3
2012-09-14 MN2	SOD	delayed	7	N	4	207.4
2012-09-14 MN2	SOD	delayed	7	N	5	329.1
2012-09-14 MN2	SOD	delayed	7	N	5	270
2012-09-14 MN2	SOD	delayed	7	N	5	283.3
2012-09-14 MN2	SOD	delayed	7	N	5	293.6
2012-09-14 MN2	SOD	delayed	7	N	3	210
2012-09-14 MN2	SOD	delayed	7	N	3	245
2012-09-14 MN3	SOD	delayed?	1	N	6	408.3
2012-09-14 MN3	SOD	delayed?	1	N	6	350.9
2012-09-14 MN3	SOD	delayed?	1	N	8	414.4
2012-09-14 MN3	SOD	delayed?	1	N	9	458.7
2012-09-14 MN3	SOD	delayed?	1	N	9	506.2
2012-09-14 MN3	SOD	delayed?	1	N	9	463.3
2012-09-14 MN3	SOD	delayed?	1	N	9	471.2
2012-09-14 MN3	SOD	delayed?	1	N	10	476.7
2012-09-14 MN3	SOD	delayed?	1	N	10	542.9
2012-09-14 MN3	SOD	delayed?	1	N	11	460.9
2012-09-14 MN3	SOD	delayed?	1	N	11	563.2
2012-09-14 MN3	SOD	delayed?	1	N	11	489.7
2012-09-14 MN3	SOD	delayed?	1	N	12	485.7
2012-09-14 MN3	SOD	delayed?	1	N	12	485.1
2012-09-14 MN3	SOD	delayed?	1	N	6	413.4
2012-09-14 MN3	SOD	delayed?	1	N	7	441.7
2012-09-14 MN3	SOD	delayed?	1	N	7	536.3
2012-09-14 MN3	SOD	delayed?	1	N	6	445.4
2012-09-14 MN3	SOD	delayed?	1	N	7	452.7
2012-09-14 MN3	SOD	delayed?	1	N	7	342.3
2012-09-14 MN3	SOD	delayed?	1	N	6	268.3
2012-09-14 MN3	SOD	delayed?	1	N	3	324.8
2012-09-14 MN3	SOD	delayed?	1	N	3	75.9
2012-09-14 MN3	SOD	delayed?	1	N	6	330.9
2012-09-14 MN3	SOD	delayed?	1	N	6	473.7
2012-09-14 MN3	SOD	delayed?	1	N	5	178.7
2012-09-14 MN3	SOD	delayed?	1	N	5	350.7
2012-09-14 MN3	SOD	delayed?	1	N	6	508.7
2012-09-14 MN3	SOD	delayed?	1	N	6	528.9
2012-09-14 MN3	SOD	delayed?	2	N	4	368.9
2012-09-14 MN3	SOD	delayed?	2	N	7	436.1
2012-09-14 MN3	SOD	delayed?	2	N	7	504.5
2012-09-14 MN3	SOD	delayed?	2	N	6	389.9
2012-09-14 MN3	SOD	delayed?	2	N	8	514.9
2012-09-14 MN3	SOD	delayed?	2	N	8	461.1
2012-09-14 MN3	SOD	delayed?	2	N	7	402.8
2012-09-14 MN3	SOD	delayed?	2	N	7	489.1
2012-09-14 MN3	SOD	delayed?	2	N	8	499.1
2012-09-14 MN3	SOD	delayed?	2	N	8	493.8
2012-09-14 MN3	SOD	delayed?	2	N	2	264.6
2012-09-14 MN3	SOD	delayed?	3	N	4	478.5
2012-09-14 MN3	SOD	delayed?	3	N	4	593.1
2012-09-14 MN3	SOD	delayed?	3	N	4	429.3
2012-09-14 MN3	SOD	delayed?	3	N	4	374.7
2012-09-14 MN3	SOD	delayed?	3	N	3	97.7
2012-09-14 MN3	SOD	delayed?	3	N	6	433.2
2012-09-14 MN3	SOD	delayed?	3	N	6	314.2
2012-09-14 MN3	SOD	delayed?	3	N	6	302.6
2012-09-14 MN3	SOD	delayed?	3	N	6	322.6
2012-09-14 MN3	SOD	delayed?	3	N	4	283.8
2012-09-14 MN3	SOD	delayed?	4	N	7	348.7
2012-09-14 MN3	SOD	delayed?	4	N	8	573.2
2012-09-14 MN3	SOD	delayed?	4	N	9	696.4
2012-09-14 MN3	SOD	delayed?	4	N	9	523
2012-09-14 MN3	SOD	delayed?	4	N	8	540.2
2012-09-14 MN3	SOD	delayed?	4	N	9	309.8
2012-09-14 MN3	SOD	delayed?	4	N	9	319.6
2012-09-14 MN3	SOD	delayed?	4	N	7	493.7
2012-09-14 MN3	SOD	delayed?	4	N	6	317.6
2012-09-14 MN3	SOD	delayed?	4	N	7	325
2012-09-14 MN3	SOD	delayed?	4	N	7	254.7
2012-09-14 MN3	SOD	delayed?	4	N	4	554.4
2012-09-14 MN3	SOD	delayed?	4	N	6	1073.9
2012-09-14 MN3	SOD	delayed?	4	N	6	806.3
2012-09-14 MN3	SOD	delayed?	4	N	5	569.5
2012-09-14 MN3	SOD	delayed?	4	N	4	462.1
2012-09-14 MN3	SOD	delayed?	4	N	2	498
2012-09-14 MN3	SOD	delayed?	5	N	6	418.6
2012-09-14 MN3	SOD	delayed?	5	N	6	400.6
2012-09-14 MN3	SOD	delayed?	5	N	6	509.7
2012-09-14 MN3	SOD	delayed?	5	N	8	398.7
2012-09-14 MN3	SOD	delayed?	5	N	8	406.1
2012-09-14 MN3	SOD	delayed?	5	N	8	405
2012-09-14 MN3	SOD	delayed?	5	N	9	425.7
2012-09-14 MN3	SOD	delayed?	5	N	9	435.4
2012-09-14 MN3	SOD	delayed?	5	N	8	536.7
2012-09-14 MN3	SOD	delayed?	5	N	8	501.7
2012-09-14 MN3	SOD	delayed?	5	N	7	357.3
2012-09-14 MN3	SOD	delayed?	5	N	7	372.9
2012-09-14 MN3	SOD	delayed?	5	N	8	335.2
2012-09-14 MN3	SOD	delayed?	5	N	9	368.2
2012-09-14 MN3	SOD	delayed?	5	N	10	386.3
2012-09-14 MN3	SOD	delayed?	5	N	10	398
2012-09-14 MN3	SOD	delayed?	5	N	7	395.3
2012-09-14 MN3	SOD	delayed?	5	N	7	370.9
2012-09-14 MN3	SOD	delayed?	5	N	6	260.5
2012-09-14 MN3	SOD	delayed?	5	N	13	491.2
2012-09-14 MN3	SOD	delayed?	5	N	13	493.1
2012-09-14 MN3	SOD	delayed?	5	N	13	500.1
2012-09-14 MN3	SOD	delayed?	5	N	14	511.7
2012-09-14 MN3	SOD	delayed?	5	N	14	511.6
2012-09-14 MN3	SOD	delayed?	5	N	12	583.6
2012-09-14 MN3	SOD	delayed?	5	N	15	830.4
2012-09-14 MN3	SOD	delayed?	5	N	15	741.4
2012-09-14 MN3	SOD	delayed?	5	N	15	636.6
2012-09-14 MN3	SOD	delayed?	5	N	15	635.5
2012-09-14 MN3	SOD	delayed?	5	N	14	589.3
2012-09-14 MN3	SOD	delayed?	5	N	14	587.6
2012-09-14 MN3	SOD	delayed?	5	N	10	448.6
2012-09-14 MN3	SOD	delayed?	5	N	9	464.5
2012-09-14 MN3	SOD	delayed?	5	N	8	431.1
2012-09-14 MN3	SOD	delayed?	5	N	7	419
2012-09-14 MN3	SOD	delayed?	5	N	9	665.2
2012-09-14 MN3	SOD	delayed?	5	N	9	581.2
2012-09-14 MN3	SOD	delayed?	5	N	8	591.6
2012-09-14 MN3	SOD	delayed?	5	N	7	628.9
2012-09-14 MN3	SOD	delayed?	5	N	5	325.3
2012-09-14 MN3	SOD	delayed?	5	N	4	80
2012-09-14 MN3	SOD	delayed?	5	N	2	96.8
2012-09-14 MN3	SOD	delayed?	6	N	4	380.8
2012-09-14 MN3	SOD	delayed?	6	N	6	390.3
2012-09-14 MN3	SOD	delayed?	6	N	7	477.7
2012-09-14 MN3	SOD	delayed?	6	N	7	540.4
2012-09-14 MN3	SOD	delayed?	6	N	3	133.1
2012-09-14 MN3	SOD	delayed?	6	N	2	376.4
2012-09-21 MN2	WT	immediate	1	N	5	270.5
2012-09-21 MN2	WT	immediate	1	N	5	237.7
2012-09-21 MN2	WT	immediate	1	N	4	185.3
2012-09-21 MN2	WT	immediate	1	N	4	320.4
2012-09-21 MN2	WT	immediate	1	N	4	181.9
2012-09-21 MN2	WT	immediate	1	N	3	112.1
2012-09-21 MN2	WT	immediate	1	N	3	99.8
2012-09-21 MN2	WT	immediate	2	N	2	83.1
2012-09-21 MN2	WT	immediate	2	N	3	119.5
2012-09-21 MN2	WT	immediate	2	N	4	162.6
2012-09-21 MN2	WT	immediate	2	N	4	143.4
2012-09-21 MN2	WT	immediate	3	N	1	232.6
2012-09-21 MN2	WT	immediate	4	N	2	99.5
2012-09-21 MN2	WT	immediate	4	N	6	182.7
2012-09-21 MN2	WT	immediate	4	N	6	223.1
2012-09-21 MN2	WT	immediate	4	N	5	125.4
2012-09-21 MN2	WT	immediate	4	N	4	147.8
2012-09-21 MN2	WT	immediate	4	N	4	183.9
2012-09-21 MN2	WT	immediate	4	N	4	175.5
2012-09-21 MN2	WT	immediate	5	N	2	75.4
2012-09-21 MN2	WT	immediate	5	N	4	191
2012-09-21 MN2	WT	immediate	5	N	4	125.5
2012-09-21 MN2	WT	immediate	5	N	3	63.5
2012-09-21 MN2	WT	immediate	5	N	3	221.2
2012-09-21 MN2	WT	immediate	5	N	4	157
2012-09-21 MN2	WT	immediate	5	N	4	150.6
2012-09-21 MN2	WT	immediate	6	N	1	122.1
2012-09-21 MN2	WT	immediate	7	N	3	192.2
2012-09-21 MN2	WT	immediate	7	N	3	225.7
2012-09-21 MN2	WT	immediate	7	N	2	150
2012-09-21 MN2	WT	immediate	8	N	5	148.1
2012-09-21 MN2	WT	immediate	8	N	5	162.6
2012-09-21 MN2	WT	immediate	8	N	6	292.8
2012-09-21 MN2	WT	immediate	8	N	6	217.3
2012-09-21 MN2	WT	immediate	8	N	6	164.7
2012-09-21 MN2	WT	immediate	8	N	6	155.5
2012-09-21 MN2	WT	immediate	8	N	3	166.6
2012-09-21 MN2	WT	immediate	8	N	3	285.4
2012-09-21 MN2	WT	immediate	8	N	4	122.9
2012-09-21 MN2	WT	immediate	8	N	4	227.5
2012-09-21 MN2	WT	immediate	9	N	3	38
2012-09-21 MN2	WT	immediate	9	N	3	35.9
2012-09-21 MN2	WT	immediate	9	N	3	99.9
2012-09-21 MN2	WT	immediate	9	N	6	284.3
2012-09-21 MN2	WT	immediate	9	N	7	315.2
2012-09-21 MN2	WT	immediate	9	N	7	280.5
2012-09-21 MN2	WT	immediate	9	N	5	126
2012-09-21 MN2	WT	immediate	9	N	6	310.6
2012-09-21 MN2	WT	immediate	9	N	6	166.9
2012-09-21 MN2	WT	immediate	9	N	8	243.3
2012-09-21 MN2	WT	immediate	9	N	8	200.7
2012-09-21 MN2	WT	immediate	9	N	7	295.9
2012-09-21 MN2	WT	immediate	9	N	6	111.8
2012-10-10 MN1	WT	delayed	1	N	2	337.8
2012-10-10 MN1	WT	delayed	1	N	4	301.4
2012-10-10 MN1	WT	delayed	1	N	5	288.1
2012-10-10 MN1	WT	delayed	1	N	5	320
2012-10-10 MN1	WT	delayed	1	N	4	356.3
2012-10-10 MN1	WT	delayed	1	N	4	281.9
2012-10-10 MN1	WT	delayed	2	N	5	404.7
2012-10-10 MN1	WT	delayed	2	N	5	228.9
2012-10-10 MN1	WT	delayed	2	N	5	152.4
2012-10-10 MN1	WT	delayed	2	N	6	234.1
2012-10-10 MN1	WT	delayed	2	N	6	232.4
2012-10-10 MN1	WT	delayed	2	N	4	157.4
2012-10-10 MN1	WT	delayed	2	N	5	209.1
2012-10-10 MN1	WT	delayed	2	N	5	220.9
2012-10-10 MN1	WT	delayed	2	N	2	148.8
2012-10-10 MN1	WT	delayed	3	N	1	95
2012-10-10 MN1	WT	delayed	4	N	3	94.4
2012-10-10 MN1	WT	delayed	4	N	3	119.3
2012-10-10 MN1	WT	delayed	4	N	3	130
2012-10-10 MN1	WT	delayed	4	N	3	127.2
2012-10-10 MN1	WT	delayed	5	N	3	175.5
2012-10-10 MN1	WT	delayed	5	N	3	344.5
2012-10-10 MN1	WT	delayed	5	N	3	429.3
2012-10-10 MN1	WT	delayed	5	N	3	225
2012-10-10 MN1	WT	delayed	6	N	8	514.9
2012-10-10 MN1	WT	delayed	6	N	8	415.4
2012-10-10 MN1	WT	delayed	6	N	8	273.8
2012-10-10 MN1	WT	delayed	6	N	8	512.4
2012-10-10 MN1	WT	delayed	6	N	6	203.5
2012-10-10 MN1	WT	delayed	6	N	9	280.3
2012-10-10 MN1	WT	delayed	6	N	10	301.5
2012-10-10 MN1	WT	delayed	6	N	11	424.3
2012-10-10 MN1	WT	delayed	6	N	11	440.7
2012-10-10 MN1	WT	delayed	6	N	8	567.6
2012-10-10 MN1	WT	delayed	6	N	9	277.8
2012-10-10 MN1	WT	delayed	6	N	9	437.4
2012-10-10 MN1	WT	delayed	6	N	7	192.8
2012-10-10 MN1	WT	delayed	6	N	8	460.1
2012-10-10 MN1	WT	delayed	6	N	8	471.1
2012-10-10 MN1	WT	delayed	6	N	5	189.5
2012-10-10 MN1	WT	delayed	6	N	5	186.2
2012-10-10 MN1	WT	delayed	6	N	5	395.9
2012-10-10 MN1	WT	delayed	6	N	5	324.3
2012-10-10 MN1	WT	delayed	6	N	5	229.6
2012-10-10 MN1	WT	delayed	6	N	5	390.8
2012-10-10 MN1	WT	delayed	6	N	2	117
2012-10-10 MN2	WT	delayed	1	N	3	354.5
2012-10-10 MN2	WT	delayed	1	N	3	302.8
2012-10-10 MN2	WT	delayed	1	N	2	181.7
2012-10-10 MN2	WT	delayed	2	N	2	314.1
2012-10-10 MN2	WT	delayed	2	N	2	441.2
2012-10-10 MN2	WT	delayed	3	N	3	329.7
2012-10-10 MN2	WT	delayed	3	N	4	322
2012-10-10 MN2	WT	delayed	3	N	4	187
2012-10-10 MN2	WT	delayed	3	N	2	348.8
2012-10-10 MN2	WT	delayed	4	N	4	399.1
2012-10-10 MN2	WT	delayed	4	N	5	79.7
2012-10-10 MN2	WT	delayed	4	N	5	85
2012-10-10 MN2	WT	delayed	4	N	4	484.2
2012-10-10 MN2	WT	delayed	4	N	4	355.3
2012-10-10 MN2	WT	delayed	4	N	2	19.3
2012-10-10 MN2	WT	delayed	5	N	2	224.8
2012-10-10 MN2	WT	delayed	5	N	3	320.8
2012-10-10 MN2	WT	delayed	5	N	3	235.9
2012-10-10 MN2	WT	delayed	6	N	3	74.9
2012-10-10 MN2	WT	delayed	6	N	3	66.4
2012-10-10 MN2	WT	delayed	6	N	2	38.8
2012-10-10 MN2	WT	delayed	7	N	8	328
2012-10-10 MN2	WT	delayed	7	N	8	391.1
2012-10-10 MN2	WT	delayed	7	N	7	399.4
2012-10-10 MN2	WT	delayed	7	N	7	408.5
2012-10-10 MN2	WT	delayed	7	N	7	421
2012-10-10 MN2	WT	delayed	7	N	4	315.7
2012-10-10 MN2	WT	delayed	7	N	5	240.4
2012-10-10 MN2	WT	delayed	7	N	6	213.9
2012-10-10 MN2	WT	delayed	7	N	6	226.9
2012-10-10 MN2	WT	delayed	7	N	4	209.3
2012-10-10 MN2	WT	delayed	7	N	3	34.8
2012-10-10 MN2	WT	delayed	8	N	3	471.7
2012-10-10 MN2	WT	delayed	8	N	3	216.7
2012-10-10 MN2	WT	delayed	8	N	4	323.7
2012-10-10 MN2	WT	delayed	8	N	4	230.4
2012-10-10 MN2	WT	delayed	8	N	4	219.7
2012-10-10 MN2	WT	delayed	8	N	4	165.2
2012-10-2 MN1	WT	delayed	1	N	3	209.8
2012-10-2 MN1	WT	delayed	1	N	3	239.4
2012-10-2 MN1	WT	delayed	1	N	7	439.3
2012-10-2 MN1	WT	delayed	1	N	7	477.5
2012-10-2 MN1	WT	delayed	1	N	6	341.6
2012-10-2 MN1	WT	delayed	1	N	6	404.5
2012-10-2 MN1	WT	delayed	1	N	7	427.3
2012-10-2 MN1	WT	delayed	1	N	7	359.9
2012-10-2 MN1	WT	delayed	1	N	5	287.9
2012-10-2 MN1	WT	delayed	1	N	4	156.1
2012-10-2 MN1	WT	delayed	1	N	4	129.4
2012-10-2 MN1	WT	delayed	2	N	3	614.4
2012-10-2 MN1	WT	delayed	2	N	5	626.2
2012-10-2 MN1	WT	delayed	2	N	5	563.3
2012-10-2 MN1	WT	delayed	2	N	5	523.4
2012-10-2 MN1	WT	delayed	2	N	5	557.1
2012-10-2 MN1	WT	delayed	2	N	4	509
2012-10-2 MN1	WT	delayed	2	N	8	473.2
2012-10-2 MN1	WT	delayed	2	N	8	460.4
2012-10-2 MN1	WT	delayed	2	N	7	503.5
2012-10-2 MN1	WT	delayed	2	N	8	522.6
2012-10-2 MN1	WT	delayed	2	N	8	535.1
2012-10-2 MN1	WT	delayed	2	N	7	378.1
2012-10-2 MN1	WT	delayed	2	N	8	544.3
2012-10-2 MN1	WT	delayed	2	N	9	648.6
2012-10-2 MN1	WT	delayed	2	N	9	636.1
2012-10-2 MN1	WT	delayed	2	N	7	485.3
2012-10-2 MN1	WT	delayed	2	N	8	608.8
2012-10-2 MN1	WT	delayed	2	N	9	661.9
2012-10-2 MN1	WT	delayed	2	N	9	476.5
2012-10-2 MN1	WT	delayed	2	N	8	665.9
2012-10-2 MN1	WT	delayed	2	N	8	651.4
2012-10-2 MN1	WT	delayed	3	N	2	292.7
2012-10-2 MN1	WT	delayed	3	N	2	228.4
2012-10-2 MN1	WT	delayed	4	N	3	140.2
2012-10-2 MN1	WT	delayed	4	N	3	137.1
2012-10-2 MN1	WT	delayed	4	N	5	289.1
2012-10-2 MN1	WT	delayed	4	N	5	289.7
2012-10-2 MN1	WT	delayed	4	N	3	430.9
2012-10-2 MN1	WT	delayed	5	N	5	319.3
2012-10-2 MN1	WT	delayed	5	N	5	289.7
2012-10-2 MN1	WT	delayed	5	N	4	254.8
2012-10-2 MN1	WT	delayed	5	N	3	397.3
2012-10-2 MN1	WT	delayed	5	N	3	189.6
2012-10-2 MN1	WT	delayed	5	N	3	209.2
2012-10-2 MN1	WT	delayed	6	N	4	168
2012-10-2 MN1	WT	delayed	6	N	4	361.2
2012-10-2 MN1	WT	delayed	6	N	3	108.4
2012-10-2 MN1	WT	delayed	6	N	4	193.8
2012-10-2 MN1	WT	delayed	6	N	4	146.2
2012-10-2 MN1	WT	delayed	6	N	4	184.9
2012-10-2 MN1	WT	delayed	6	N	4	135
2012-11-09 MN2	WT	delayed	1	N	6	312.2
2012-11-09 MN2	WT	delayed	1	N	6	475
2012-11-09 MN2	WT	delayed	1	N	5	372.6
2012-11-09 MN2	WT	delayed	1	N	4	310
2012-11-09 MN2	WT	delayed	1	N	9	490.4
2012-11-09 MN2	WT	delayed	1	N	9	456.2
2012-11-09 MN2	WT	delayed	1	N	8	460.7
2012-11-09 MN2	WT	delayed	1	N	7	368.8
2012-11-09 MN2	WT	delayed	1	N	7	310.7
2012-11-09 MN2	WT	delayed	1	N	7	486.4
2012-11-09 MN2	WT	delayed	1	N	5	310.9
2012-11-09 MN2	WT	delayed	1	N	5	403.4
2012-11-09 MN2	WT	delayed	1	N	5	436.5
2012-11-09 MN2	WT	delayed	1	N	4	190.6
2012-11-09 MN2	WT	delayed	1	N	3	179.1
2012-11-09 MN2	WT	delayed	2	N	3	469.6
2012-11-09 MN2	WT	delayed	2	N	3	399.4
2012-11-09 MN2	WT	delayed	2	N	3	178.9
2012-11-09 MN2	WT	delayed	2	N	3	342
2012-11-09 MN2	WT	delayed	3	N	4	453.8
2012-11-09 MN2	WT	delayed	3	N	6	328.1
2012-11-09 MN2	WT	delayed	3	N	6	352.2
2012-11-09 MN2	WT	delayed	3	N	5	352.9
2012-11-09 MN2	WT	delayed	3	N	4	357.5
2012-11-09 MN2	WT	delayed	3	N	4	325.6
2012-11-09 MN2	WT	delayed	3	N	2	446.5
2012-11-09 MN2	WT	delayed	4	N	4	346.1
2012-11-09 MN2	WT	delayed	4	N	5	334
2012-11-09 MN2	WT	delayed	4	N	5	337.5
2012-11-09 MN2	WT	delayed	4	N	3	402.7
2012-11-09 MN2	WT	delayed	4	N	4	378.7
2012-11-09 MN2	WT	delayed	4	N	4	383.7
2012-11-09 MN2	WT	delayed	4	N	5	284.2
2012-11-09 MN2	WT	delayed	4	N	6	405
2012-11-09 MN2	WT	delayed	4	N	6	466
2012-11-09 MN2	WT	delayed	4	N	4	332.3
2012-11-09 MN2	WT	delayed	5	N	3	263.6
2012-11-09 MN2	WT	delayed	5	N	3	268.3
2012-11-09 MN2	WT	delayed	5	N	3	339.4
2012-11-09 MN2	WT	delayed	5	N	3	402.7
2012-11-09 MN2	WT	delayed	6	N	1	30.2
2012-11-09 MN2	WT	delayed	7	N	3	331
2012-11-09 MN2	WT	delayed	7	N	3	343.1
2012-11-09 MN2	WT	delayed	7	N	7	563.1
2012-11-09 MN2	WT	delayed	7	N	8	653.7
2012-11-09 MN2	WT	delayed	7	N	8	686.3
2012-11-09 MN2	WT	delayed	7	N	6	417.5
2012-11-09 MN2	WT	delayed	7	N	5	388.1
2012-11-09 MN2	WT	delayed	7	N	4	309.4
2012-11-09 MN2	WT	delayed	7	N	3	261.8
2012-11-09 MN2	WT	delayed	8	N	1	66
2012-11-14 MN1	WT	delayed	1	N	6	315.5
2012-11-14 MN1	WT	delayed	1	N	8	438.2
2012-11-14 MN1	WT	delayed	1	N	10	540.6
2012-11-14 MN1	WT	delayed	1	N	10	554.9
2012-11-14 MN1	WT	delayed	1	N	9	540.4
2012-11-14 MN1	WT	delayed	1	N	8	373.9
2012-11-14 MN1	WT	delayed	1	N	8	395.1
2012-11-14 MN1	WT	delayed	1	N	8	369.5
2012-11-14 MN1	WT	delayed	1	N	9	466.9
2012-11-14 MN1	WT	delayed	1	N	9	507.8
2012-11-14 MN1	WT	delayed	1	N	8	365.5
2012-11-14 MN1	WT	delayed	1	N	7	363.5
2012-11-14 MN1	WT	delayed	1	N	7	309.2
2012-11-14 MN1	WT	delayed	1	N	7	226.9
2012-11-14 MN1	WT	delayed	1	N	6	181.8
2012-11-14 MN1	WT	delayed	1	N	6	346
2012-11-14 MN1	WT	delayed	1	N	7	213.5
2012-11-14 MN1	WT	delayed	1	N	7	338.3
2012-11-14 MN1	WT	delayed	1	N	6	144.5
2012-11-14 MN1	WT	delayed	1	N	4	217.2
2012-11-14 MN1	WT	delayed	1	N	7	424.6
2012-11-14 MN1	WT	delayed	1	N	7	450.6
2012-11-14 MN1	WT	delayed	1	N	6	420.9
2012-11-14 MN1	WT	delayed	1	N	5	298.8
2012-11-14 MN1	WT	delayed	1	N	3	88.7
2012-11-14 MN1	WT	delayed	1	N	7	450.5
2012-11-14 MN1	WT	delayed	1	N	7	297.4
2012-11-14 MN1	WT	delayed	1	N	6	399.2
2012-11-14 MN1	WT	delayed	1	N	5	325.9
2012-11-14 MN1	WT	delayed	1	N	7	468
2012-11-14 MN1	WT	delayed	1	N	7	380
2012-11-14 MN1	WT	delayed	1	N	6	344
2012-11-14 MN1	WT	delayed	1	N	9	512.4
2012-11-14 MN1	WT	delayed	1	N	9	458.4
2012-11-14 MN1	WT	delayed	1	N	10	568
2012-11-14 MN1	WT	delayed	1	N	10	433.9
2012-11-14 MN1	WT	delayed	1	N	9	400
2012-11-14 MN1	WT	delayed	1	N	7	391.8
2012-11-14 MN1	WT	delayed	1	N	6	345.6
2012-11-14 MN1	WT	delayed	2	N	1	48.3
2012-11-14 MN1	WT	delayed	3	N	2	526.6
2012-11-14 MN1	WT	delayed	3	N	2	476.5
2012-11-14 MN1	WT	delayed	4	N	3	218.1
2012-11-14 MN1	WT	delayed	4	N	3	379.8
2012-11-14 MN1	WT	delayed	4	N	4	253.7
2012-11-14 MN1	WT	delayed	4	N	4	424
2012-11-14 MN1	WT	delayed	4	N	6	395.5
2012-11-14 MN1	WT	delayed	4	N	6	388.9
2012-11-14 MN1	WT	delayed	4	N	6	285.1
2012-11-14 MN1	WT	delayed	4	N	7	509
2012-11-14 MN1	WT	delayed	4	N	7	491.1
2012-11-14 MN1	WT	delayed	4	N	4	326.3
2012-11-14 MN1	WT	delayed	5	N	5	193.5
2012-11-14 MN1	WT	delayed	5	N	8	194.3
2012-11-14 MN1	WT	delayed	5	N	8	234
2012-11-14 MN1	WT	delayed	5	N	7	175.8
2012-11-14 MN1	WT	delayed	5	N	6	249.9
2012-11-14 MN1	WT	delayed	5	N	5	125.7
2012-11-14 MN1	WT	delayed	5	N	6	203
2012-11-14 MN1	WT	delayed	5	N	7	350.9
2012-11-14 MN1	WT	delayed	5	N	7	321.3
2012-11-14 MN1	WT	delayed	5	N	5	397.1
2012-11-14 MN1	WT	delayed	5	N	5	506.7
2012-11-14 MN1	WT	delayed	5	N	5	166.9
2012-11-14 MN1	WT	delayed	5	N	5	167.5
2012-11-14 MN1	WT	delayed	5	N	5	197.6
2012-11-14 MN1	WT	delayed	5	N	7	345.3
2012-11-14 MN1	WT	delayed	5	N	7	349.3
2012-11-14 MN1	WT	delayed	5	N	6	349.4
2012-11-14 MN1	WT	delayed	5	N	4	170.1
2012-11-14 MN1	WT	delayed	5	N	3	137
2012-11-14 MN2	WT	immediate	1	N	2	29.6
2012-11-14 MN2	WT	immediate	1	N	3	19.4
2012-11-14 MN2	WT	immediate	1	N	6	232.7
2012-11-14 MN2	WT	immediate	1	N	6	350.8
2012-11-14 MN2	WT	immediate	1	N	5	112.3
2012-11-14 MN2	WT	immediate	1	N	5	253.6
2012-11-14 MN2	WT	immediate	1	N	5	416.1
2012-11-14 MN2	WT	immediate	2	N	2	150.4
2012-11-14 MN2	WT	immediate	2	N	5	329.1
2012-11-14 MN2	WT	immediate	2	N	5	337
2012-11-14 MN2	WT	immediate	2	N	3	341.5
2012-11-14 MN2	WT	immediate	3	N	2	71.5
2012-11-14 MN2	WT	immediate	3	N	3	277.4
2012-11-14 MN2	WT	immediate	3	N	4	363.8
2012-11-14 MN2	WT	immediate	3	N	4	418.8
2012-11-14 MN2	WT	immediate	4	N	4	354.1
2012-11-14 MN2	WT	immediate	4	N	5	123.9
2012-11-14 MN2	WT	immediate	4	N	5	126.9
2012-11-14 MN2	WT	immediate	4	N	4	258.2
2012-11-14 MN2	WT	immediate	4	N	4	248.2
2012-11-14 MN2	WT	immediate	4	N	2	45.4
2012-11-14 MN2	WT	immediate	5	N	2	221.3
2012-11-14 MN2	WT	immediate	5	N	2	56.3
2012-11-14 MN2	WT	immediate	6	N	3	151.5
2012-11-14 MN2	WT	immediate	6	N	4	115
2012-11-14 MN2	WT	immediate	6	N	4	200.7
2012-11-14 MN2	WT	immediate	6	N	2	69.3
2012-11-14 MN2	WT	immediate	7	N	3	157.2
2012-11-14 MN2	WT	immediate	7	N	4	227.9
2012-11-14 MN2	WT	immediate	7	N	4	267.3
2012-11-14 MN2	WT	immediate	8	N	2	200.6
2012-11-14 MN2	WT	immediate	8	N	5	242.1
2012-11-14 MN2	WT	immediate	8	N	5	246.9
2012-11-14 MN2	WT	immediate	8	N	4	213.6
2012-11-14 MN2	WT	immediate	8	N	3	208.1
2012-11-14 MN3	WT	delayed	1	N	2	262.3
2012-11-14 MN3	WT	delayed	1	N	3	398.7
2012-11-14 MN3	WT	delayed	1	N	6	240.8
2012-11-14 MN3	WT	delayed	1	N	7	306.5
2012-11-14 MN3	WT	delayed	1	N	7	403.1
2012-11-14 MN3	WT	delayed	1	N	6	388.1
2012-11-14 MN3	WT	delayed	1	N	6	269.3
2012-11-14 MN3	WT	delayed	1	N	7	370.1
2012-11-14 MN3	WT	delayed	1	N	8	276.9
2012-11-14 MN3	WT	delayed	1	N	8	287
2012-11-14 MN3	WT	delayed	1	N	6	224.5
2012-11-14 MN3	WT	delayed	1	N	6	404.7
2012-11-14 MN3	WT	delayed	1	N	6	374.1
2012-11-14 MN3	WT	delayed	2	N	4	277.2
2012-11-14 MN3	WT	delayed	2	N	5	292.6
2012-11-14 MN3	WT	delayed	2	N	5	230.1
2012-11-14 MN3	WT	delayed	2	N	4	202.6
2012-11-14 MN3	WT	delayed	2	N	4	318.3
2012-11-14 MN3	WT	delayed	2	N	6	363.1
2012-11-14 MN3	WT	delayed	2	N	6	236
2012-11-14 MN3	WT	delayed	2	N	6	327.3
2012-11-14 MN3	WT	delayed	2	N	6	315
2012-11-14 MN3	WT	delayed	2	N	2	190.9
2012-11-14 MN3	WT	delayed	3	N	2	241.1
2012-11-14 MN3	WT	delayed	3	N	3	256.3
2012-11-14 MN3	WT	delayed	3	N	3	280.1
2012-11-14 MN3	WT	delayed	4	N	4	124.4
2012-11-14 MN3	WT	delayed	4	N	5	347.9
2012-11-14 MN3	WT	delayed	4	N	5	323.9
2012-11-14 MN3	WT	delayed	4	N	4	363.7
2012-11-14 MN3	WT	delayed	4	N	5	273
2012-11-14 MN3	WT	delayed	4	N	5	124.6
2012-11-14 MN3	WT	delayed	4	N	2	259.2
2012-11-14 MN3	WT	delayed	5	N	1	4.6
2012-11-14 MN3	WT	delayed	6	N	5	278.8
2012-11-14 MN3	WT	delayed	6	N	5	297.6
2012-11-14 MN3	WT	delayed	6	N	6	243.4
2012-11-14 MN3	WT	delayed	6	N	6	181.1
2012-11-14 MN3	WT	delayed	6	N	5	185.1
2012-11-14 MN3	WT	delayed	6	N	4	237.6
2012-11-14 MN3	WT	delayed	6	N	5	224.9
2012-11-14 MN3	WT	delayed	6	N	5	105.7
2012-11-14 MN3	WT	delayed	6	N	3	242
2012-11-14 MN3	WT	delayed	6	N	6	154.3
2012-11-14 MN3	WT	delayed	6	N	6	154.5
2012-11-14 MN3	WT	delayed	6	N	5	186.6
2012-11-14 MN3	WT	delayed	6	N	5	141.3
2012-11-14 MN3	WT	delayed	6	N	5	162.1
2012-11-16 MN1	WT	delayed	1	N	3	127.4
2012-11-16 MN1	WT	delayed	1	N	3	174.3
2012-11-16 MN1	WT	delayed	1	N	5	273.6
2012-11-16 MN1	WT	delayed	1	N	5	300.5
2012-11-16 MN1	WT	delayed	1	N	4	210.3
2012-11-16 MN1	WT	delayed	1	N	9	290.8
2012-11-16 MN1	WT	delayed	1	N	9	276.7
2012-11-16 MN1	WT	delayed	1	N	8	239.8
2012-11-16 MN1	WT	delayed	1	N	7	233.7
2012-11-16 MN1	WT	delayed	1	N	6	215.5
2012-11-16 MN1	WT	delayed	1	N	5	216.1
2012-11-16 MN1	WT	delayed	1	N	4	241
2012-11-16 MN1	WT	delayed	2	N	3	107
2012-11-16 MN1	WT	delayed	2	N	5	259.7
2012-11-16 MN1	WT	delayed	2	N	5	107.7
2012-11-16 MN1	WT	delayed	2	N	5	147.7
2012-11-16 MN1	WT	delayed	2	N	6	206.4
2012-11-16 MN1	WT	delayed	2	N	7	267.4
2012-11-16 MN1	WT	delayed	2	N	7	269.4
2012-11-16 MN1	WT	delayed	2	N	3	277.3
2012-11-16 MN1	WT	delayed	2	N	3	164.9
2012-11-16 MN1	WT	delayed	3	N	3	201.5
2012-11-16 MN1	WT	delayed	3	N	3	182.5
2012-11-16 MN1	WT	delayed	3	N	2	100.7
2012-11-16 MN1	WT	delayed	4	N	1	29.1
2012-11-16 MN1	WT	delayed	5	N	3	284.3
2012-11-16 MN1	WT	delayed	5	N	7	250.3
2012-11-16 MN1	WT	delayed	5	N	7	197.1
2012-11-16 MN1	WT	delayed	5	N	6	226.7
2012-11-16 MN1	WT	delayed	5	N	6	210.4
2012-11-16 MN1	WT	delayed	5	N	5	201.7
2012-11-16 MN1	WT	delayed	5	N	5	271.4
2012-11-16 MN1	WT	delayed	5	N	4	121.4
2012-11-16 MN1	WT	delayed	5	N	5	265.2
2012-11-16 MN1	WT	delayed	5	N	5	222.4
2012-11-16 MN1	WT	delayed	5	N	4	181.7
2012-11-16 MN2	WT	delayed	1	N	1	72.4
2012-11-16 MN2	WT	delayed	2	N	1	14.7
2012-11-16 MN2	WT	delayed	3	N	1	122.6
2012-11-16 MN2	WT	delayed	4	N	1	119.1
2012-11-16 MN2	WT	delayed	5	N	5	83.6
2012-11-16 MN2	WT	delayed	5	N	5	75.6
2012-11-16 MN2	WT	delayed	5	N	6	202.6
2012-11-16 MN2	WT	delayed	5	N	6	169.1
2012-11-16 MN2	WT	delayed	5	N	5	52.6
2012-11-16 MN2	WT	delayed	5	N	5	114.6
2012-11-16 MN2	WT	delayed	5	N	4	49.9
2012-11-16 MN2	WT	delayed	5	N	3	197.5
2012-11-16 MN2	WT	delayed	5	N	3	202.9
2012-11-16 MN2	WT	delayed	6	N	4	72
2012-11-16 MN2	WT	delayed	6	N	4	93.7
2012-11-16 MN2	WT	delayed	6	N	3	79
2012-11-16 MN2	WT	delayed	6	N	5	289.8
2012-11-16 MN2	WT	delayed	6	N	5	174.4
2012-11-16 MN2	WT	delayed	6	N	5	188.4
2012-11-16 MN2	WT	delayed	6	N	7	95.3
2012-11-16 MN2	WT	delayed	6	N	8	101.2
2012-11-16 MN2	WT	delayed	6	N	8	105.8
2012-11-16 MN2	WT	delayed	6	N	6	93.7
2012-11-16 MN2	WT	delayed	7	N	4	77.4
2012-11-16 MN2	WT	delayed	7	N	4	92.1
2012-11-16 MN2	WT	delayed	7	N	4	63.8
2012-11-16 MN2	WT	delayed	7	N	4	54.5
2012-11-16 MN2	WT	delayed	7	N	2	108
2012-11-16 MN2	WT	delayed	8	N	3	95.4
2012-11-16 MN2	WT	delayed	8	N	4	199.2
2012-11-16 MN2	WT	delayed	8	N	4	206.8
2012-11-16 MN2	WT	delayed	8	N	2	91.8
2012-11-16 MN3	WT	immediate	1	N	2	173.6
2012-11-16 MN3	WT	immediate	1	N	2	170.1
2012-11-16 MN3	WT	immediate	2	N	4	109.6
2012-11-16 MN3	WT	immediate	2	N	4	115.1
2012-11-16 MN3	WT	immediate	2	N	3	90
2012-11-16 MN3	WT	immediate	2	N	2	84.3
2012-11-16 MN3	WT	immediate	3	N	4	332.4
2012-11-16 MN3	WT	immediate	3	N	4	329.2
2012-11-16 MN3	WT	immediate	3	N	4	375.5
2012-11-16 MN3	WT	immediate	3	N	2	42.4
2012-11-16 MN3	WT	immediate	4	N	2	180.6
2012-11-16 MN3	WT	immediate	4	N	3	251.1
2012-11-16 MN3	WT	immediate	4	N	3	385.6
2012-11-16 MN3	WT	immediate	5	N	3	304.8
2012-11-16 MN3	WT	immediate	5	N	3	325
2012-11-16 MN3	WT	immediate	5	N	3	52.4
2012-11-16 MN3	WT	immediate	5	N	4	156.6
2012-11-16 MN3	WT	immediate	5	N	4	198.5
2012-11-16 MN3	WT	immediate	6	N	4	295.8
2012-11-16 MN3	WT	immediate	6	N	5	304.6
2012-11-16 MN3	WT	immediate	6	N	6	325.7
2012-11-16 MN3	WT	immediate	6	N	6	354.1
2012-11-16 MN3	WT	immediate	6	N	5	189.2
2012-11-16 MN3	WT	immediate	6	N	4	192.5
2012-11-16 MN3	WT	immediate	6	N	5	385.2
2012-11-16 MN3	WT	immediate	6	N	5	394.7
2012-11-16 MN3	WT	immediate	6	N	5	327.2
2012-11-16 MN3	WT	immediate	6	N	5	339.2
2012-11-16 MN3	WT	immediate	6	N	5	103.4
2012-11-16 MN3	WT	immediate	6	N	7	302.4
2012-11-16 MN3	WT	immediate	6	N	7	288.3
2012-11-16 MN3	WT	immediate	6	N	7	264.4
2012-11-16 MN3	WT	immediate	6	N	7	256.2
2012-11-16 MN3	WT	immediate	6	N	5	309.8
2012-11-16 MN3	WT	immediate	6	N	5	281.7
2012-11-16 MN3	WT	immediate	7	N	6	309.7
2012-11-16 MN3	WT	immediate	7	N	6	234.5
2012-11-16 MN3	WT	immediate	7	N	5	216.6
2012-11-16 MN3	WT	immediate	7	N	7	91.3
2012-11-16 MN3	WT	immediate	7	G	8	224.2
2012-11-16 MN3	WT	immediate	7	N	6	117.7
2012-11-16 MN3	WT	immediate	7	N	6	142.9
2012-11-16 MN3	WT	immediate	7	N	5	352.4
2012-11-16 MN3	WT	immediate	7	N	5	271.6
2012-11-16 MN3	WT	immediate	7	N	4	208.9
2012-11-16 MN3	WT	immediate	7	N	5	248.8
2012-11-16 MN3	WT	immediate	7	N	6	311.5
2012-11-16 MN3	WT	immediate	7	N	6	306.5
2012-11-16 MN3	WT	immediate	7	N	4	262.7
2012-11-16 MN3	WT	immediate	7	N	5	310.4
2012-11-16 MN3	WT	immediate	7	N	6	245.2
2012-11-16 MN3	WT	immediate	7	N	6	264.7
2012-11-16 MN3	WT	immediate	7	N	4	167.2
2012-11-16 MN3	WT	immediate	7	N	2	59.7
2012-11-16 MN3	WT	immediate	8	N	1	54.2
2012-11-16 MN3	WT	immediate	9	N	3	157
2012-11-16 MN3	WT	immediate	9	N	3	333.9
2012-11-16 MN3	WT	immediate	9	N	2	222
2012-12-12 MN2	WT	immediate	1	N	3	803.2
2012-12-12 MN2	WT	immediate	1	N	3	685.7
2012-12-12 MN2	WT	immediate	1	N	3	88.1
2012-12-12 MN2	WT	immediate	1	N	5	610.7
2012-12-12 MN2	WT	immediate	1	N	6	703.7
2012-12-12 MN2	WT	immediate	1	N	6	648.9
2012-12-12 MN2	WT	immediate	1	N	4	246.7
2012-12-12 MN2	WT	immediate	2	N	2	91.9
2012-12-12 MN2	WT	immediate	2	N	4	233.1
2012-12-12 MN2	WT	immediate	2	N	5	626.5
2012-12-12 MN2	WT	immediate	2	N	5	467
2012-12-12 MN2	WT	immediate	2	N	3	217.2
2012-12-12 MN2	WT	immediate	3	N	2	92.3
2012-12-12 MN2	WT	immediate	3	N	3	626.6
2012-12-12 MN2	WT	immediate	3	N	4	529.4
2012-12-12 MN2	WT	immediate	3	N	4	646.9
2012-12-12 MN2	WT	immediate	4	N	2	441.1
2012-12-12 MN2	WT	immediate	4	N	2	114
2012-12-12 MN2	WT	immediate	5	N	5	346.5
2012-12-12 MN2	WT	immediate	5	N	5	256.8
2012-12-12 MN2	WT	immediate	5	N	4	220.7
2012-12-12 MN2	WT	immediate	5	N	4	439.1
2012-12-12 MN2	WT	immediate	5	N	5	447.4
2012-12-12 MN2	WT	immediate	5	N	5	481.8
2012-12-12 MN2	WT	immediate	5	N	2	185
2013-01-23 MN1	WT	delayed	1	N	2	526.3
2013-01-23 MN1	WT	delayed	1	N	3	429.1
2013-01-23 MN1	WT	delayed	1	N	3	445
2013-01-23 MN1	WT	delayed	2	N	4	293.8
2013-01-23 MN1	WT	delayed	2	N	6	427.5
2013-01-23 MN1	WT	delayed	2	N	6	559.4
2013-01-23 MN1	WT	delayed	2	N	5	517.9
2013-01-23 MN1	WT	delayed	2	N	3	179.6
2013-01-23 MN1	WT	delayed	2	N	5	340.7
2013-01-23 MN1	WT	delayed	2	N	5	347.8
2013-01-23 MN1	WT	delayed	2	N	4	172.2
2013-01-23 MN1	WT	delayed	2	N	4	505.6
2013-01-23 MN1	WT	delayed	2	N	4	285.5
2013-01-23 MN1	WT	delayed	3	N	4	482.6
2013-01-23 MN1	WT	delayed	3	N	5	447
2013-01-23 MN1	WT	delayed	3	N	5	456.8
2013-01-23 MN1	WT	delayed	3	N	4	491.8
2013-01-23 MN1	WT	delayed	3	N	4	514.9
2013-01-23 MN1	WT	delayed	3	N	2	465.1
2013-01-23 MN1	WT	delayed	4	N	4	366.1
2013-01-23 MN1	WT	delayed	4	N	4	427.8
2013-01-23 MN1	WT	delayed	4	N	5	447.9
2013-01-23 MN1	WT	delayed	4	N	5	326.2
2013-01-23 MN1	WT	delayed	4	N	4	387.5
2013-01-23 MN1	WT	delayed	4	N	3	461.8
2013-01-23 MN1	WT	delayed	4	N	3	469.8
2013-01-23 MN1	WT	delayed	5	N	2	87.5
2013-01-23 MN1	WT	delayed	5	N	5	337.6
2013-01-23 MN1	WT	delayed	5	N	5	270.6
2013-01-23 MN1	WT	delayed	5	N	5	492
2013-01-23 MN1	WT	delayed	5	N	5	575.8
2013-01-23 MN1	WT	delayed	5	N	4	328.2
2013-01-23 MN1	WT	delayed	5	N	4	221.4
2013-01-23 MN1	WT	delayed	6	N	4	148.2
2013-01-23 MN1	WT	delayed	6	N	4	223.7
2013-01-23 MN1	WT	delayed	6	N	4	405.5
2013-01-23 MN1	WT	delayed	6	N	4	384.5
2013-01-23 MN1	WT	delayed	6	N	5	418.1
2013-01-23 MN1	WT	delayed	6	N	5	414
2013-01-23 MN1	WT	delayed	6	N	4	212.3
2013-01-23 MN1	WT	delayed	6	N	3	200.7
2013-01-25 MN1	SOD	immediate	1	N	2	166.4
2013-01-25 MN1	SOD	immediate	1	N	2	80.5
2013-01-25 MN1	SOD	immediate	2	N	2	96.2
2013-01-25 MN1	SOD	immediate	2	N	3	101.2
2013-01-25 MN1	SOD	immediate	2	N	3	60.9
2013-01-25 MN1	SOD	immediate	3	N	2	22
2013-01-25 MN1	SOD	immediate	3	N	2	49
2013-01-25 MN1	SOD	immediate	4	N	1	27.6
2013-01-25 MN1	SOD	immediate	5	N	2	26.1
2013-01-25 MN1	SOD	immediate	5	N	2	40.4
2013-01-25 MN1	SOD	immediate	6	N	1	35.4
2013-01-25 MN1	SOD	immediate	7	N	1	22.1
2013-01-25 MN1	SOD	immediate	8	N	1	67
2013-01-25 MN2	SOD	delayed	1	N	2	200.6
2013-01-25 MN2	SOD	delayed	1	N	3	442
2013-01-25 MN2	SOD	delayed	1	N	4	360.8
2013-01-25 MN2	SOD	delayed	1	N	4	286.7
2013-01-25 MN2	SOD	delayed	2	N	1	466.7
2013-01-25 MN2	SOD	delayed	3	N	4	239.8
2013-01-25 MN2	SOD	delayed	3	N	4	297.2
2013-01-25 MN2	SOD	delayed	3	N	3	299.1
2013-01-25 MN2	SOD	delayed	3	N	2	408.1
2013-01-25 MN2	SOD	delayed	4	N	2	182.1
2013-01-25 MN2	SOD	delayed	4	N	2	204.9
2013-01-25 MN2	SOD	delayed	5	N	2	258.2
2013-01-25 MN2	SOD	delayed	5	N	2	56.1
2013-01-25 MN2	SOD	delayed	6	N	3	251
2013-01-25 MN2	SOD	delayed	6	N	4	505.2
2013-01-25 MN2	SOD	delayed	6	N	4	368
2013-01-25 MN2	SOD	delayed	6	N	3	155.3
2013-01-25 MN2	SOD	delayed	6	N	4	167.4
2013-01-25 MN2	SOD	delayed	6	N	5	252.3
2013-01-25 MN2	SOD	delayed	6	N	7	214.5
2013-01-25 MN2	SOD	delayed	6	N	7	327.2
2013-01-25 MN2	SOD	delayed	6	N	6	195.6
2013-01-25 MN3	SOD	delayed	1	N	3	452.4
2013-01-25 MN3	SOD	delayed	1	N	3	447.5
2013-01-25 MN3	SOD	delayed	1	N	4	311.3
2013-01-25 MN3	SOD	delayed	1	N	4	116.3
2013-01-25 MN3	SOD	delayed	1	N	2	236.5
2013-01-25 MN3	SOD	delayed	2	N	3	642.4
2013-01-25 MN3	SOD	delayed	2	N	4	317.9
2013-01-25 MN3	SOD	delayed	2	N	4	337.7
2013-01-25 MN3	SOD	delayed	2	N	5	300.4
2013-01-25 MN3	SOD	delayed	2	N	5	355.7
2013-01-25 MN3	SOD	delayed	2	N	5	145.5
2013-01-25 MN3	SOD	delayed	2	N	5	155.7
2013-01-25 MN3	SOD	delayed	2	N	5	419
2013-01-25 MN3	SOD	delayed	2	N	5	412.7
2013-01-25 MN3	SOD	delayed	2	N	4	463
2013-01-25 MN3	SOD	delayed	3	N	1	92.2
2013-01-25 MN3	SOD	delayed	4	N	2	96.9
2013-01-25 MN3	SOD	delayed	4	N	4	427.2
2013-01-25 MN3	SOD	delayed	4	N	4	181
2013-01-25 MN3	SOD	delayed	4	N	2	161.9
2013-01-25 MN3	SOD	delayed	5	N	3	138.6
2013-01-25 MN3	SOD	delayed	5	N	4	708.3
2013-01-25 MN3	SOD	delayed	5	N	5	688.9
2013-01-25 MN3	SOD	delayed	5	N	6	714.2
2013-01-25 MN3	SOD	delayed	5	N	6	705.1
2013-01-25 MN3	SOD	delayed	5	N	3	446.3
2013-01-25 MN3	SOD	delayed	5	N	4	358.8
2013-01-25 MN3	SOD	delayed	5	N	5	585.4
2013-01-25 MN3	SOD	delayed	5	N	6	839.9
2013-01-25 MN3	SOD	delayed	5	N	6	523.3
2013-01-25 MN3	SOD	delayed	6	N	2	76
2013-01-25 MN3	SOD	delayed	6	N	3	109.6
2013-01-25 MN3	SOD	delayed	6	N	3	109.6
2013-02-20 MN1	WT	delayed ?	1	N	4	32.9
2013-02-20 MN1	WT	delayed ?	1	N	4	44.6
2013-02-20 MN1	WT	delayed ?	1	N	6	95.6
2013-02-20 MN1	WT	delayed ?	1	N	6	81.3
2013-02-20 MN1	WT	delayed ?	1	N	5	79.9
2013-02-20 MN1	WT	delayed ?	1	N	5	56.8
2013-02-20 MN1	WT	delayed ?	1	N	9	247.7
2013-02-20 MN1	WT	delayed ?	1	N	9	273.6
2013-02-20 MN1	WT	delayed ?	1	N	8	172.3
2013-02-20 MN1	WT	delayed ?	1	N	7	191.9
2013-02-20 MN1	WT	delayed ?	1	N	9	272
2013-02-20 MN1	WT	delayed ?	1	N	10	252.5
2013-02-20 MN1	WT	delayed ?	1	N	10	248.3
2013-02-20 MN1	WT	delayed ?	1	N	8	176.1
2013-02-20 MN1	WT	delayed ?	1	N	8	168.8
2013-02-20 MN1	WT	delayed ?	1	N	10	231.8
2013-02-20 MN1	WT	delayed ?	1	N	11	268
2013-02-20 MN1	WT	delayed ?	1	N	11	260.4
2013-02-20 MN1	WT	delayed ?	1	N	9	198.8
2013-02-20 MN1	WT	delayed ?	2	N	6	136.5
2013-02-20 MN1	WT	delayed ?	2	N	6	146.9
2013-02-20 MN1	WT	delayed ?	2	N	4	120.6
2013-02-20 MN1	WT	delayed ?	2	N	2	88.9
2013-02-20 MN1	WT	delayed ?	3	N	3	234.9
2013-02-20 MN1	WT	delayed ?	3	N	4	239.6
2013-02-20 MN1	WT	delayed ?	3	N	4	177.5
2013-02-20 MN1	WT	delayed ?	3	N	2	35.5
2013-02-20 MN1	WT	delayed ?	4	N	2	256
2013-02-20 MN1	WT	delayed ?	4	N	3	95.3
2013-02-20 MN1	WT	delayed ?	4	N	4	204
2013-02-20 MN1	WT	delayed ?	4	N	4	137.6
2013-02-20 MN1	WT	delayed ?	5	N	3	206.9
2013-02-20 MN1	WT	delayed ?	5	N	3	196.1
2013-02-20 MN1	WT	delayed ?	5	N	4	291.2
2013-02-20 MN1	WT	delayed ?	5	N	4	203.4
2013-02-20 MN1	WT	delayed ?	5	N	3	96.3
2013-02-20 MN1	WT	delayed ?	6	N	1	10.9
2013-02-20 MN1	WT	delayed ?	7	N	1	61.2
2013-02-25 MN1	SOD	delayed	1	N	5	224.8
2013-02-25 MN1	SOD	delayed	1	N	5	288.4
2013-02-25 MN1	SOD	delayed	1	N	4	107.4
2013-02-25 MN1	SOD	delayed	1	N	5	199.3
2013-02-25 MN1	SOD	delayed	1	N	6	135.7
2013-02-25 MN1	SOD	delayed	1	N	6	160.1
2013-02-25 MN1	SOD	delayed	1	N	6	178.9
2013-02-25 MN1	SOD	delayed	1	N	6	181.5
2013-02-25 MN1	SOD	delayed	1	N	6	147.3
2013-02-25 MN1	SOD	delayed	1	N	3	243.9
2013-02-25 MN1	SOD	delayed	1	N	3	115
2013-02-25 MN1	SOD	delayed	2	N	4	258.7
2013-02-25 MN1	SOD	delayed	2	N	4	257.9
2013-02-25 MN1	SOD	delayed	2	N	3	89.6
2013-02-25 MN1	SOD	delayed	3	N	2	266.2
2013-02-25 MN1	SOD	delayed	3	N	2	180.4
2013-02-25 MN1	SOD	delayed	4	N	1	357.8
2013-02-25 MN1	SOD	delayed	5	N	4	302
2013-02-25 MN1	SOD	delayed	5	N	4	277.3
2013-02-25 MN1	SOD	delayed	5	N	3	138.9
2013-02-25 MN1	SOD	delayed	5	N	5	190.5
2013-02-25 MN1	SOD	delayed	5	N	5	166
2013-02-25 MN1	SOD	delayed	5	N	4	87.8
2013-02-25 MN1	SOD	delayed	5	N	3	42.7
2013-02-25 MN1	SOD	delayed	6	N	1	43.3
2013-02-25 MN1	SOD	delayed	7	N	2	223.7
2013-02-25 MN1	SOD	delayed	7	N	3	287.9
2013-02-25 MN1	SOD	delayed	7	N	3	149.3
2013-02-26 MN3	SOD	immediate	1	N	5	106.7
2013-02-26 MN3	SOD	immediate	1	N	5	97.8
2013-02-26 MN3	SOD	immediate	1	N	4	79.8
2013-02-26 MN3	SOD	immediate	1	N	7	128
2013-02-26 MN3	SOD	immediate	1	N	7	123.3
2013-02-26 MN3	SOD	immediate	1	N	6	137.4
2013-02-26 MN3	SOD	immediate	1	N	5	127.8
2013-02-26 MN3	SOD	immediate	1	N	5	109.3
2013-02-26 MN3	SOD	immediate	1	N	6	111.3
2013-02-26 MN3	SOD	immediate	1	N	6	112.7
2013-02-26 MN3	SOD	immediate	1	N	3	50.3
2013-02-26 MN3	SOD	immediate	1	N	3	74.7
2013-02-26 MN3	SOD	immediate	2	N	3	71.5
2013-02-26 MN3	SOD	immediate	2	N	3	81.7
2013-02-26 MN3	SOD	immediate	2	N	2	76.5
2013-02-26 MN3	SOD	immediate	3	N	2	97.1
2013-02-26 MN3	SOD	immediate	3	N	2	83
2013-02-26 MN3	SOD	immediate	4	N	1	49.7
2013-02-26 MN3	SOD	immediate	5	N	1	215.6
2013-02-26 MN3	SOD	immediate	6	N	5	161.9
2013-02-26 MN3	SOD	immediate	6	N	5	123.5
2013-02-26 MN3	SOD	immediate	6	N	4	67.1
2013-02-26 MN3	SOD	immediate	6	N	4	98.2
2013-02-26 MN3	SOD	immediate	6	N	4	93.9
2013-02-26 MN3	SOD	immediate	6	N	2	170.8
2013-02-26 MN3	SOD	immediate	7	N	3	151.9
2013-02-26 MN3	SOD	immediate	7	N	3	174.9
2013-02-26 MN3	SOD	immediate	7	N	3	113
2013-02-26 MN3	SOD	immediate	7	N	4	136
2013-02-26 MN3	SOD	immediate	7	N	4	102.1
2013-02-26 MN3	SOD	immediate	8	N	2	23.2
2013-02-26 MN3	SOD	immediate	8	N	4	132.7
2013-02-26 MN3	SOD	immediate	8	N	5	207.1
2013-02-26 MN3	SOD	immediate	8	N	5	191
2013-02-26 MN3	SOD	immediate	8	N	5	78.2
2013-02-26 MN3	SOD	immediate	8	N	5	79.9
2013-02-26 MN3	SOD	immediate	8	N	5	130.5
2013-02-26 MN3	SOD	immediate	8	N	7	127.7
2013-02-26 MN3	SOD	immediate	8	N	7	163.5
2013-02-26 MN3	SOD	immediate	8	N	6	98.3
2013-02-26 MN3	SOD	immediate	9	N	3	51.1
2013-02-26 MN3	SOD	immediate	9	N	3	42.6
2013-02-26 MN3	SOD	immediate	9	N	4	121.6
2013-02-26 MN3	SOD	immediate	9	N	5	191.8
2013-02-26 MN3	SOD	immediate	9	N	5	127.6
2013-02-26 MN3	SOD	immediate	9	N	3	38.2
2013-02-26 MN3	SOD	immediate	10	N	1	25.2
2013-02-26 MN3	SOD	immediate	11	N	1	50.3
2013-02-26 MN3	SOD	immediate	12	N	2	93.4
2013-02-26 MN3	SOD	immediate	12	N	3	93.5
2013-02-26 MN3	SOD	immediate	12	N	4	79.9
2013-02-26 MN3	SOD	immediate	12	N	4	116.8
2013-02-26 MN3	SOD	immediate	13	N	1	30.4
2013-02-26 MN4	SOD	delayed	1	N	2	195.1
2013-02-26 MN4	SOD	delayed	1	N	2	198
2013-02-26 MN4	SOD	delayed	2	N	1	392.5
2013-02-26 MN4	SOD	delayed	3	N	3	211.7
2013-02-26 MN4	SOD	delayed	3	N	3	149.4
2013-02-26 MN4	SOD	delayed	3	N	2	152.9
2013-02-26 MN4	SOD	delayed	4	N	1	59.2
2013-02-26 MN4	SOD	delayed	5	N	3	172.3
2013-02-26 MN4	SOD	delayed	5	N	3	113.4
2013-02-26 MN4	SOD	delayed	5	N	3	236.7
2013-02-26 MN4	SOD	delayed	5	N	6	227.1
2013-02-26 MN4	SOD	delayed	5	N	6	206.3
2013-02-26 MN4	SOD	delayed	5	N	5	180.4
2013-02-26 MN4	SOD	delayed	5	N	5	150.3
2013-02-26 MN4	SOD	delayed	5	N	5	175.4
2013-02-26 MN4	SOD	delayed	6	N	3	264.4
2013-02-26 MN4	SOD	delayed	6	N	3	110.9
2013-02-26 MN4	SOD	delayed	6	N	3	218.4
2013-02-26 MN4	SOD	delayed	6	N	3	133.3
2013-02-26 MN4	SOD	delayed	7	N	2	58.2
2013-02-26 MN4	SOD	delayed	7	N	4	117.5
2013-02-26 MN4	SOD	delayed	7	N	4	169.3
2013-02-26 MN4	SOD	delayed	7	N	5	98.8
2013-02-26 MN4	SOD	delayed	7	N	5	209.2
2013-02-26 MN4	SOD	delayed	7	N	4	82.1
2013-02-26 MN4	SOD	delayed	8	N	3	144.2
2013-02-26 MN4	SOD	delayed	8	N	5	236.8
2013-02-26 MN4	SOD	delayed	8	N	5	273.2
2013-02-26 MN4	SOD	delayed	8	N	5	101.6
2013-02-26 MN4	SOD	delayed	8	N	6	165.4
2013-02-26 MN4	SOD	delayed	8	N	7	201.9
2013-02-26 MN4	SOD	delayed	8	N	7	248.9
2013-02-26 MN4	SOD	delayed	8	N	4	185.3
2013-02-26 MN4	SOD	delayed	8	N	4	197.9
2013-02-26 MN4	SOD	delayed	8	N	3	177.1
2013-02-26 MN5	SOD	immediate	1	N	2	73.8
2013-02-26 MN5	SOD	immediate	1	N	2	59.7
2013-02-26 MN5	SOD	immediate	2	N	3	147.2
2013-02-26 MN5	SOD	immediate	2	N	3	199.3
2013-02-26 MN5	SOD	immediate	2	N	2	114.8
2013-02-26 MN5	SOD	immediate	3	N	2	47.3
2013-02-26 MN5	SOD	immediate	3	N	2	56.9
2013-02-26 MN5	SOD	immediate	4	N	4	51.3
2013-02-26 MN5	SOD	immediate	4	N	5	155.9
2013-02-26 MN5	SOD	immediate	4	N	5	134.9
2013-02-26 MN5	SOD	immediate	4	N	4	54.5
2013-02-26 MN5	SOD	immediate	4	N	4	112
2013-02-26 MN5	SOD	immediate	4	N	4	102.2
2013-02-26 MN5	SOD	immediate	4	N	4	160.2
2013-02-26 MN5	SOD	immediate	4	N	4	107
2013-02-26 MN5	SOD	immediate	4	N	4	145.1
2013-02-26 MN5	SOD	immediate	5	N	3	96.6
2013-02-26 MN5	SOD	immediate	5	N	3	214.1
2013-02-26 MN5	SOD	immediate	5	N	5	137.1
2013-02-26 MN5	SOD	immediate	5	N	5	173.2
2013-02-26 MN5	SOD	immediate	5	N	5	175.4
2013-02-26 MN5	SOD	immediate	5	N	5	145.9
2013-02-26 MN5	SOD	immediate	5	N	5	81.6
2013-02-26 MN5	SOD	immediate	5	N	5	147.9
2013-02-26 MN5	SOD	immediate	5	N	5	204.5
2013-02-26 MN5	SOD	immediate	5	N	5	198.4
2013-02-26 MN5	SOD	immediate	6	N	1	11
2013-02-26 MN5	SOD	immediate	7	N	2	107.3
2013-02-26 MN5	SOD	immediate	7	N	2	118.6
2013-02-26 MN5	SOD	immediate	8	N	5	136.1
2013-02-26 MN5	SOD	immediate	8	N	5	94.5
2013-02-26 MN5	SOD	immediate	8	N	6	73.4
2013-02-26 MN5	SOD	immediate	8	N	6	68.1
2013-02-26 MN5	SOD	immediate	8	N	7	230
2013-02-26 MN5	SOD	immediate	8	N	7	239.7
2013-02-26 MN5	SOD	immediate	8	N	7	195.4
2013-02-26 MN5	SOD	immediate	8	N	6	165.4
2013-02-26 MN5	SOD	immediate	8	N	6	81.3
2013-02-26 MN5	SOD	immediate	8	N	6	145.4
2013-02-26 MN5	SOD	immediate	8	N	6	165.9
2013-02-26 MN5	SOD	immediate	8	N	4	51.6
2013-02-26 MN5	SOD	immediate	8	N	6	67.5
2013-02-26 MN5	SOD	immediate	8	N	6	80.6
2013-02-26 MN5	SOD	immediate	8	N	5	86.9
2013-02-26 MN5	SOD	immediate	8	N	5	88.1
2013-02-26 MN5	SOD	immediate	8	N	5	204.3
2013-02-26 MN5	SOD	immediate	8	G	3	70.3
2013-02-26 MN5	SOD	immediate	8	G	4	72.2
2013-02-26 MN5	SOD	immediate	8	N	5	116.3
2013-02-26 MN5	SOD	immediate	8	N	5	95.4
2013-02-26 MN5	SOD	immediate	9	N	2	34.7
2013-02-26 MN5	SOD	immediate	9	N	3	51.6
2013-02-26 MN5	SOD	immediate	9	N	3	37.4
2013-08-28 MN2	SOD	delayed	1	N	4	174.6
2013-08-28 MN2	SOD	delayed	1	N	4	182.7
2013-08-28 MN2	SOD	delayed	1	N	4	202.3
2013-08-28 MN2	SOD	delayed	1	N	5	352.8
2013-08-28 MN2	SOD	delayed	1	N	5	291.3
2013-08-28 MN2	SOD	delayed	1	N	2	24
2013-08-28 MN2	SOD	delayed	2	N	3	143.3
2013-08-28 MN2	SOD	delayed	2	N	3	125.2
2013-08-28 MN2	SOD	delayed	2	N	5	240.1
2013-08-28 MN2	SOD	delayed	2	N	5	180.7
2013-08-28 MN2	SOD	delayed	2	N	4	127.3
2013-08-28 MN2	SOD	delayed	2	N	3	280.1
2013-08-28 MN2	SOD	delayed	3	N	4	275.3
2013-08-28 MN2	SOD	delayed	3	N	5	308.3
2013-08-28 MN2	SOD	delayed	3	N	5	302
2013-08-28 MN2	SOD	delayed	3	N	4	222.1
2013-08-28 MN2	SOD	delayed	3	N	5	253.7
2013-08-28 MN2	SOD	delayed	3	N	5	141
2013-08-28 MN2	SOD	delayed	3	N	5	329.6
2013-08-28 MN2	SOD	delayed	3	N	5	259.2
2013-08-28 MN2	SOD	delayed	3	N	4	220.3
2013-08-28 MN2	SOD	delayed	3	N	5	266.3
2013-08-28 MN2	SOD	delayed	3	N	5	334
2013-08-28 MN2	SOD	delayed	3	N	4	142.4
2013-08-28 MN2	SOD	delayed	4	N	3	86.9
2013-08-28 MN2	SOD	delayed	4	N	4	235.9
2013-08-28 MN2	SOD	delayed	4	N	4	265.8
2013-08-28 MN2	SOD	delayed	4	N	3	300.3
2013-08-28 MN2	SOD	delayed	4	N	3	25.9
2013-08-28 MN2	SOD	delayed	5	N	2	228.3
2013-08-28 MN2	SOD	delayed	5	N	2	108.6
2013-08-28 MN2	SOD	delayed	6	N	1	260.1
2013-08-28 MN2	SOD	delayed	7	N	3	115.1
2013-08-28 MN2	SOD	delayed	7	N	3	85.2
2013-08-28 MN2	SOD	delayed	7	N	5	160.1
2013-08-28 MN2	SOD	delayed	7	N	6	211.3
2013-08-28 MN2	SOD	delayed	7	N	7	338.4
2013-08-28 MN2	SOD	delayed	7	N	7	333.5
2013-08-28 MN2	SOD	delayed	7	N	5	87.2
2013-08-28 MN2	SOD	delayed	7	N	5	101.3
2013-08-28 MN2	SOD	delayed	7	N	5	69.6
2013-08-28 MN2	SOD	delayed	7	N	5	87.4
2013-08-28 MN2	SOD	delayed	7	N	4	82
2013-08-28 MN3	SOD	delayed	1	N	5	520.4
2013-08-28 MN3	SOD	delayed	1	N	6	437.7
2013-08-28 MN3	SOD	delayed	1	N	6	272.7
2013-08-28 MN3	SOD	delayed	1	N	4	412.1
2013-08-28 MN3	SOD	delayed	1	N	4	414.3
2013-08-28 MN3	SOD	delayed	1	N	5	416.6
2013-08-28 MN3	SOD	delayed	1	N	5	428.4
2013-08-28 MN3	SOD	delayed	1	N	2	239.9
2013-08-28 MN3	SOD	delayed	2	N	3	178.2
2013-08-28 MN3	SOD	delayed	2	N	4	194.8
2013-08-28 MN3	SOD	delayed	2	N	4	199.7
2013-08-28 MN3	SOD	delayed	2	N	2	83.6
2013-08-28 MN3	SOD	delayed	3	N	1	50.7
2013-08-28 MN3	SOD	delayed	4	N	4	408.8
2013-08-28 MN3	SOD	delayed	4	N	4	458.2
2013-08-28 MN3	SOD	delayed	4	N	3	90.1
2013-08-28 MN3	SOD	delayed	4	N	8	285.1
2013-08-28 MN3	SOD	delayed	4	N	8	280
2013-08-28 MN3	SOD	delayed	4	N	9	269.7
2013-08-28 MN3	SOD	delayed	4	N	6	366.4
2013-08-28 MN3	SOD	delayed	4	N	6	338.2
2013-08-28 MN3	SOD	delayed	4	N	4	154.3
2013-08-28 MN3	SOD	delayed	4	N	4	292.8
2013-08-28 MN3	SOD	delayed	4	N	5	460
2013-08-28 MN3	SOD	delayed	4	N	5	384.3
2013-08-28 MN3	SOD	delayed	5	N	5	313.8
2013-08-28 MN3	SOD	delayed	5	N	5	342.8
2013-08-28 MN3	SOD	delayed	5	N	4	317.8
2013-08-28 MN3	SOD	delayed	5	N	3	104.2
2013-08-28 MN3	SOD	delayed	5	N	10	364.1
2013-08-28 MN3	SOD	delayed	5	N	10	358.4
2013-08-28 MN3	SOD	delayed	5	N	9	353.5
2013-08-28 MN3	SOD	delayed	5	N	9	524.4
2013-08-28 MN3	SOD	delayed	5	N	9	292.7
2013-08-28 MN3	SOD	delayed	5	N	7	256.4
2013-08-28 MN3	SOD	delayed	5	N	6	247.5
2013-08-28 MN3	SOD	delayed	5	N	7	428.8
2013-08-28 MN3	SOD	delayed	5	N	7	281.9
2013-08-28 MN3	SOD	delayed	5	N	7	362.3
2013-08-28 MN3	SOD	delayed	5	N	7	372.2
2013-08-28 MN3	SOD	delayed	5	N	6	213.5
2013-08-28 MN3	SOD	delayed	5	N	6	176.7
2013-08-28 MN3	SOD	delayed	5	N	5	104.8
2013-08-28 MN3	SOD	delayed	5	N	3	419.3
2013-08-28 MN3	SOD	delayed	6	N	6	394.8
2013-08-28 MN3	SOD	delayed	6	N	6	287.4
2013-08-28 MN3	SOD	delayed	6	N	5	274.9
2013-08-28 MN3	SOD	delayed	6	N	4	157.3
2013-08-28 MN3	SOD	delayed	6	N	3	257.2
2013-08-28 MN3	SOD	delayed	6	N	3	534.8
2013-08-28 MN3	SOD	delayed	6	N	4	475.5
2013-08-28 MN3	SOD	delayed	6	N	4	493.4
2013-08-29 MN3	SOD	delayed	1	N	3	221.4
2013-08-29 MN3	SOD	delayed	1	N	3	132.9
2013-08-29 MN3	SOD	delayed	1	N	7	316.3
2013-08-29 MN3	SOD	delayed	1	N	8	343.2
2013-08-29 MN3	SOD	delayed	1	N	8	435.8
2013-08-29 MN3	SOD	delayed	1	N	8	453
2013-08-29 MN3	SOD	delayed	1	N	8	410.4
2013-08-29 MN3	SOD	delayed	1	N	7	311.6
2013-08-29 MN3	SOD	delayed	1	N	5	355.7
2013-08-29 MN3	SOD	delayed	1	N	4	103.1
2013-08-29 MN3	SOD	delayed	1	N	3	73.1
2013-08-29 MN3	SOD	delayed	2	N	5	160.9
2013-08-29 MN3	SOD	delayed	2	N	5	111.6
2013-08-29 MN3	SOD	delayed	2	N	4	461
2013-08-29 MN3	SOD	delayed	2	N	3	67.4
2013-08-29 MN3	SOD	delayed	2	N	3	73.4
2013-08-29 MN3	SOD	delayed	2	N	3	56
2013-08-29 MN3	SOD	delayed	3	N	2	172
2013-08-29 MN3	SOD	delayed	3	N	5	305.8
2013-08-29 MN3	SOD	delayed	3	N	5	253
2013-08-29 MN3	SOD	delayed	3	N	5	316.4
2013-08-29 MN3	SOD	delayed	3	N	6	298.3
2013-08-29 MN3	SOD	delayed	3	N	6	287.3
2013-08-29 MN3	SOD	delayed	3	N	4	239.8
2013-08-29 MN3	SOD	delayed	3	N	4	289.3
2013-08-29 MN3	SOD	delayed	4	N	1	175.5
2013-08-29 MN3	SOD	delayed	5	N	2	124
2013-08-29 MN3	SOD	delayed	5	N	4	345.9
2013-08-29 MN3	SOD	delayed	5	N	4	367.8
2013-08-29 MN3	SOD	delayed	5	N	4	263.6
2013-08-29 MN3	SOD	delayed	5	N	4	319.2
2013-08-29 MN3	SOD	delayed	5	N	5	405.9
2013-08-29 MN3	SOD	delayed	5	N	6	372.3
2013-08-29 MN3	SOD	delayed	5	N	6	315.3
2013-08-29 MN3	SOD	delayed	6	N	4	304.3
2013-08-29 MN3	SOD	delayed	6	N	4	341.4
2013-08-29 MN3	SOD	delayed	6	N	3	215.7
2013-08-29 MN3	SOD	delayed	6	N	3	212.8
2013-08-29 MN3	SOD	delayed	6	N	4	147.3
2013-08-29 MN3	SOD	delayed	6	N	5	265.3
2013-08-29 MN3	SOD	delayed	6	N	5	294.9
2013-08-29 MN3	SOD	delayed	7	N	2	297.8
2013-08-29 MN3	SOD	delayed	7	N	2	243
2013-08-29 MN4	SOD	delayed	1	N	5	315.7
2013-08-29 MN4	SOD	delayed	1	N	5	293.8
2013-08-29 MN4	SOD	delayed	1	N	5	215.7
2013-08-29 MN4	SOD	delayed	1	N	5	259.4
2013-08-29 MN4	SOD	delayed	1	N	4	298.2
2013-08-29 MN4	SOD	delayed	1	N	5	343.3
2013-08-29 MN4	SOD	delayed	1	N	5	341.8
2013-08-29 MN4	SOD	delayed	1	N	4	318.1
2013-08-29 MN4	SOD	delayed	1	N	4	296.3
2013-08-29 MN4	SOD	delayed	1	N	6	404.1
2013-08-29 MN4	SOD	delayed	1	N	6	306.7
2013-08-29 MN4	SOD	delayed	1	N	5	348.5
2013-08-29 MN4	SOD	delayed	1	N	4	241.6
2013-08-29 MN4	SOD	delayed	1	N	9	440.6
2013-08-29 MN4	SOD	delayed	1	N	9	372
2013-08-29 MN4	SOD	delayed	1	N	8	408.5
2013-08-29 MN4	SOD	delayed	1	N	7	378.4
2013-08-29 MN4	SOD	delayed	1	N	6	288.8
2013-08-29 MN4	SOD	delayed	1	N	7	334.8
2013-08-29 MN4	SOD	delayed	1	N	7	355.2
2013-08-29 MN4	SOD	delayed	1	N	7	352.8
2013-08-29 MN4	SOD	delayed	1	N	7	328.2
2013-08-29 MN4	SOD	delayed	2	N	3	271.5
2013-08-29 MN4	SOD	delayed	2	N	3	268.5
2013-08-29 MN4	SOD	delayed	2	N	2	173.2
2013-08-29 MN4	SOD	delayed	3	N	2	281.3
2013-08-29 MN4	SOD	delayed	3	N	2	341.9
2013-08-29 MN4	SOD	delayed	4	N	2	30.3
2013-08-29 MN4	SOD	delayed	4	N	4	443.5
2013-08-29 MN4	SOD	delayed	4	N	4	354.3
2013-08-29 MN4	SOD	delayed	4	N	4	427.1
2013-08-29 MN4	SOD	delayed	4	N	5	444.2
2013-08-29 MN4	SOD	delayed	4	N	5	392.9
2013-08-29 MN4	SOD	delayed	5	N	4	376.1
2013-08-29 MN4	SOD	delayed	5	N	4	472.8
2013-08-29 MN4	SOD	delayed	5	N	4	399.4
2013-08-29 MN4	SOD	delayed	5	N	6	532.3
2013-08-29 MN4	SOD	delayed	5	N	5	503.1
2013-08-29 MN4	SOD	delayed	5	N	3	385.4
2013-08-29 MN4	SOD	delayed	5	N	5	344.2
2013-08-29 MN4	SOD	delayed	5	N	5	267.7
2013-08-29 MN4	SOD	delayed	5	N	4	81.4
2013-08-29 MN4	SOD	delayed	6	N	5	451.1
2013-08-29 MN4	SOD	delayed	6	N	7	451.7
2013-08-29 MN4	SOD	delayed	6	N	7	503.2
2013-08-29 MN4	SOD	delayed	6	N	9	294.1
2013-08-29 MN4	SOD	delayed	6	N	9	393.1
2013-08-29 MN4	SOD	delayed	6	N	8	374.6
2013-08-29 MN4	SOD	delayed	6	N	9	376.8
2013-08-29 MN4	SOD	delayed	6	N	9	352.7
2013-08-29 MN4	SOD	delayed	6	N	8	356.7
2013-08-29 MN4	SOD	delayed	6	N	4	35.9
2013-08-29 MN4	SOD	delayed	6	N	5	292.8
2013-08-29 MN4	SOD	delayed	6	N	5	319.1
2013-08-29 MN4	SOD	delayed	6	N	4	494.6
2013-08-29 MN4	SOD	delayed	6	N	4	475.9
2013-08-29 MN4	SOD	delayed	6	N	4	435.5
2013-08-29 MN4	SOD	delayed	6	N	3	48.6
2013-08-29 MN6	SOD	immediate	1	N	2	119.5
2013-08-29 MN6	SOD	immediate	2	N	2	323.3
2013-08-29 MN6	SOD	immediate	2	N	3	316.4
2013-08-29 MN6	SOD	immediate	2	N	7	280
2013-08-29 MN6	SOD	immediate	2	N	8	361.5
2013-08-29 MN6	SOD	immediate	2	N	8	393
2013-08-29 MN6	SOD	immediate	2	N	6	277.1
2013-08-29 MN6	SOD	immediate	2	N	7	337.9
2013-08-29 MN6	SOD	immediate	2	N	7	375.2
2013-08-29 MN6	SOD	immediate	2	N	6	250.2
2013-08-29 MN6	SOD	immediate	2	N	4	322.8
2013-08-29 MN6	SOD	immediate	2	N	3	314.7
2013-08-29 MN6	SOD	immediate	2	N	3	122.9
2013-08-29 MN6	SOD	immediate	3	N	6	191.9
2013-08-29 MN6	SOD	immediate	3	N	6	194.6
2013-08-29 MN6	SOD	immediate	3	N	5	177.2
2013-08-29 MN6	SOD	immediate	3	N	4	202.5
2013-08-29 MN6	SOD	immediate	3	N	4	89.5
2013-08-29 MN6	SOD	immediate	3	N	4	82.3
2013-08-29 MN6	SOD	immediate	3	N	3	85.5
2013-08-29 MN6	SOD	immediate	3	N	3	311
2013-08-30 MN2	SOD	delayed	1	N	5	243.1
2013-08-30 MN2	SOD	delayed	1	N	5	279.4
2013-08-30 MN2	SOD	delayed	1	N	5	322.4
2013-08-30 MN2	SOD	delayed	1	N	5	259.1
2013-08-30 MN2	SOD	delayed	1	N	4	121.3
2013-08-30 MN2	SOD	delayed	1	N	6	356.1
2013-08-30 MN2	SOD	delayed	1	N	6	481.1
2013-08-30 MN2	SOD	delayed	1	N	6	252
2013-08-30 MN2	SOD	delayed	1	N	6	504.1
2013-08-30 MN2	SOD	delayed	1	N	2	47.1
2013-08-30 MN2	SOD	delayed	1	N	4	301.8
2013-08-30 MN2	SOD	delayed	1	N	4	265.9
2013-08-30 MN2	SOD	delayed	1	N	3	196.2
2013-08-30 MN2	SOD	delayed	2	N	4	201.6
2013-08-30 MN2	SOD	delayed	2	N	5	390
2013-08-30 MN2	SOD	delayed	2	N	8	451
2013-08-30 MN2	SOD	delayed	2	N	8	356.7
2013-08-30 MN2	SOD	delayed	2	N	7	345.3
2013-08-30 MN2	SOD	delayed	2	N	7	242.6
2013-08-30 MN2	SOD	delayed	2	N	7	277.7
2013-08-30 MN2	SOD	delayed	2	N	4	157
2013-08-30 MN2	SOD	delayed	2	N	4	248.4
2013-08-30 MN2	SOD	delayed	2	N	2	133.5
2013-08-30 MN2	SOD	delayed	3	N	3	457.1
2013-08-30 MN2	SOD	delayed	3	N	3	424.9
2013-08-30 MN2	SOD	delayed	3	N	4	311.2
2013-08-30 MN2	SOD	delayed	3	N	4	261.9
2013-08-30 MN2	SOD	delayed	3	N	3	140.5
2013-08-30 MN2	SOD	delayed	4	N	4	536.1
2013-08-30 MN2	SOD	delayed	4	N	4	249.4
2013-08-30 MN2	SOD	delayed	4	N	4	399.8
2013-08-30 MN2	SOD	delayed	4	N	6	433.8
2013-08-30 MN2	SOD	delayed	4	N	6	456.4
2013-08-30 MN2	SOD	delayed	4	N	5	486.6
2013-08-30 MN2	SOD	delayed	4	N	3	477.7
2013-08-30 MN2	SOD	delayed	4	N	3	473.8
2013-08-30 MN2	SOD	delayed	5	N	6	437.6
2013-08-30 MN2	SOD	delayed	5	N	6	472.1
2013-08-30 MN2	SOD	delayed	5	N	5	402.7
2013-08-30 MN2	SOD	delayed	5	N	4	451.9
2013-08-30 MN2	SOD	delayed	5	N	3	605.7
2013-08-30 MN2	SOD	delayed	5	N	5	278.7
2013-08-30 MN2	SOD	delayed	5	N	5	322.7
2013-08-30 MN2	SOD	delayed	5	N	5	243.1
2013-08-30 MN2	SOD	delayed	5	N	6	297.7
2013-08-30 MN2	SOD	delayed	5	N	6	286.7
2013-08-30 MN2	SOD	delayed	5	N	3	446.9
2013-08-30 MN2	SOD	delayed	6	N	3	472.8
2013-08-30 MN2	SOD	delayed	6	N	4	559.3
2013-08-30 MN2	SOD	delayed	6	N	4	404.8
2013-08-30 MN2	SOD	delayed	6	N	5	495.9
2013-08-30 MN2	SOD	delayed	6	N	6	378.9
2013-08-30 MN2	SOD	delayed	6	N	6	339.1
2013-08-30 MN2	SOD	delayed	6	N	5	442.1
2013-08-30 MN2	SOD	delayed	6	N	5	416.1
2013-08-30 MN2	SOD	delayed	6	N	4	609.7
2013-08-30 MN2	SOD	delayed	6	N	8	562.4
2013-08-30 MN2	SOD	delayed	6	N	8	410.9
2013-08-30 MN2	SOD	delayed	6	N	7	361.3
2013-08-30 MN2	SOD	delayed	6	N	6	330.7
2013-08-30 MN2	SOD	delayed	6	N	6	266.2
2013-08-30 MN2	SOD	delayed	6	N	8	604.2
2013-08-30 MN2	SOD	delayed	6	N	8	464.7
2013-08-30 MN2	SOD	delayed	6	N	7	334.1
2013-08-30 MN3	SOD	delayed	1	N	3	576.4
2013-08-30 MN3	SOD	delayed	1	N	3	287.2
2013-08-30 MN3	SOD	delayed	1	N	3	546.1
2013-08-30 MN3	SOD	delayed	1	N	3	534.8
2013-08-30 MN3	SOD	delayed	2	N	5	299.2
2013-08-30 MN3	SOD	delayed	2	N	5	480.9
2013-08-30 MN3	SOD	delayed	2	N	4	277.5
2013-08-30 MN3	SOD	delayed	2	N	3	75.9
2013-08-30 MN3	SOD	delayed	2	N	4	152.5
2013-08-30 MN3	SOD	delayed	2	N	5	374.8
2013-08-30 MN3	SOD	delayed	2	N	5	547.9
2013-08-30 MN3	SOD	delayed	2	N	4	164.3
2013-08-30 MN3	SOD	delayed	2	N	5	192.3
2013-08-30 MN3	SOD	delayed	2	N	5	189.9
2013-08-30 MN3	SOD	delayed	3	N	7	612.2
2013-08-30 MN3	SOD	delayed	3	N	7	627.1
2013-08-30 MN3	SOD	delayed	3	N	6	559.3
2013-08-30 MN3	SOD	delayed	3	N	5	503.4
2013-08-30 MN3	SOD	delayed	3	N	4	325.8
2013-08-30 MN3	SOD	delayed	3	N	3	101.9
2013-08-30 MN3	SOD	delayed	3	N	4	166.9
2013-08-30 MN3	SOD	delayed	3	N	5	355.1
2013-08-30 MN3	SOD	delayed	3	N	6	355.1
2013-08-30 MN3	SOD	delayed	3	N	6	195.4
2013-08-30 MN3	SOD	delayed	3	N	5	245.3
2013-08-30 MN3	SOD	delayed	3	N	7	628.5
2013-08-30 MN3	SOD	delayed	3	N	7	583.4
2013-08-30 MN3	SOD	delayed	3	N	7	540.1
2013-08-30 MN3	SOD	delayed	3	N	7	370.8
2013-08-30 MN3	SOD	delayed	3	N	5	186.1
2013-08-30 MN3	SOD	delayed	3	N	5	343.5
2013-08-30 MN3	SOD	delayed	4	N	4	464.6
2013-08-30 MN3	SOD	delayed	4	N	5	249.2
2013-08-30 MN3	SOD	delayed	4	N	6	488.4
2013-08-30 MN3	SOD	delayed	4	N	7	430.4
2013-08-30 MN3	SOD	delayed	4	N	8	462.4
2013-08-30 MN3	SOD	delayed	4	N	8	476.3
2013-08-30 MN3	SOD	delayed	4	N	4	131.9
2013-08-30 MN3	SOD	delayed	4	N	4	92.4
2013-08-30 MN3	SOD	delayed	4	N	5	271.7
2013-08-30 MN3	SOD	delayed	4	N	5	251.9
2013-08-30 MN3	SOD	delayed	4	N	5	421.2
2013-08-30 MN3	SOD	delayed	4	N	7	428
2013-08-30 MN3	SOD	delayed	4	N	7	425.2
2013-08-30 MN3	SOD	delayed	4	N	6	394.5
2013-08-30 MN3	SOD	delayed	4	N	4	271.5
2013-08-30 MN3	SOD	delayed	4	N	4	144.5
2013-08-30 MN3	SOD	delayed	5	N	3	361.9
2013-08-30 MN3	SOD	delayed	5	N	3	201
2013-08-30 MN3	SOD	delayed	5	N	3	323.6
2013-08-30 MN3	SOD	delayed	5	N	3	369.3
2013-08-30 MN3	SOD	delayed	6	N	3	270.3
2013-08-30 MN3	SOD	delayed	6	N	3	246.6
2013-08-30 MN3	SOD	delayed	6	N	4	519.8
2013-08-30 MN3	SOD	delayed	6	N	4	320.1
2013-08-30 MN3	SOD	delayed	6	N	3	488.6
2013-08-30 MN3	SOD	delayed	7	N	3	286.1
2013-08-30 MN3	SOD	delayed	7	N	3	216.3
2013-08-30 MN3	SOD	delayed	7	N	4	377.2
2013-08-30 MN3	SOD	delayed	7	N	6	321.2
2013-08-30 MN3	SOD	delayed	7	N	6	226.6
2013-08-30 MN3	SOD	delayed	7	N	6	361.6
2013-08-30 MN3	SOD	delayed	7	N	6	331.9
2013-08-30 MN3	SOD	delayed	7	N	4	155.1
2013-08-30 MN3	SOD	delayed	7	N	4	370.9
2013-11-22 MN1	WT	immediate	1	N	2	104.3
2013-11-22 MN1	WT	immediate	1	N	5	288.5
2013-11-22 MN1	WT	immediate	1	N	6	271
2013-11-22 MN1	WT	immediate	1	N	6	217.6
2013-11-22 MN1	WT	immediate	1	N	4	124.8
2013-11-22 MN1	WT	immediate	1	N	3	187.8
2013-11-22 MN1	WT	immediate	1	N	2	77.7
2013-11-22 MN1	WT	immediate	2	N	3	32
2013-11-22 MN1	WT	immediate	2	N	3	45.8
2013-11-22 MN1	WT	immediate	2	N	4	217.6
2013-11-22 MN1	WT	immediate	2	N	5	243.9
2013-11-22 MN1	WT	immediate	2	N	5	236.2
2013-11-22 MN1	WT	immediate	2	N	6	385.9
2013-11-22 MN1	WT	immediate	2	N	6	379.8
2013-11-22 MN1	WT	immediate	2	N	5	342.8
2013-11-22 MN1	WT	immediate	2	N	4	314.9
2013-11-22 MN1	WT	immediate	3	N	3	105.7
2013-11-22 MN1	WT	immediate	3	N	3	98
2013-11-22 MN1	WT	immediate	3	N	3	39.2
2013-11-22 MN1	WT	immediate	3	N	4	176.2
2013-11-22 MN1	WT	immediate	3	N	5	64.6
2013-11-22 MN1	WT	immediate	3	N	8	229.9
2013-11-22 MN1	WT	immediate	3	N	8	285
2013-11-22 MN1	WT	immediate	3	N	8	282.2
2013-11-22 MN1	WT	immediate	3	N	8	341.8
2013-11-22 MN1	WT	immediate	3	N	7	195.7
2013-11-22 MN1	WT	immediate	3	N	8	221.2
2013-11-22 MN1	WT	immediate	3	N	9	217.6
2013-11-22 MN1	WT	immediate	3	N	9	192.4
2013-11-22 MN1	WT	immediate	4	N	2	191.3
2013-11-22 MN1	WT	immediate	4	N	2	341.8
2013-11-22 MN1	WT	immediate	5	N	2	303.7
2013-11-22 MN1	WT	immediate	5	N	2	317.9
2013-11-22 MN1	WT	immediate	6	N	1	178
2013-11-22 MN1	WT	immediate	7	N	1	102.3
2013-11-22 MN1	WT	immediate	8	N	5	236.8
2013-11-22 MN1	WT	immediate	8	N	6	314
2013-11-22 MN1	WT	immediate	8	N	6	198.7
2013-11-22 MN1	WT	immediate	8	N	6	327.4
2013-11-22 MN1	WT	immediate	8	N	6	348.9
2013-11-22 MN1	WT	immediate	8	N	5	372.2
2013-11-22 MN1	WT	immediate	8	N	3	261.9
2013-11-22 MN1	WT	immediate	8	N	5	232.4
2013-11-22 MN1	WT	immediate	8	N	6	296.3
2013-11-22 MN1	WT	immediate	8	N	6	283.7
2013-11-22 MN1	WT	immediate	8	N	5	131.3
2013-11-22 MN1	WT	immediate	8	N	5	251.6
[truncated: 45 more rows]

## Sheet: Nodes+total dendritic length
This table displays source data used for Table 2 (branching points and total dendritic length) and figure 8A (branching points vs total dendritic length)
Table 2 Soma area / Primary dendrites / Total dendritic length / Dendritic paths / Terminal segments length
mutation	type	Nodes	Length(µm)
WT	delayed	35	9329.3
WT	delayed	27	6055
WT	delayed	43	8266.2
WT	delayed	60	11225.3
WT	delayed	26	2331.7
WT	delayed	33	3870.8
WT	delayed	41	7289.6
WT	delayed	65	9555.2
WT	delayed	44	9887.5
WT	delayed	32	6981.3
WT	delayed	38	7423.6
WT	delayed	72	14041.6
WT	delayed	49	10972.7
WT	delayed	52	9969.4
mutation	type	Nodes	Length(µm)
WT	immediate	18	4182.1
WT	immediate	31	5782
WT	immediate	46	7932.8
WT	immediate	19	6211.6
WT	immediate	14	3029.7
WT	immediate	13	4269.5
WT	immediate	52	7457.2
WT	immediate	29	4741.2
WT	immediate	19	4345.7
WT	immediate	25	5404
mutation	type	Nodes	Length(µm)
SOD	delayed	58	11053
SOD	delayed	57	13857
SOD	delayed	52	13196
SOD	delayed	35	7020
SOD	delayed	49	8700
SOD	delayed	38	5004
SOD	delayed	27	4335.4
SOD	delayed	22	6069.7
SOD	delayed	23	3794.9
SOD	delayed	76	11101.2
SOD	delayed	27	7604.1
SOD	delayed	16	4521.3
SOD	delayed	51	9930.5
SOD	delayed	72	16556.3
mutation	type	Nodes	Length(µm)
SOD	immediate	23	3551
SOD	immediate	45	4121.6
SOD	immediate	40	3596.7
SOD	immediate	9	3336.1
SOD	immediate	16	3370.4

## Sheet: Terminal segment length
This table displays source data (terminal segment length) used for Table 2
name	mutation	type	Length(µm)
2012-03-28 MN2	WT	immediate	105.6
2012-03-28 MN2	WT	immediate	110.7
2012-03-28 MN2	WT	immediate	70.7
2012-03-28 MN2	WT	immediate	112.6
2012-03-28 MN2	WT	immediate	92.8
2012-03-28 MN2	WT	immediate	92.5
2012-03-28 MN2	WT	immediate	21.6
2012-03-28 MN2	WT	immediate	230.2
2012-03-28 MN2	WT	immediate	11.1
2012-03-28 MN2	WT	immediate	76.9
2012-03-28 MN2	WT	immediate	117.1
2012-03-28 MN2	WT	immediate	34.2
2012-03-28 MN2	WT	immediate	73.9
2012-03-28 MN2	WT	immediate	219.1
2012-03-28 MN2	WT	immediate	24.4
2012-03-28 MN2	WT	immediate	153.7
2012-03-28 MN2	WT	immediate	145.1
2012-03-28 MN2	WT	immediate	36.9
2012-03-28 MN2	WT	immediate	200.7
2012-03-28 MN2	WT	immediate	22.1
2012-03-28 MN2	WT	immediate	102.7
2012-03-28 MN2	WT	immediate	76.8
2012-03-28 MN2	WT	immediate	40.1
2012-03-28 MN2	WT	immediate	90
2012-03-28 MN2	WT	immediate	113.2
2012-03-28 MN2	WT	immediate	10.7
2012-03-28 MN2	WT	immediate	67.3
2012-03-28 MN2	WT	immediate	252
2012-03-28 MN2	WT	immediate	31.7
2012-03-28 MN2	WT	immediate	145.4
2012-03-28 MN2	WT	immediate	57.2
2012-03-28 MN2	WT	immediate	47.1
2012-03-28 MN2	WT	immediate	101.8
2012-03-28 MN2	WT	immediate	43.8
2012-03-28 MN2	WT	immediate	57.5
2012-03-28 MN2	WT	immediate	89.3
2012-03-28 MN2	WT	immediate	200.3
2012-03-28 MN2	WT	immediate	216.6
2012-03-28 MN2	WT	immediate	70.6
2012-03-28 MN2	WT	immediate	39.7
2012-03-28 MN2	WT	immediate	115.3
2012-03-28 MN2	WT	immediate	61.7
2012-03-28 MN2	WT	immediate	65.5
2012-03-28 MN2	WT	immediate	125.8
2012-03-28 MN2	WT	immediate	8.2
2012-04-04 MN3	WT	delayed	105.4
2012-04-04 MN3	WT	delayed	116.9
2012-04-04 MN3	WT	delayed	346
2012-04-04 MN3	WT	delayed	20.2
2012-04-04 MN3	WT	delayed	36.5
2012-04-04 MN3	WT	delayed	27.4
2012-04-04 MN3	WT	delayed	52.2
2012-04-04 MN3	WT	delayed	457
2012-04-04 MN3	WT	delayed	73.7
2012-04-04 MN3	WT	delayed	21.4
2012-04-04 MN3	WT	delayed	132.9
2012-04-04 MN3	WT	delayed	81.8
2012-04-04 MN3	WT	delayed	153.9
2012-04-04 MN3	WT	delayed	46.8
2012-04-04 MN3	WT	delayed	46.8
2012-04-04 MN3	WT	delayed	30.2
2012-04-04 MN3	WT	delayed	69.5
2012-04-04 MN3	WT	delayed	233.5
2012-04-04 MN3	WT	delayed	209.6
2012-04-04 MN3	WT	delayed	58.5
2012-04-04 MN3	WT	delayed	8.4
2012-04-04 MN3	WT	delayed	188.6
2012-04-04 MN3	WT	delayed	1
2012-04-04 MN3	WT	delayed	320
2012-04-04 MN3	WT	delayed	15.9
2012-04-04 MN3	WT	delayed	191.6
2012-04-04 MN3	WT	delayed	41.6
2012-04-04 MN3	WT	delayed	181.9
2012-04-04 MN3	WT	delayed	69.4
2012-04-04 MN3	WT	delayed	40.4
2012-04-04 MN3	WT	delayed	250.1
2012-04-04 MN3	WT	delayed	119.1
2012-04-04 MN3	WT	delayed	42.6
2012-04-04 MN3	WT	delayed	137.2
2012-04-04 MN3	WT	delayed	90.4
2012-04-04 MN3	WT	delayed	157
2012-04-04 MN3	WT	delayed	3.2
2012-04-04 MN3	WT	delayed	16.2
2012-04-04 MN3	WT	delayed	151.4
2012-04-04 MN3	WT	delayed	60.6
2012-04-04 MN3	WT	delayed	56.9
2012-04-04 MN3	WT	delayed	154.8
2012-04-04 MN3	WT	delayed	170.5
2012-04-04 MN3	WT	delayed	8.1
2012-04-04 MN3	WT	delayed	12.2
2012-04-04 MN3	WT	delayed	83.7
2012-04-04 MN3	WT	delayed	53.6
2012-04-04 MN3	WT	delayed	147.9
2012-04-04 MN3	WT	delayed	35.8
2012-04-04 MN3	WT	delayed	35.1
2012-04-04 MN3	WT	delayed	6.4
2012-04-04 MN3	WT	delayed	7.5
2012-04-04 MN3	WT	delayed	11.9
2012-04-04 MN3	WT	delayed	114.2
2012-04-04 MN3	WT	delayed	407.5
2012-04-04 MN3	WT	delayed	58.5
2012-04-04 MN3	WT	delayed	11
2012-04-04 MN3	WT	delayed	115.8
2012-04-04 MN3	WT	delayed	143.5
2012-04-04 MN3	WT	delayed	113.6
2012-04-04 MN3	WT	delayed	12.2
2012-04-04 MN3	WT	delayed	19.2
2012-04-04 MN3	WT	delayed	8.5
2012-04-04 MN9	WT	delayed	105.5
2012-04-04 MN9	WT	delayed	47.1
2012-04-04 MN9	WT	delayed	49.6
2012-04-04 MN9	WT	delayed	35.6
2012-04-04 MN9	WT	delayed	131.1
2012-04-04 MN9	WT	delayed	28.4
2012-04-04 MN9	WT	delayed	205
2012-04-04 MN9	WT	delayed	15.7
2012-04-04 MN9	WT	delayed	27.6
2012-04-04 MN9	WT	delayed	164.3
2012-04-04 MN9	WT	delayed	81.8
2012-04-04 MN9	WT	delayed	145.9
2012-04-04 MN9	WT	delayed	144.9
2012-04-04 MN9	WT	delayed	28.1
2012-04-04 MN9	WT	delayed	38.6
2012-04-04 MN9	WT	delayed	60.1
2012-04-04 MN9	WT	delayed	142.1
2012-04-04 MN9	WT	delayed	26.2
2012-04-04 MN9	WT	delayed	159.2
2012-04-04 MN9	WT	delayed	167.4
2012-04-04 MN9	WT	delayed	98.3
2012-04-04 MN9	WT	delayed	251.7
2012-04-04 MN9	WT	delayed	73.7
2012-04-04 MN9	WT	delayed	19.1
2012-04-04 MN9	WT	delayed	36.1
2012-04-04 MN9	WT	delayed	126.1
2012-04-04 MN9	WT	delayed	22.7
2012-04-04 MN9	WT	delayed	57.5
2012-04-04 MN9	WT	delayed	143.1
2012-04-04 MN9	WT	delayed	190.7
2012-04-04 MN9	WT	delayed	81.7
2012-04-04 MN9	WT	delayed	126.4
2012-04-04 MN9	WT	delayed	87.8
2012-04-04 MN9	WT	delayed	57.3
2012-04-04 MN9	WT	delayed	132.3
2012-04-04 MN9	WT	delayed	37.8
2012-04-04 MN9	WT	delayed	6
2012-04-04 MN9	WT	delayed	34
2012-04-04 MN9	WT	delayed	262.6
2012-04-04 MN9	WT	delayed	21.6
2012-04-04 MN9	WT	delayed	98
2012-04-04 MN9	WT	delayed	87.1
2012-04-04 MN9	WT	delayed	77.2
2012-04-04 MN9	WT	delayed	31.8
2012-04-04 MN9	WT	delayed	37.3
2012-04-04 MN9	WT	delayed	38.8
2012-04-04 MN9	WT	delayed	47.1
2012-04-04 MN9	WT	delayed	37
2012-04-04 MN9	WT	delayed	45.9
2012-04-04 MN9	WT	delayed	136.6
2012-04-04 MN9	WT	delayed	42.7
2012-04-04 MN9	WT	delayed	77.9
2012-04-04 MN9	WT	delayed	11
2012-04-04 MN9	WT	delayed	55.5
2012-04-04 MN9	WT	delayed	58
2012-04-04 MN9	WT	delayed	32.7
2012-04-04 MN9	WT	delayed	101.6
2012-04-04 MN9	WT	delayed	22.7
2012-04-04 MN9	WT	delayed	64.5
2012-04-04 MN9	WT	delayed	127.3
2012-04-04 MN9	WT	delayed	43.6
2012-04-04 MN9	WT	delayed	102.5
2012-04-04 MN9	WT	delayed	40.5
2012-04-04 MN9	WT	delayed	43.4
2012-04-04 MN9	WT	delayed	187.4
2012-04-04 MN9	WT	delayed	182.2
2012-04-04 MN9	WT	delayed	118.6
2012-04-04 MN9	WT	delayed	248.8
2012-04-04 MN9	WT	delayed	112.6
2012-04-04 MN9	WT	delayed	94.7
2012-04-04 MN9	WT	delayed	149.2
2012-04-04 MN9	WT	delayed	52.1
2012-04-04 MN9	WT	delayed	80
2012-04-04 MN9	WT	delayed	285.6
2012-04-04 MN9	WT	delayed	303.9
2012-04-04 MN9	WT	delayed	261.2
2012-04-04 MN9	WT	delayed	17.2
2012-04-04 MN9	WT	delayed	76.5
2012-04-04 MN9	WT	delayed	102.2
2012-04-04 MN9	WT	delayed	67.8
2012-04-04 MN9	WT	delayed	51.6
2012-04-04 MN9	WT	delayed	57.5
2012-04-04 MN9	WT	delayed	36
2012-04-04 MN9	WT	delayed	51.7
2012-04-04 MN9	WT	delayed	23.8
2012-04-04 MN9	WT	delayed	66.7
2012-04-04 MN9	WT	delayed	116.4
2012-04-04 MN9	WT	delayed	28.3
2012-04-04 MN9	WT	delayed	23.6
2012-04-04 MN9	WT	delayed	35.7
2012-04-04 MN9	WT	delayed	263.2
2012-04-04 MN9	WT	delayed	82.3
2012-04-04 MN9	WT	delayed	103.8
2012-04-04 MN9	WT	delayed	49.3
2012-04-04 MN9	WT	delayed	125.6
2012-04-04 MN9	WT	delayed	8.7
2012-04-04 MN9	WT	delayed	32.9
2012-04-04 MN9	WT	delayed	118.4
2012-04-04 MN9	WT	delayed	267.3
2012-04-04 MN9	WT	delayed	3.3
2012-04-04 MN9	WT	delayed	39.8
2012-04-04 MN9	WT	delayed	11.5
2012-04-04 MN9	WT	delayed	23.7
2012-04-04 MN9	WT	delayed	7.7
2012-04-06 MN4	WT	delayed	51.8
2012-04-06 MN4	WT	delayed	86.2
2012-04-06 MN4	WT	delayed	41.5
2012-04-06 MN4	WT	delayed	26.3
2012-04-06 MN4	WT	delayed	146.3
2012-04-06 MN4	WT	delayed	81
2012-04-06 MN4	WT	delayed	73.8
2012-04-06 MN4	WT	delayed	385.7
2012-04-06 MN4	WT	delayed	208.6
2012-04-06 MN4	WT	delayed	242.1
2012-04-06 MN4	WT	delayed	42.7
2012-04-06 MN4	WT	delayed	12.7
2012-04-06 MN4	WT	delayed	75.3
2012-04-06 MN4	WT	delayed	16.5
2012-04-06 MN4	WT	delayed	11.2
2012-04-06 MN4	WT	delayed	12.5
2012-04-06 MN4	WT	delayed	390.5
2012-04-06 MN4	WT	delayed	50.6
2012-04-06 MN4	WT	delayed	53.7
2012-04-06 MN4	WT	delayed	6.3
2012-04-06 MN4	WT	delayed	181.2
2012-04-06 MN4	WT	delayed	161.9
2012-04-06 MN4	WT	delayed	110.7
2012-04-06 MN4	WT	delayed	50.2
2012-04-06 MN4	WT	delayed	44.8
2012-04-06 MN4	WT	delayed	103
2012-04-06 MN4	WT	delayed	179.9
2012-04-06 MN4	WT	delayed	276.5
2012-04-06 MN4	WT	delayed	59.8
2012-04-06 MN4	WT	delayed	198.9
2012-04-06 MN4	WT	delayed	102.3
2012-04-06 MN4	WT	delayed	65.7
2012-04-06 MN4	WT	delayed	35.6
2012-04-06 MN4	WT	delayed	62.2
2012-04-06 MN4	WT	delayed	81.9
2012-04-06 MN4	WT	delayed	134.6
2012-04-06 MN4	WT	delayed	10.9
2012-04-06 MN4	WT	delayed	77.5
2012-04-06 MN4	WT	delayed	201.2
2012-04-06 MN4	WT	delayed	185.2
2012-04-06 MN4	WT	delayed	62.9
2012-04-06 MN4	WT	delayed	33.7
2012-04-06 MN4	WT	delayed	26.4
2012-04-06 MN4	WT	delayed	5.7
2012-04-06 MN4	WT	delayed	38.7
2012-04-06 MN4	WT	delayed	9.1
2012-04-06 MN4	WT	delayed	39.3
2012-04-06 MN4	WT	delayed	103.5
2012-04-06 MN4	WT	delayed	70.2
2012-04-06 MN4	WT	delayed	19.3
2012-04-06 MN4	WT	delayed	18.2
2012-04-06 MN4	WT	delayed	19.5
2012-04-06 MN4	WT	delayed	204
2012-04-06 MN4	WT	delayed	105.8
2012-04-06 MN4	WT	delayed	70.2
2012-04-06 MN4	WT	delayed	40.6
2012-04-06 MN4	WT	delayed	50.1
2012-04-06 MN4	WT	delayed	21.5
2012-04-06 MN4	WT	delayed	246.3
2012-04-06 MN4	WT	delayed	103.9
2012-04-06 MN4	WT	delayed	12.2
2012-04-06 MN4	WT	delayed	129.3
2012-04-06 MN4	WT	delayed	233.2
2012-04-06 MN4	WT	delayed	71.1
2012-04-06 MN4	WT	delayed	45.7
2012-04-06 MN4	WT	delayed	44.3
2012-04-06 MN4	WT	delayed	165.3
2012-04-06 MN4	WT	delayed	21.8
2012-04-06 MN4	WT	delayed	25.8
2012-04-06 MN4	WT	delayed	289.8
2012-04-06 MN4	WT	delayed	36.4
2012-04-06 MN4	WT	delayed	26.7
2012-04-06 MN4	WT	delayed	15.1
2012-04-06 MN4	WT	delayed	4.2
2012-04-06 MN4	WT	delayed	141.9
2012-04-06 MN4	WT	delayed	33.6
2012-04-06 MN4	WT	delayed	39.9
2012-04-06 MN4	WT	delayed	180.6
2012-04-06 MN4	WT	delayed	170
2012-04-06 MN4	WT	delayed	34.2
2012-04-06 MN4	WT	delayed	178.1
2012-04-06 MN4	WT	delayed	95.8
2012-04-06 MN4	WT	delayed	113.4
2012-04-06 MN4	WT	delayed	11.2
2012-04-06 MN4	WT	delayed	24.2
2012-04-06 MN4	WT	delayed	10.3
2012-04-06 MN4	WT	delayed	117.2
2012-04-06 MN4	WT	delayed	10.8
2012-04-06 MN4	WT	delayed	83.5
2012-04-06 MN4	WT	delayed	148.6
2012-04-06 MN4	WT	delayed	77.8
2012-04-06 MN4	WT	delayed	50
2012-04-06 MN4	WT	delayed	63.7
2012-04-06 MN4	WT	delayed	116.7
2012-04-06 MN4	WT	delayed	136
2012-04-06 MN4	WT	delayed	101.2
2012-04-06 MN4	WT	delayed	217
2012-04-06 MN4	WT	delayed	28.4
2012-04-06 MN4	WT	delayed	23.9
2012-04-06 MN4	WT	delayed	39.6
2012-04-06 MN4	WT	delayed	284.8
2012-04-06 MN4	WT	delayed	30.4
2012-04-06 MN4	WT	delayed	36
2012-04-06 MN4	WT	delayed	149.8
2012-04-06 MN4	WT	delayed	152.7
2012-04-06 MN4	WT	delayed	13.5
2012-04-06 MN4	WT	delayed	52
2012-04-06 MN4	WT	delayed	22
2012-04-06 MN4	WT	delayed	41.6
2012-04-06 MN4	WT	delayed	44.1
2012-04-06 MN4	WT	delayed	16.9
2012-04-06 MN4	WT	delayed	39.7
2012-04-06 MN4	WT	delayed	67.3
2012-04-06 MN4	WT	delayed	139.2
2012-04-06 MN4	WT	delayed	89.7
2012-04-06 MN4	WT	delayed	354.1
2012-04-06 MN4	WT	delayed	251.3
2012-04-06 MN4	WT	delayed	157.5
2012-04-06 MN4	WT	delayed	135.7
2012-04-06 MN4	WT	delayed	97
2012-04-06 MN4	WT	delayed	25.7
2012-04-06 MN4	WT	delayed	19.8
2012-04-06 MN4	WT	delayed	8.2
2012-04-06 MN4	WT	delayed	61.3
2012-04-06 MN4	WT	delayed	23.1
2012-04-06 MN4	WT	delayed	363.9
2012-04-06 MN4	WT	delayed	5.7
2012-08-28 MN2	WT	immediate	182.8
2012-08-28 MN2	WT	immediate	233.9
2012-08-28 MN2	WT	immediate	212.8
2012-08-28 MN2	WT	immediate	24.8
2012-08-28 MN2	WT	immediate	4.6
2012-08-28 MN2	WT	immediate	261.2
2012-08-28 MN2	WT	immediate	18.1
2012-08-28 MN2	WT	immediate	65.9
2012-08-28 MN2	WT	immediate	27.6
2012-08-28 MN2	WT	immediate	100
2012-08-28 MN2	WT	immediate	207.5
2012-08-28 MN2	WT	immediate	290.8
2012-08-28 MN2	WT	immediate	57.3
2012-08-28 MN2	WT	immediate	54.7
2012-08-28 MN2	WT	immediate	79.8
2012-08-28 MN2	WT	immediate	42
2012-08-28 MN2	WT	immediate	108.1
2012-08-28 MN2	WT	immediate	163
2012-08-28 MN2	WT	immediate	41.4
2012-08-28 MN2	WT	immediate	9.9
2012-08-28 MN2	WT	immediate	6.1
2012-08-28 MN2	WT	immediate	52.3
2012-08-28 MN2	WT	immediate	241.2
2012-08-28 MN2	WT	immediate	117.6
2012-08-28 MN2	WT	immediate	192.8
2012-08-28 MN2	WT	immediate	77.4
2012-08-28 MN2	WT	immediate	132.4
2012-08-28 MN2	WT	immediate	44.1
2012-08-28 MN2	WT	immediate	48.3
2012-08-28 MN2	WT	immediate	192.7
2012-08-28 MN2	WT	immediate	50.4
2012-08-28 MN2	WT	immediate	130.6
2012-08-28 MN2	WT	immediate	29.3
2012-08-28 MN2	WT	immediate	6
2012-08-28 MN2	WT	immediate	9.3
2012-08-28 MN4	WT	immediate	29.8
2012-08-28 MN4	WT	immediate	186.4
2012-08-28 MN4	WT	immediate	23.7
2012-08-28 MN4	WT	immediate	336
2012-08-28 MN4	WT	immediate	36.4
2012-08-28 MN4	WT	immediate	512.3
2012-08-28 MN4	WT	immediate	152.2
2012-08-28 MN4	WT	immediate	184.4
2012-08-28 MN4	WT	immediate	142.8
2012-08-28 MN4	WT	immediate	208.3
2012-08-28 MN4	WT	immediate	95.4
2012-08-28 MN4	WT	immediate	40.1
2012-08-28 MN4	WT	immediate	270.9
2012-08-28 MN4	WT	immediate	261.1
2012-08-28 MN4	WT	immediate	67.2
2012-08-28 MN4	WT	immediate	0.8
2012-08-28 MN4	WT	immediate	5.6
2012-08-28 MN4	WT	immediate	59.6
2012-08-28 MN4	WT	immediate	356.7
2012-08-28 MN4	WT	immediate	338.6
2012-08-28 MN4	WT	immediate	198.3
2012-08-28 MN4	WT	immediate	360.6
2012-08-28 MN4	WT	immediate	73.9
2012-08-28 MN4	WT	immediate	255.7
2012-08-28 MN4	WT	immediate	35.4
2012-08-28 MN4	WT	immediate	20.5
2012-08-28 MN4	WT	immediate	179.5
2012-08-28 MN4	WT	immediate	62.1
2012-08-28 MN4	WT	immediate	195.8
2012-09-04 MN2	SOD	immediate	442.2
2012-09-04 MN2	SOD	immediate	5.1
2012-09-04 MN2	SOD	immediate	9.8
2012-09-04 MN2	SOD	immediate	420.3
2012-09-04 MN2	SOD	immediate	23.9
2012-09-04 MN2	SOD	immediate	11.3
2012-09-04 MN2	SOD	immediate	13.9
2012-09-04 MN2	SOD	immediate	110.4
2012-09-04 MN2	SOD	immediate	3.1
2012-09-04 MN2	SOD	immediate	63.8
2012-09-04 MN2	SOD	immediate	78
2012-09-04 MN2	SOD	immediate	18
2012-09-04 MN2	SOD	immediate	12.6
2012-09-04 MN2	SOD	immediate	29.4
2012-09-04 MN2	SOD	immediate	81.8
2012-09-04 MN2	SOD	immediate	24
2012-09-04 MN2	SOD	immediate	259.9
2012-09-04 MN2	SOD	immediate	3.4
2012-09-04 MN2	SOD	immediate	245.1
2012-09-04 MN2	SOD	immediate	498
2012-09-04 MN2	SOD	immediate	81.4
2012-09-04 MN2	SOD	immediate	195.7
2012-09-04 MN2	SOD	immediate	54.7
2012-09-04 MN2	SOD	immediate	317.2
2012-09-04 MN2	SOD	immediate	198.7
2012-09-04 MN2	SOD	immediate	53
2012-09-04 MN2	SOD	immediate	9.9
2012-09-04 MN2	SOD	immediate	17.3
2012-09-04 MN2	SOD	immediate	141.9
2012-09-04 MN2	SOD	immediate	4
2012-09-04 MN2	SOD	immediate	16.1
2012-09-04 MN2	SOD	immediate	2.8
2012-09-04 MN2	SOD	immediate	1.6
2012-09-04 MN2	SOD	immediate	296.3
2012-09-04 MN4	SOD	immediate	8.5
2012-09-04 MN4	SOD	immediate	37.5
2012-09-04 MN4	SOD	immediate	148.7
2012-09-04 MN4	SOD	immediate	168.1
2012-09-04 MN4	SOD	immediate	19.6
2012-09-04 MN4	SOD	immediate	85.4
2012-09-04 MN4	SOD	immediate	69.3
2012-09-04 MN4	SOD	immediate	109.2
2012-09-04 MN4	SOD	immediate	23
2012-09-04 MN4	SOD	immediate	273.3
2012-09-04 MN4	SOD	immediate	300.9
2012-09-04 MN4	SOD	immediate	99.8
2012-09-04 MN4	SOD	immediate	82.1
2012-09-04 MN4	SOD	immediate	87.2
2012-09-04 MN4	SOD	immediate	32.5
2012-09-04 MN4	SOD	immediate	15.6
2012-09-04 MN4	SOD	immediate	24.9
2012-09-04 MN4	SOD	immediate	105.9
2012-09-04 MN4	SOD	immediate	30.2
2012-09-04 MN4	SOD	immediate	61.4
2012-09-04 MN4	SOD	immediate	4.5
2012-09-04 MN4	SOD	immediate	16.9
2012-09-04 MN4	SOD	immediate	512.5
2012-09-04 MN4	SOD	immediate	91.3
2012-09-04 MN4	SOD	immediate	0
2012-09-04 MN4	SOD	immediate	584.2
2012-09-04 MN4	SOD	immediate	264.8
2012-09-04 MN4	SOD	immediate	127.3
2012-09-04 MN4	SOD	immediate	266
2012-09-04 MN4	SOD	immediate	84.1
2012-09-04 MN4	SOD	immediate	81.5
2012-09-04 MN4	SOD	immediate	12.2
2012-09-04 MN4	SOD	immediate	241.5
2012-09-04 MN4	SOD	immediate	151.7
2012-09-04 MN4	SOD	immediate	30
2012-09-04 MN4	SOD	immediate	400.9
2012-09-04 MN4	SOD	immediate	73.6
2012-09-04 MN4	SOD	immediate	56.8
2012-09-04 MN4	SOD	immediate	18.3
2012-09-04 MN4	SOD	immediate	106.2
2012-09-04 MN4	SOD	immediate	21.5
2012-09-04 MN4	SOD	immediate	111.6
2012-09-04 MN4	SOD	immediate	40.5
2012-09-04 MN4	SOD	immediate	46.5
2012-09-04 MN4	SOD	immediate	196.3
2012-09-04 MN4	SOD	immediate	41.6
2012-09-04 MN4	SOD	immediate	87.3
2012-09-04 MN4	SOD	immediate	23.6
2012-09-04 MN4	SOD	immediate	43.2
2012-09-04 MN4	SOD	immediate	59.8
2012-09-04 MN4	SOD	immediate	6.3
2012-09-04 MN4	SOD	immediate	4.4
2012-09-04 MN4	SOD	immediate	479.8
2012-09-06 MN2	SOD	immediate	264.6
2012-09-06 MN2	SOD	immediate	33.2
2012-09-06 MN2	SOD	immediate	79.9
2012-09-06 MN2	SOD	immediate	170.3
2012-09-06 MN2	SOD	immediate	63
2012-09-06 MN2	SOD	immediate	138.1
2012-09-06 MN2	SOD	immediate	162.3
2012-09-06 MN2	SOD	immediate	124.8
2012-09-06 MN2	SOD	immediate	253.5
2012-09-06 MN2	SOD	immediate	103
2012-09-06 MN2	SOD	immediate	7.5
2012-09-06 MN2	SOD	immediate	142.2
2012-09-06 MN2	SOD	immediate	27.5
2012-09-06 MN2	SOD	immediate	470.6
2012-09-06 MN2	SOD	immediate	335.2
2012-09-06 MN2	SOD	immediate	41.9
2012-09-06 MN2	SOD	immediate	5.2
2012-09-06 MN2	SOD	immediate	249.6
2012-09-06 MN2	SOD	immediate	39.8
2012-09-06 MN2	SOD	immediate	182
2012-09-06 MN2	SOD	immediate	234.2
2012-09-06 MN2	SOD	immediate	207.7
2012-09-06 MN5	SOD	delayed	159.6
2012-09-06 MN5	SOD	delayed	132.6
2012-09-06 MN5	SOD	delayed	19.6
2012-09-06 MN5	SOD	delayed	34.8
2012-09-06 MN5	SOD	delayed	124.1
2012-09-06 MN5	SOD	delayed	21.7
2012-09-06 MN5	SOD	delayed	70.4
2012-09-06 MN5	SOD	delayed	56.3
2012-09-06 MN5	SOD	delayed	26.1
2012-09-06 MN5	SOD	delayed	86
2012-09-06 MN5	SOD	delayed	91.9
2012-09-06 MN5	SOD	delayed	2.1
2012-09-06 MN5	SOD	delayed	94.3
2012-09-06 MN5	SOD	delayed	63.3
2012-09-06 MN5	SOD	delayed	55.7
2012-09-06 MN5	SOD	delayed	110.6
2012-09-06 MN5	SOD	delayed	289.7
2012-09-06 MN5	SOD	delayed	22.3
2012-09-06 MN5	SOD	delayed	23.1
2012-09-06 MN5	SOD	delayed	53.9
2012-09-06 MN5	SOD	delayed	56.6
2012-09-06 MN5	SOD	delayed	74.9
2012-09-06 MN5	SOD	delayed	42.3
2012-09-06 MN5	SOD	delayed	6.4
2012-09-06 MN5	SOD	delayed	58
2012-09-06 MN5	SOD	delayed	104.8
2012-09-06 MN5	SOD	delayed	9.1
2012-09-06 MN5	SOD	delayed	46.6
2012-09-06 MN5	SOD	delayed	91
2012-09-06 MN5	SOD	delayed	41
2012-09-06 MN5	SOD	delayed	53.1
2012-09-06 MN5	SOD	delayed	59.4
2012-09-06 MN5	SOD	delayed	70.4
2012-09-06 MN5	SOD	delayed	102.5
2012-09-06 MN5	SOD	delayed	4.6
2012-09-06 MN5	SOD	delayed	158.8
2012-09-06 MN5	SOD	delayed	88.3
2012-09-06 MN5	SOD	delayed	260.6
2012-09-06 MN5	SOD	delayed	36.7
2012-09-06 MN5	SOD	delayed	90.9
2012-09-06 MN5	SOD	delayed	89.6
2012-09-06 MN5	SOD	delayed	198
2012-09-06 MN5	SOD	delayed	15.2
2012-09-06 MN5	SOD	delayed	119.7
2012-09-06 MN5	SOD	delayed	126.1
2012-09-06 MN5	SOD	delayed	113.4
2012-09-06 MN5	SOD	delayed	51.4
2012-09-06 MN5	SOD	delayed	174
2012-09-06 MN5	SOD	delayed	126.2
2012-09-06 MN5	SOD	delayed	25.6
2012-09-06 MN5	SOD	delayed	44.4
2012-09-06 MN5	SOD	delayed	193.8
2012-09-06 MN5	SOD	delayed	42.2
2012-09-06 MN5	SOD	delayed	35.4
2012-09-06 MN5	SOD	delayed	18.5
2012-09-06 MN5	SOD	delayed	13.6
2012-09-06 MN5	SOD	delayed	12.1
2012-09-06 MN5	SOD	delayed	54.1
2012-09-06 MN5	SOD	delayed	41.6
2012-09-06 MN5	SOD	delayed	17.4
2012-09-06 MN5	SOD	delayed	20.1
2012-09-06 MN5	SOD	delayed	12.5
2012-09-06 MN5	SOD	delayed	32.3
2012-09-06 MN5	SOD	delayed	0.7
2012-09-06 MN5	SOD	delayed	41.7
2012-09-06 MN5	SOD	delayed	36.1
2012-09-06 MN5	SOD	delayed	20.3
2012-09-06 MN5	SOD	delayed	31.4
2012-09-06 MN5	SOD	delayed	22.5
2012-09-06 MN5	SOD	delayed	4
2012-09-06 MN5	SOD	delayed	14.8
2012-09-06 MN5	SOD	delayed	28.1
2012-09-06 MN5	SOD	delayed	31.3
2012-09-06 MN5	SOD	delayed	56.1
2012-09-06 MN5	SOD	delayed	41
2012-09-06 MN5	SOD	delayed	13
2012-09-06 MN5	SOD	delayed	12.4
2012-09-06 MN5	SOD	delayed	43.8
2012-09-06 MN5	SOD	delayed	19.5
2012-09-06 MN5	SOD	delayed	124.8
2012-09-06 MN5	SOD	delayed	41.5
2012-09-06 MN5	SOD	delayed	52.9
2012-09-06 MN5	SOD	delayed	21.8
2012-09-06 MN5	SOD	delayed	112.4
2012-09-06 MN5	SOD	delayed	87
2012-09-06 MN5	SOD	delayed	126.6
2012-09-06 MN5	SOD	delayed	7.8
2012-09-06 MN5	SOD	delayed	143.4
2012-09-06 MN5	SOD	delayed	30.4
2012-09-06 MN5	SOD	delayed	156
2012-09-06 MN5	SOD	delayed	93.2
2012-09-06 MN5	SOD	delayed	49.5
2012-09-06 MN5	SOD	delayed	8.6
2012-09-06 MN5	SOD	delayed	72.4
2012-09-06 MN5	SOD	delayed	46.4
2012-09-06 MN5	SOD	delayed	37.5
2012-09-06 MN5	SOD	delayed	4.5
2012-09-06 MN5	SOD	delayed	31.6
2012-09-06 MN5	SOD	delayed	32.5
2012-09-06 MN5	SOD	delayed	32.9
2012-09-06 MN5	SOD	delayed	14.8
2012-09-06 MN5	SOD	delayed	86.5
2012-09-06 MN5	SOD	delayed	71.8
2012-09-06 MN5	SOD	delayed	97.5
2012-09-06 MN5	SOD	delayed	132.2
2012-09-06 MN5	SOD	delayed	9.9
2012-09-06 MN5	SOD	delayed	90.9
2012-09-06 MN5	SOD	delayed	28.6
2012-09-06 MN5	SOD	delayed	31.9
2012-09-06 MN5	SOD	delayed	124.7
2012-09-06 MN5	SOD	delayed	59
2012-09-06 MN5	SOD	delayed	81.5
2012-09-06 MN5	SOD	delayed	19.9
2012-09-06 MN5	SOD	delayed	38.8
2012-09-06 MN5	SOD	delayed	87.7
2012-09-06 MN5	SOD	delayed	100.5
2012-09-06 MN5	SOD	delayed	15
2012-09-06 MN5	SOD	delayed	16
2012-09-06 MN5	SOD	delayed	192.6
2012-09-06 MN5	SOD	delayed	102.9
2012-09-06 MN5	SOD	delayed	107.4
2012-09-06 MN5	SOD	delayed	35.3
2012-09-06 MN5	SOD	delayed	23.1
2012-09-06 MN5	SOD	delayed	94.1
2012-09-06 MN5	SOD	delayed	102.3
2012-09-06 MN5	SOD	delayed	7.6
2012-09-06 MN5	SOD	delayed	63.4
2012-09-06 MN5	SOD	delayed	76.9
2012-09-06 MN5	SOD	delayed	37.6
2012-09-06 MN5	SOD	delayed	18.4
2012-09-06 MN5	SOD	delayed	5.4
2012-09-06 MN5	SOD	delayed	19
2012-09-06 MN5	SOD	delayed	22.8
2012-09-06 MN5	SOD	delayed	6.8
2012-09-06 MN5	SOD	delayed	34.4
2012-09-06 MN5	SOD	delayed	68.4
2012-09-06 MN5	SOD	delayed	18
2012-09-06 MN5	SOD	delayed	11.9
2012-09-06 MN5	SOD	delayed	13.4
2012-09-06 MN5	SOD	delayed	155.5
2012-09-06 MN5	SOD	delayed	125.4
2012-09-06 MN5	SOD	delayed	40.7
2012-09-06 MN5	SOD	delayed	71
2012-09-06 MN5	SOD	delayed	14.9
2012-09-06 MN5	SOD	delayed	38.9
2012-09-06 MN5	SOD	delayed	16.8
2012-09-06 MN5	SOD	delayed	47.6
2012-09-06 MN5	SOD	delayed	32.6
2012-09-06 MN5	SOD	delayed	48.8
2012-09-06 MN5	SOD	delayed	190
2012-09-06 MN5	SOD	delayed	67
2012-09-06 MN5	SOD	delayed	81.4
2012-09-06 MN5	SOD	delayed	12.5
2012-09-06 MN5	SOD	delayed	59
2012-09-06 MN5	SOD	delayed	109.6
2012-09-06 MN5	SOD	delayed	109.8
2012-09-06 MN5	SOD	delayed	15.6
2012-09-06 MN5	SOD	delayed	20.6
2012-09-06 MN5	SOD	delayed	212.9
2012-09-06 MN5	SOD	delayed	209.2
2012-09-06 MN5	SOD	delayed	31.1
2012-09-06 MN5	SOD	delayed	12.7
2012-09-06 MN5	SOD	delayed	87.2
2012-09-06 MN5	SOD	delayed	32.5
2012-09-06 MN5	SOD	delayed	46.9
2012-09-06 MN5	SOD	delayed	87.1
2012-09-06 MN5	SOD	delayed	66.2
2012-09-06 MN5	SOD	delayed	58.2
2012-09-06 MN5	SOD	delayed	65.3
2012-09-06 MN5	SOD	delayed	120.4
2012-09-06 MN5	SOD	delayed	27.1
2012-09-06 MN5	SOD	delayed	102.4
2012-09-06 MN5	SOD	delayed	43.2
2012-09-06 MN5	SOD	delayed	20
2012-09-06 MN5	SOD	delayed	168.8
2012-09-06 MN5	SOD	delayed	137.4
2012-09-06 MN5	SOD	delayed	63.7
2012-09-06 MN5	SOD	delayed	76.8
2012-09-06 MN5	SOD	delayed	110.8
2012-09-06 MN5	SOD	delayed	144.2
2012-09-06 MN5	SOD	delayed	46.9
2012-09-06 MN5	SOD	delayed	25.3
2012-09-06 MN5	SOD	delayed	100.1
2012-09-06 MN5	SOD	delayed	20
2012-09-06 MN5	SOD	delayed	24.9
2012-09-06 MN5	SOD	delayed	9.5
2012-09-06 MN5	SOD	delayed	157.4
2012-09-06 MN5	SOD	delayed	80.4
2012-09-06 MN5	SOD	delayed	25
2012-09-06 MN5	SOD	delayed	42
2012-09-06 MN5	SOD	delayed	140.1
2012-09-06 MN5	SOD	delayed	34.3
2012-09-06 MN5	SOD	delayed	174.4
2012-09-13 MN1	WT	immediate	278.6
2012-09-13 MN1	WT	immediate	221.2
2012-09-13 MN1	WT	immediate	275.6
2012-09-13 MN1	WT	immediate	17.3
2012-09-13 MN1	WT	immediate	56
2012-09-13 MN1	WT	immediate	17.7
2012-09-13 MN1	WT	immediate	52.4
2012-09-13 MN1	WT	immediate	4.2
2012-09-13 MN1	WT	immediate	4.7
2012-09-13 MN1	WT	immediate	84.3
2012-09-13 MN1	WT	immediate	149
2012-09-13 MN1	WT	immediate	169
2012-09-13 MN1	WT	immediate	9.4
2012-09-13 MN1	WT	immediate	57.3
2012-09-13 MN1	WT	immediate	72.3
2012-09-13 MN1	WT	immediate	89.3
2012-09-13 MN1	WT	immediate	18.3
2012-09-13 MN1	WT	immediate	120.4
2012-09-13 MN1	WT	immediate	204.8
2012-09-13 MN1	WT	immediate	135.5
2012-09-13 MN1	WT	immediate	35
2012-09-13 MN1	WT	immediate	42.1
2012-09-13 MN1	WT	immediate	47.7
2012-09-13 MN1	WT	immediate	148
2012-09-13 MN1	WT	immediate	190.7
2012-09-13 MN1	WT	immediate	73.2
2012-09-13 MN1	WT	immediate	123.2
2012-09-13 MN1	WT	immediate	279
2012-09-13 MN1	WT	immediate	73
2012-09-13 MN1	WT	immediate	63.3
2012-09-13 MN1	WT	immediate	19.1
2012-09-13 MN1	WT	immediate	15.5
2012-09-13 MN1	WT	immediate	319.4
2012-09-13 MN1	WT	immediate	14.9
2012-09-13 MN1	WT	immediate	93.4
2012-09-13 MN1	WT	immediate	19.5
2012-09-13 MN1	WT	immediate	20.6
2012-09-13 MN1	WT	immediate	60.7
2012-09-13 MN1	WT	immediate	74.7
2012-09-13 MN1	WT	immediate	28.1
2012-09-13 MN1	WT	immediate	218.6
2012-09-13 MN1	WT	immediate	116.5
2012-09-13 MN1	WT	immediate	77.1
2012-09-13 MN1	WT	immediate	48.4
2012-09-13 MN1	WT	immediate	30.6
2012-09-13 MN1	WT	immediate	274.4
2012-09-13 MN1	WT	immediate	24
2012-09-13 MN1	WT	immediate	9
2012-09-13 MN1	WT	immediate	285
2012-09-13 MN1	WT	immediate	73.7
2012-09-13 MN1	WT	immediate	13.9
2012-09-13 MN1	WT	immediate	35.5
2012-09-13 MN1	WT	immediate	186.2
2012-09-13 MN1	WT	immediate	17.1
2012-09-13 MN1	WT	immediate	60.3
2012-09-13 MN1	WT	immediate	57.8
2012-09-13 MN1	WT	immediate	16.2
2012-09-13 MN1	WT	immediate	153.7
2012-09-13 MN1	WT	immediate	168.2
2012-09-13 MN1	WT	immediate	119.6
2012-09-13 MN1	WT	immediate	105.8
2012-09-13 MN2	WT	delayed	71.7
2012-09-13 MN2	WT	delayed	96.5
2012-09-13 MN2	WT	delayed	168.8
2012-09-13 MN2	WT	delayed	145.4
2012-09-13 MN2	WT	delayed	165.7
2012-09-13 MN2	WT	delayed	75.7
2012-09-13 MN2	WT	delayed	102.3
2012-09-13 MN2	WT	delayed	68.4
2012-09-13 MN2	WT	delayed	329.9
2012-09-13 MN2	WT	delayed	13.3
2012-09-13 MN2	WT	delayed	53.8
2012-09-13 MN2	WT	delayed	46.7
2012-09-13 MN2	WT	delayed	30
2012-09-13 MN2	WT	delayed	4.6
2012-09-13 MN2	WT	delayed	19
2012-09-13 MN2	WT	delayed	20.8
2012-09-13 MN2	WT	delayed	30.5
2012-09-13 MN2	WT	delayed	56
2012-09-13 MN2	WT	delayed	20.6
2012-09-13 MN2	WT	delayed	57
2012-09-13 MN2	WT	delayed	16.5
2012-09-13 MN2	WT	delayed	26.6
2012-09-13 MN2	WT	delayed	136.6
2012-09-13 MN2	WT	delayed	61.1
2012-09-13 MN2	WT	delayed	60.2
2012-09-13 MN2	WT	delayed	39
2012-09-13 MN2	WT	delayed	61.6
2012-09-13 MN2	WT	delayed	272.5
2012-09-13 MN2	WT	delayed	25.3
2012-09-13 MN2	WT	delayed	391.4
2012-09-13 MN2	WT	delayed	64.4
2012-09-13 MN2	WT	delayed	66
2012-09-13 MN2	WT	delayed	40.9
2012-09-13 MN2	WT	delayed	38.9
2012-09-13 MN2	WT	delayed	7.9
2012-09-13 MN2	WT	delayed	15.6
2012-09-13 MN2	WT	delayed	145.9
2012-09-13 MN2	WT	delayed	25.6
2012-09-13 MN2	WT	delayed	24.9
2012-09-13 MN2	WT	delayed	34.7
2012-09-13 MN2	WT	delayed	33.9
2012-09-13 MN2	WT	delayed	47
2012-09-13 MN2	WT	delayed	256.2
2012-09-13 MN2	WT	delayed	181.1
2012-09-13 MN2	WT	delayed	155.8
2012-09-13 MN2	WT	delayed	14.8
2012-09-13 MN2	WT	delayed	92.3
2012-09-13 MN2	WT	delayed	89.7
2012-09-13 MN2	WT	delayed	153.1
2012-09-13 MN2	WT	delayed	134.2
2012-09-13 MN2	WT	delayed	90.2
2012-09-13 MN2	WT	delayed	110.4
2012-09-13 MN2	WT	delayed	83.1
2012-09-13 MN2	WT	delayed	162.4
2012-09-13 MN2	WT	delayed	28.4
2012-09-13 MN2	WT	delayed	57.4
2012-09-13 MN2	WT	delayed	92
2012-09-13 MN2	WT	delayed	55
2012-09-13 MN2	WT	delayed	47.8
2012-09-13 MN2	WT	delayed	58.1
2012-09-13 MN2	WT	delayed	55.6
2012-09-13 MN2	WT	delayed	6.6
2012-09-13 MN2	WT	delayed	146.8
2012-09-13 MN2	WT	delayed	56.7
2012-09-13 MN2	WT	delayed	121.6
2012-09-13 MN2	WT	delayed	121.3
2012-09-13 MN2	WT	delayed	213.8
2012-09-13 MN2	WT	delayed	67.3
2012-09-13 MN2	WT	delayed	31.5
2012-09-13 MN2	WT	delayed	78.3
2012-09-13 MN2	WT	delayed	60.7
2012-09-13 MN2	WT	delayed	62.8
2012-09-13 MN2	WT	delayed	123.5
2012-09-13 MN2	WT	delayed	71.1
2012-09-13 MN2	WT	delayed	118.7
2012-09-13 MN2	WT	delayed	237.1
2012-09-13 MN2	WT	delayed	58.1
2012-09-13 MN2	WT	delayed	57.7
2012-09-13 MN2	WT	delayed	23.2
2012-09-13 MN2	WT	delayed	37.2
2012-09-13 MN2	WT	delayed	115.2
2012-09-13 MN2	WT	delayed	84.1
2012-09-13 MN2	WT	delayed	210.6
2012-09-13 MN4	WT	immediate	61
2012-09-13 MN4	WT	immediate	152.7
2012-09-13 MN4	WT	immediate	243.2
2012-09-13 MN4	WT	immediate	30.1
2012-09-13 MN4	WT	immediate	52.2
2012-09-13 MN4	WT	immediate	47.6
2012-09-13 MN4	WT	immediate	33.6
2012-09-13 MN4	WT	immediate	7.2
2012-09-13 MN4	WT	immediate	24.4
2012-09-13 MN4	WT	immediate	401.6
2012-09-13 MN4	WT	immediate	8.2
2012-09-13 MN4	WT	immediate	98.7
2012-09-13 MN4	WT	immediate	185.1
2012-09-13 MN4	WT	immediate	26.5
2012-09-13 MN4	WT	immediate	195.5
2012-09-13 MN4	WT	immediate	94.9
2012-09-13 MN4	WT	immediate	16.5
2012-09-13 MN4	WT	immediate	55.4
2012-09-13 MN4	WT	immediate	100.1
2012-09-13 MN4	WT	immediate	59.6
2012-09-13 MN4	WT	immediate	63.5
2012-09-13 MN4	WT	immediate	55.2
2012-09-13 MN4	WT	immediate	114.7
2012-09-13 MN4	WT	immediate	116.9
2012-09-13 MN4	WT	immediate	285.7
2012-09-13 MN4	WT	immediate	60.1
2012-09-13 MN4	WT	immediate	26.1
2012-09-13 MN4	WT	immediate	11.2
2012-09-13 MN4	WT	immediate	25.7
2012-09-13 MN4	WT	immediate	288.2
2012-09-13 MN4	WT	immediate	268.5
2012-09-13 MN4	WT	immediate	64.8
2012-09-13 MN4	WT	immediate	23.2
2012-09-13 MN4	WT	immediate	25.1
2012-09-13 MN4	WT	immediate	239
2012-09-13 MN4	WT	immediate	187.4
2012-09-13 MN4	WT	immediate	157.6
2012-09-13 MN4	WT	immediate	55.6
2012-09-13 MN4	WT	immediate	171.7
2012-09-13 MN4	WT	immediate	42.6
2012-09-13 MN4	WT	immediate	31.6
2012-09-13 MN4	WT	immediate	113.9
2012-09-13 MN4	WT	immediate	21
2012-09-13 MN4	WT	immediate	18.8
2012-09-13 MN4	WT	immediate	20.2
2012-09-13 MN4	WT	immediate	189
2012-09-13 MN4	WT	immediate	77.1
2012-09-13 MN4	WT	immediate	274.8
2012-09-14 MN1	SOD	delayed	127.3
2012-09-14 MN1	SOD	delayed	92.6
2012-09-14 MN1	SOD	delayed	87
2012-09-14 MN1	SOD	delayed	77.3
2012-09-14 MN1	SOD	delayed	14.9
2012-09-14 MN1	SOD	delayed	21.5
2012-09-14 MN1	SOD	delayed	75.4
2012-09-14 MN1	SOD	delayed	20.6
2012-09-14 MN1	SOD	delayed	11.8
2012-09-14 MN1	SOD	delayed	116.5
2012-09-14 MN1	SOD	delayed	58.5
2012-09-14 MN1	SOD	delayed	240.9
2012-09-14 MN1	SOD	delayed	130.3
2012-09-14 MN1	SOD	delayed	14.4
2012-09-14 MN1	SOD	delayed	265.2
2012-09-14 MN1	SOD	delayed	2.5
2012-09-14 MN1	SOD	delayed	14.8
2012-09-14 MN1	SOD	delayed	27.3
2012-09-14 MN1	SOD	delayed	162.5
2012-09-14 MN1	SOD	delayed	111.8
2012-09-14 MN1	SOD	delayed	15.9
2012-09-14 MN1	SOD	delayed	21.9
2012-09-14 MN1	SOD	delayed	85.1
2012-09-14 MN1	SOD	delayed	81.8
2012-09-14 MN1	SOD	delayed	64.5
2012-09-14 MN1	SOD	delayed	37
2012-09-14 MN1	SOD	delayed	58
2012-09-14 MN1	SOD	delayed	15.2
2012-09-14 MN1	SOD	delayed	23.6
2012-09-14 MN1	SOD	delayed	117.4
2012-09-14 MN1	SOD	delayed	84.7
2012-09-14 MN1	SOD	delayed	125.2
2012-09-14 MN1	SOD	delayed	215.8
2012-09-14 MN1	SOD	delayed	267.2
2012-09-14 MN1	SOD	delayed	48.5
2012-09-14 MN1	SOD	delayed	149.8
2012-09-14 MN1	SOD	delayed	421.4
2012-09-14 MN1	SOD	delayed	144
2012-09-14 MN1	SOD	delayed	81
2012-09-14 MN1	SOD	delayed	59.8
2012-09-14 MN1	SOD	delayed	369.1
2012-09-14 MN1	SOD	delayed	108
2012-09-14 MN1	SOD	delayed	255.9
2012-09-14 MN1	SOD	delayed	146.7
2012-09-14 MN1	SOD	delayed	383.1
2012-09-14 MN1	SOD	delayed	14.9
2012-09-14 MN1	SOD	delayed	99.6
2012-09-14 MN1	SOD	delayed	197.2
2012-09-14 MN1	SOD	delayed	66.4
2012-09-14 MN1	SOD	delayed	47
2012-09-14 MN1	SOD	delayed	245.5
2012-09-14 MN1	SOD	delayed	223.8
2012-09-14 MN1	SOD	delayed	23.1
2012-09-14 MN1	SOD	delayed	175.9
2012-09-14 MN1	SOD	delayed	30.1
2012-09-14 MN1	SOD	delayed	214.1
2012-09-14 MN1	SOD	delayed	53.6
2012-09-14 MN1	SOD	delayed	47.3
2012-09-14 MN1	SOD	delayed	221
2012-09-14 MN1	SOD	delayed	107.1
2012-09-14 MN1	SOD	delayed	115.7
2012-09-14 MN1	SOD	delayed	101.4
2012-09-14 MN1	SOD	delayed	6.3
2012-09-14 MN1	SOD	delayed	181
2012-09-14 MN1	SOD	delayed	197.6
2012-09-14 MN1	SOD	delayed	70.6
2012-09-14 MN1	SOD	delayed	21
2012-09-14 MN1	SOD	delayed	444.2
2012-09-14 MN1	SOD	delayed	36.9
2012-09-14 MN1	SOD	delayed	12.1
2012-09-14 MN1	SOD	delayed	741.8
2012-09-14 MN1	SOD	delayed	15
2012-09-14 MN1	SOD	delayed	25.5
2012-09-14 MN1	SOD	delayed	28.6
2012-09-14 MN1	SOD	delayed	149.2
2012-09-14 MN1	SOD	delayed	19.9
2012-09-14 MN1	SOD	delayed	127.4
2012-09-14 MN1	SOD	delayed	76.4
2012-09-14 MN1	SOD	delayed	70.8
2012-09-14 MN1	SOD	delayed	63.4
2012-09-14 MN1	SOD	delayed	315.5
2012-09-14 MN1	SOD	delayed	97.1
2012-09-14 MN1	SOD	delayed	297.1
2012-09-14 MN1	SOD	delayed	89.6
2012-09-14 MN1	SOD	delayed	161.3
2012-09-14 MN1	SOD	delayed	14.1
2012-09-14 MN1	SOD	delayed	301.5
2012-09-14 MN1	SOD	delayed	170.4
2012-09-14 MN1	SOD	delayed	50.2
2012-09-14 MN1	SOD	delayed	26.1
2012-09-14 MN1	SOD	delayed	28.6
2012-09-14 MN1	SOD	delayed	131.6
2012-09-14 MN1	SOD	delayed	349.3
2012-09-14 MN1	SOD	delayed	91.8
2012-09-14 MN1	SOD	delayed	29.4
2012-09-14 MN1	SOD	delayed	12.8
2012-09-14 MN1	SOD	delayed	58.2
2012-09-14 MN1	SOD	delayed	89.5
2012-09-14 MN1	SOD	delayed	110
2012-09-14 MN1	SOD	delayed	214.1
2012-09-14 MN1	SOD	delayed	38.5
2012-09-14 MN1	SOD	delayed	85.3
2012-09-14 MN1	SOD	delayed	21.8
2012-09-14 MN1	SOD	delayed	85.3
2012-09-14 MN1	SOD	delayed	38.3
2012-09-14 MN1	SOD	delayed	93.2
2012-09-14 MN1	SOD	delayed	56.8
2012-09-14 MN1	SOD	delayed	52.7
2012-09-14 MN1	SOD	delayed	93.5
2012-09-14 MN1	SOD	delayed	66.7
2012-09-14 MN1	SOD	delayed	71.7
2012-09-14 MN1	SOD	delayed	70.1
2012-09-14 MN1	SOD	delayed	191.9
2012-09-14 MN1	SOD	delayed	97.4
2012-09-14 MN1	SOD	delayed	61.9
2012-09-14 MN1	SOD	delayed	47.4
2012-09-14 MN1	SOD	delayed	27.9
2012-09-14 MN1	SOD	delayed	32.2
2012-09-14 MN1	SOD	delayed	73
2012-09-14 MN1	SOD	delayed	199.4
2012-09-14 MN1	SOD	delayed	184.7
2012-09-14 MN1	SOD	delayed	124.1
2012-09-14 MN1	SOD	delayed	288.2
2012-09-14 MN1	SOD	delayed	177.1
2012-09-14 MN1	SOD	delayed	94.2
2012-09-14 MN1	SOD	delayed	111.9
2012-09-14 MN1	SOD	delayed	92.9
2012-09-14 MN1	SOD	delayed	87.7
2012-09-14 MN1	SOD	delayed	78.9
2012-09-14 MN1	SOD	delayed	25.1
2012-09-14 MN1	SOD	delayed	131.1
2012-09-14 MN1	SOD	delayed	549.5
2012-09-14 MN1	SOD	delayed	28.8
2012-09-14 MN1	SOD	delayed	80.6
2012-09-14 MN1	SOD	delayed	14.8
2012-09-14 MN1	SOD	delayed	46
2012-09-14 MN1	SOD	delayed	57.1
2012-09-14 MN1	SOD	delayed	16
2012-09-14 MN1	SOD	delayed	18.9
2012-09-14 MN1	SOD	delayed	2.7
2012-09-14 MN1	SOD	delayed	56.9
2012-09-14 MN1	SOD	delayed	54.6
2012-09-14 MN1	SOD	delayed	306.2
2012-09-14 MN1	SOD	delayed	27.8
2012-09-14 MN1	SOD	delayed	70.5
2012-09-14 MN1	SOD	delayed	203.7
2012-09-14 MN1	SOD	delayed	5.2
2012-09-14 MN1	SOD	delayed	103.3
2012-09-14 MN1	SOD	delayed	29.1
2012-09-14 MN1	SOD	delayed	14.5
2012-09-14 MN1	SOD	delayed	6.4
2012-09-14 MN2	SOD	delayed	284.4
2012-09-14 MN2	SOD	delayed	227.3
2012-09-14 MN2	SOD	delayed	137.9
2012-09-14 MN2	SOD	delayed	290.1
2012-09-14 MN2	SOD	delayed	364.9
2012-09-14 MN2	SOD	delayed	51
2012-09-14 MN2	SOD	delayed	124.5
2012-09-14 MN2	SOD	delayed	3.9
2012-09-14 MN2	SOD	delayed	38.4
2012-09-14 MN2	SOD	delayed	11.5
2012-09-14 MN2	SOD	delayed	279.2
2012-09-14 MN2	SOD	delayed	92.1
2012-09-14 MN2	SOD	delayed	0.6
2012-09-14 MN2	SOD	delayed	268.5
2012-09-14 MN2	SOD	delayed	170.4
2012-09-14 MN2	SOD	delayed	66.3
2012-09-14 MN2	SOD	delayed	113.4
2012-09-14 MN2	SOD	delayed	74.5
2012-09-14 MN2	SOD	delayed	229.1
2012-09-14 MN2	SOD	delayed	32.2
2012-09-14 MN2	SOD	delayed	71.4
2012-09-14 MN2	SOD	delayed	6
2012-09-14 MN2	SOD	delayed	52.9
2012-09-14 MN2	SOD	delayed	102.9
2012-09-14 MN2	SOD	delayed	13.6
2012-09-14 MN2	SOD	delayed	186.4
2012-09-14 MN2	SOD	delayed	202.9
2012-09-14 MN2	SOD	delayed	27.3
2012-09-14 MN2	SOD	delayed	29.7
2012-09-14 MN2	SOD	delayed	19.9
2012-09-14 MN2	SOD	delayed	25.3
2012-09-14 MN2	SOD	delayed	37.1
2012-09-14 MN2	SOD	delayed	300.5
2012-09-14 MN2	SOD	delayed	135.8
2012-09-14 MN2	SOD	delayed	14.1
2012-09-14 MN2	SOD	delayed	205.2
2012-09-14 MN2	SOD	delayed	35.8
2012-09-14 MN2	SOD	delayed	24.3
2012-09-14 MN2	SOD	delayed	5.6
2012-09-14 MN2	SOD	delayed	8.9
2012-09-14 MN2	SOD	delayed	96.9
2012-09-14 MN2	SOD	delayed	4.9
2012-09-14 MN2	SOD	delayed	3.4
2012-09-14 MN2	SOD	delayed	204.6
2012-09-14 MN2	SOD	delayed	92.1
2012-09-14 MN2	SOD	delayed	14.6
2012-09-14 MN2	SOD	delayed	26.8
2012-09-14 MN2	SOD	delayed	280.1
2012-09-14 MN2	SOD	delayed	27.6
2012-09-14 MN2	SOD	delayed	76.3
2012-09-14 MN2	SOD	delayed	170.3
2012-09-14 MN2	SOD	delayed	11.1
2012-09-14 MN2	SOD	delayed	6.7
2012-09-14 MN2	SOD	delayed	54.5
2012-09-14 MN2	SOD	delayed	66.7
2012-09-14 MN2	SOD	delayed	16.6
2012-09-14 MN2	SOD	delayed	33.3
2012-09-14 MN2	SOD	delayed	39.8
2012-09-14 MN2	SOD	delayed	4.6
2012-09-14 MN2	SOD	delayed	6.2
2012-09-14 MN2	SOD	delayed	47.5
2012-09-14 MN2	SOD	delayed	28.5
2012-09-14 MN2	SOD	delayed	19
2012-09-14 MN2	SOD	delayed	136
2012-09-14 MN2	SOD	delayed	154.4
2012-09-14 MN2	SOD	delayed	77.6
2012-09-14 MN2	SOD	delayed	32.2
2012-09-14 MN2	SOD	delayed	67
2012-09-14 MN2	SOD	delayed	2.4
2012-09-14 MN2	SOD	delayed	224.6
2012-09-14 MN2	SOD	delayed	256.9
2012-09-14 MN2	SOD	delayed	128.7
2012-09-14 MN2	SOD	delayed	117.9
2012-09-14 MN2	SOD	delayed	278.9
2012-09-14 MN2	SOD	delayed	3.9
2012-09-14 MN2	SOD	delayed	312.1
2012-09-14 MN2	SOD	delayed	81.1
2012-09-14 MN2	SOD	delayed	98.3
2012-09-14 MN2	SOD	delayed	151.4
2012-09-14 MN2	SOD	delayed	13.2
2012-09-14 MN2	SOD	delayed	45.1
2012-09-14 MN2	SOD	delayed	97.9
2012-09-14 MN2	SOD	delayed	113.3
2012-09-14 MN2	SOD	delayed	3.6
2012-09-14 MN2	SOD	delayed	14.3
2012-09-14 MN2	SOD	delayed	36.5
2012-09-14 MN2	SOD	delayed	31.4
2012-09-14 MN2	SOD	delayed	43.7
2012-09-14 MN2	SOD	delayed	49.3
2012-09-14 MN2	SOD	delayed	106
2012-09-14 MN2	SOD	delayed	128.8
2012-09-14 MN2	SOD	delayed	24.9
2012-09-14 MN2	SOD	delayed	292.2
2012-09-14 MN2	SOD	delayed	18.8
2012-09-14 MN2	SOD	delayed	21.2
2012-09-14 MN2	SOD	delayed	32.1
2012-09-14 MN2	SOD	delayed	13
2012-09-14 MN2	SOD	delayed	44.1
2012-09-14 MN2	SOD	delayed	118
2012-09-14 MN2	SOD	delayed	65.2
2012-09-14 MN2	SOD	delayed	6.1
2012-09-14 MN2	SOD	delayed	198.9
2012-09-14 MN2	SOD	delayed	8.5
2012-09-14 MN2	SOD	delayed	18.8
2012-09-14 MN2	SOD	delayed	209.9
2012-09-14 MN2	SOD	delayed	19.7
2012-09-14 MN2	SOD	delayed	37.3
2012-09-14 MN2	SOD	delayed	91.2
2012-09-14 MN2	SOD	delayed	126.2
2012-09-14 MN2	SOD	delayed	110.8
2012-09-14 MN2	SOD	delayed	8
2012-09-14 MN3	SOD	delayed?	145.4
2012-09-14 MN3	SOD	delayed?	88.1
2012-09-14 MN3	SOD	delayed?	130
2012-09-14 MN3	SOD	delayed?	23.1
2012-09-14 MN3	SOD	delayed?	39.9
2012-09-14 MN3	SOD	delayed?	87.4
2012-09-14 MN3	SOD	delayed?	27.5
2012-09-14 MN3	SOD	delayed?	30.2
2012-09-14 MN3	SOD	delayed?	11.5
2012-09-14 MN3	SOD	delayed?	19.4
2012-09-14 MN3	SOD	delayed?	66
2012-09-14 MN3	SOD	delayed?	30.9
2012-09-14 MN3	SOD	delayed?	97.2
2012-09-14 MN3	SOD	delayed?	27
2012-09-14 MN3	SOD	delayed?	16.6
2012-09-14 MN3	SOD	delayed?	118.9
2012-09-14 MN3	SOD	delayed?	22.5
2012-09-14 MN3	SOD	delayed?	21
2012-09-14 MN3	SOD	delayed?	7.7
2012-09-14 MN3	SOD	delayed?	7.2
2012-09-14 MN3	SOD	delayed?	9.2
2012-09-14 MN3	SOD	delayed?	47
2012-09-14 MN3	SOD	delayed?	3
2012-09-14 MN3	SOD	delayed?	32.9
2012-09-14 MN3	SOD	delayed?	24.7
2012-09-14 MN3	SOD	delayed?	26.4
2012-09-14 MN3	SOD	delayed?	78.7
2012-09-14 MN3	SOD	delayed?	201.9
2012-09-14 MN3	SOD	delayed?	59.3
2012-09-14 MN3	SOD	delayed?	214.7
2012-09-14 MN3	SOD	delayed?	309.4
2012-09-14 MN3	SOD	delayed?	52.7
2012-09-14 MN3	SOD	delayed?	271.2
2012-09-14 MN3	SOD	delayed?	61.2
2012-09-14 MN3	SOD	delayed?	166
2012-09-14 MN3	SOD	delayed?	55.6
2012-09-14 MN3	SOD	delayed?	34.4
2012-09-14 MN3	SOD	delayed?	15.9
2012-09-14 MN3	SOD	delayed?	139.3
2012-09-14 MN3	SOD	delayed?	39.4
2012-09-14 MN3	SOD	delayed?	34.8
2012-09-14 MN3	SOD	delayed?	286
2012-09-14 MN3	SOD	delayed?	32.3
2012-09-14 MN3	SOD	delayed?	26.7
2012-09-14 MN3	SOD	delayed?	104.2
2012-09-14 MN3	SOD	delayed?	247
2012-09-14 MN3	SOD	delayed?	97.5
2012-09-14 MN3	SOD	delayed?	49.4
2012-09-14 MN3	SOD	delayed?	64.1
2012-09-14 MN3	SOD	delayed?	256.7
2012-09-14 MN3	SOD	delayed?	102.5
2012-09-14 MN3	SOD	delayed?	122.7
2012-09-14 MN3	SOD	delayed?	312.2
2012-09-14 MN3	SOD	delayed?	28.8
2012-09-14 MN3	SOD	delayed?	15.9
2012-09-14 MN3	SOD	delayed?	42.7
2012-09-14 MN3	SOD	delayed?	6.5
2012-09-14 MN3	SOD	delayed?	135.1
2012-09-14 MN3	SOD	delayed?	48.1
2012-09-14 MN3	SOD	delayed?	116.5
2012-09-14 MN3	SOD	delayed?	68.1
2012-09-14 MN3	SOD	delayed?	70.1
2012-09-14 MN3	SOD	delayed?	34.5
2012-09-14 MN3	SOD	delayed?	73.9
2012-09-14 MN3	SOD	delayed?	20.1
2012-09-14 MN3	SOD	delayed?	69.6
2012-09-14 MN3	SOD	delayed?	31.4
2012-09-14 MN3	SOD	delayed?	60
2012-09-14 MN3	SOD	delayed?	93.7
2012-09-14 MN3	SOD	delayed?	28.4
2012-09-14 MN3	SOD	delayed?	23.1
2012-09-14 MN3	SOD	delayed?	75.3
2012-09-14 MN3	SOD	delayed?	84
2012-09-14 MN3	SOD	delayed?	26.1
2012-09-14 MN3	SOD	delayed?	51.6
2012-09-14 MN3	SOD	delayed?	4.3
2012-09-14 MN3	SOD	delayed?	13.6
2012-09-14 MN3	SOD	delayed?	48.7
2012-09-14 MN3	SOD	delayed?	215.9
2012-09-14 MN3	SOD	delayed?	379.5
2012-09-14 MN3	SOD	delayed?	494.1
2012-09-14 MN3	SOD	delayed?	39.9
2012-09-14 MN3	SOD	delayed?	249
2012-09-14 MN3	SOD	delayed?	194.3
2012-09-14 MN3	SOD	delayed?	121.2
2012-09-14 MN3	SOD	delayed?	49.2
2012-09-14 MN3	SOD	delayed?	76.5
2012-09-14 MN3	SOD	delayed?	334.3
2012-09-14 MN3	SOD	delayed?	215.2
2012-09-14 MN3	SOD	delayed?	23.3
2012-09-14 MN3	SOD	delayed?	197.8
2012-09-14 MN3	SOD	delayed?	217.8
2012-09-14 MN3	SOD	delayed?	29.1
2012-09-14 MN3	SOD	delayed?	13.5
2012-09-14 MN3	SOD	delayed?	221.7
2012-09-14 MN3	SOD	delayed?	40.9
2012-09-14 MN3	SOD	delayed?	11.3
2012-09-14 MN3	SOD	delayed?	9.9
2012-09-14 MN3	SOD	delayed?	254.7
2012-09-14 MN3	SOD	delayed?	323.3
2012-09-14 MN3	SOD	delayed?	282.4
2012-09-14 MN3	SOD	delayed?	109
2012-09-14 MN3	SOD	delayed?	164.1
2012-09-14 MN3	SOD	delayed?	155.9
2012-09-14 MN3	SOD	delayed?	8.5
2012-09-14 MN3	SOD	delayed?	440.4
2012-09-14 MN3	SOD	delayed?	25
2012-09-14 MN3	SOD	delayed?	34.8
2012-09-14 MN3	SOD	delayed?	185
2012-09-14 MN3	SOD	delayed?	2.9
2012-09-14 MN3	SOD	delayed?	396.7
2012-09-14 MN3	SOD	delayed?	11.5
2012-09-14 MN3	SOD	delayed?	20.3
2012-09-14 MN3	SOD	delayed?	132.4
2012-09-14 MN3	SOD	delayed?	90.5
2012-09-14 MN3	SOD	delayed?	20.3
2012-09-14 MN3	SOD	delayed?	49.2
2012-09-14 MN3	SOD	delayed?	120.1
2012-09-14 MN3	SOD	delayed?	21.7
2012-09-14 MN3	SOD	delayed?	510.9
2012-09-14 MN3	SOD	delayed?	18.4
2012-09-14 MN3	SOD	delayed?	457.2
2012-09-14 MN3	SOD	delayed?	189.6
2012-09-14 MN3	SOD	delayed?	129.2
2012-09-14 MN3	SOD	delayed?	82
2012-09-14 MN3	SOD	delayed?	85.9
2012-09-14 MN3	SOD	delayed?	60.5
2012-09-14 MN3	SOD	delayed?	376.5
2012-09-14 MN3	SOD	delayed?	17.4
2012-09-14 MN3	SOD	delayed?	490.4
2012-09-14 MN3	SOD	delayed?	7.7
2012-09-14 MN3	SOD	delayed?	66.7
2012-09-14 MN3	SOD	delayed?	48.7
2012-09-14 MN3	SOD	delayed?	192.5
2012-09-14 MN3	SOD	delayed?	252.7
2012-09-14 MN3	SOD	delayed?	17.5
2012-09-14 MN3	SOD	delayed?	24.9
2012-09-14 MN3	SOD	delayed?	12.4
2012-09-14 MN3	SOD	delayed?	23
2012-09-14 MN3	SOD	delayed?	27.9
2012-09-14 MN3	SOD	delayed?	37.6
2012-09-14 MN3	SOD	delayed?	15.8
2012-09-14 MN3	SOD	delayed?	13.2
2012-09-14 MN3	SOD	delayed?	111.8
2012-09-14 MN3	SOD	delayed?	97.6
2012-09-14 MN3	SOD	delayed?	36.9
2012-09-14 MN3	SOD	delayed?	213.2
2012-09-14 MN3	SOD	delayed?	178.2
2012-09-14 MN3	SOD	delayed?	18.2
2012-09-14 MN3	SOD	delayed?	52.1
2012-09-14 MN3	SOD	delayed?	33
2012-09-14 MN3	SOD	delayed?	52
2012-09-14 MN3	SOD	delayed?	12.5
2012-09-14 MN3	SOD	delayed?	31.2
2012-09-14 MN3	SOD	delayed?	45.9
2012-09-14 MN3	SOD	delayed?	57.6
2012-09-14 MN3	SOD	delayed?	3.4
2012-09-14 MN3	SOD	delayed?	14.3
2012-09-14 MN3	SOD	delayed?	1.9
2012-09-14 MN3	SOD	delayed?	48.5
2012-09-14 MN3	SOD	delayed?	53.7
2012-09-14 MN3	SOD	delayed?	38.7
2012-09-14 MN3	SOD	delayed?	14.3
2012-09-14 MN3	SOD	delayed?	125.1
2012-09-14 MN3	SOD	delayed?	29
2012-09-14 MN3	SOD	delayed?	12.9
2012-09-14 MN3	SOD	delayed?	96.2
2012-09-14 MN3	SOD	delayed?	103.2
2012-09-14 MN3	SOD	delayed?	10
2012-09-14 MN3	SOD	delayed?	11.8
2012-09-14 MN3	SOD	delayed?	16.2
2012-09-14 MN3	SOD	delayed?	21.1
2012-09-14 MN3	SOD	delayed?	11.4
2012-09-14 MN3	SOD	delayed?	11.3
2012-09-14 MN3	SOD	delayed?	21.2
2012-09-14 MN3	SOD	delayed?	14.1
2012-09-14 MN3	SOD	delayed?	30
2012-09-14 MN3	SOD	delayed?	100
2012-09-14 MN3	SOD	delayed?	130.6
2012-09-14 MN3	SOD	delayed?	41.6
2012-09-14 MN3	SOD	delayed?	81.2
2012-09-14 MN3	SOD	delayed?	10.1
2012-09-14 MN3	SOD	delayed?	8.9
2012-09-14 MN3	SOD	delayed?	7.9
2012-09-14 MN3	SOD	delayed?	48.1
2012-09-14 MN3	SOD	delayed?	8.7
2012-09-14 MN3	SOD	delayed?	6.9
2012-09-14 MN3	SOD	delayed?	10.2
2012-09-14 MN3	SOD	delayed?	86.9
2012-09-14 MN3	SOD	delayed?	48.5
2012-09-14 MN3	SOD	delayed?	3.8
2012-09-14 MN3	SOD	delayed?	17.4
2012-09-14 MN3	SOD	delayed?	9.1
2012-09-14 MN3	SOD	delayed?	42.4
2012-09-14 MN3	SOD	delayed?	31.5
2012-09-14 MN3	SOD	delayed?	40.6
2012-09-14 MN3	SOD	delayed?	0.5
2012-09-14 MN3	SOD	delayed?	29
2012-09-14 MN3	SOD	delayed?	177.2
2012-09-14 MN3	SOD	delayed?	167.5
2012-09-14 MN3	SOD	delayed?	83.4
2012-09-14 MN3	SOD	delayed?	41.7
2012-09-14 MN3	SOD	delayed?	135.6
2012-09-14 MN3	SOD	delayed?	79.4
2012-09-14 MN3	SOD	delayed?	252.3
2012-09-14 MN3	SOD	delayed?	163.8
2012-09-14 MN3	SOD	delayed?	14.9
2012-09-14 MN3	SOD	delayed?	127.4
2012-09-14 MN3	SOD	delayed?	121.4
2012-09-14 MN3	SOD	delayed?	3.6
2012-09-14 MN3	SOD	delayed?	57.2
2012-09-14 MN3	SOD	delayed?	6
2012-09-14 MN3	SOD	delayed?	83.5
2012-09-14 MN3	SOD	delayed?	13.2
2012-09-14 MN3	SOD	delayed?	76.4
2012-09-14 MN3	SOD	delayed?	15.8
2012-09-14 MN3	SOD	delayed?	37.6
2012-09-14 MN3	SOD	delayed?	100.4
2012-09-14 MN3	SOD	delayed?	65.5
2012-09-14 MN3	SOD	delayed?	23.7
2012-09-14 MN3	SOD	delayed?	46.4
2012-09-14 MN3	SOD	delayed?	180.2
2012-09-14 MN3	SOD	delayed?	9
2012-09-14 MN3	SOD	delayed?	85
2012-09-14 MN3	SOD	delayed?	337.2
2012-09-14 MN3	SOD	delayed?	39.1
2012-09-21 MN2	WT	immediate	96.9
2012-09-21 MN2	WT	immediate	64
2012-09-21 MN2	WT	immediate	82.1
2012-09-21 MN2	WT	immediate	93.8
2012-09-21 MN2	WT	immediate	15.6
2012-09-21 MN2	WT	immediate	232.4
2012-09-21 MN2	WT	immediate	93.9
2012-09-21 MN2	WT	immediate	12.1
2012-09-21 MN2	WT	immediate	23.2
2012-09-21 MN2	WT	immediate	52.1
2012-09-21 MN2	WT	immediate	39.8
2012-09-21 MN2	WT	immediate	7.3
2012-09-21 MN2	WT	immediate	52.7
2012-09-21 MN2	WT	immediate	65.3
2012-09-21 MN2	WT	immediate	74.2
2012-09-21 MN2	WT	immediate	72.7
2012-09-21 MN2	WT	immediate	53.5
2012-09-21 MN2	WT	immediate	44.6
2012-09-21 MN2	WT	immediate	27.5
2012-09-21 MN2	WT	immediate	17.7
2012-09-21 MN2	WT	immediate	232.6
2012-09-21 MN2	WT	immediate	89.6
2012-09-21 MN2	WT	immediate	87.4
2012-09-21 MN2	WT	immediate	127.9
2012-09-21 MN2	WT	immediate	3.8
2012-09-21 MN2	WT	immediate	34
2012-09-21 MN2	WT	immediate	22.7
2012-09-21 MN2	WT	immediate	79.1
2012-09-21 MN2	WT	immediate	31.2
2012-09-21 MN2	WT	immediate	82.9
2012-09-21 MN2	WT	immediate	74.5
2012-09-21 MN2	WT	immediate	63.6
2012-09-21 MN2	WT	immediate	27.5
2012-09-21 MN2	WT	immediate	9.9
2012-09-21 MN2	WT	immediate	58.2
2012-09-21 MN2	WT	immediate	125.7
2012-09-21 MN2	WT	immediate	60.2
2012-09-21 MN2	WT	immediate	33.3
2012-09-21 MN2	WT	immediate	31.6
2012-09-21 MN2	WT	immediate	14.8
2012-09-21 MN2	WT	immediate	184.5
2012-09-21 MN2	WT	immediate	24.8
2012-09-21 MN2	WT	immediate	18.4
2012-09-21 MN2	WT	immediate	95.5
2012-09-21 MN2	WT	immediate	19.6
2012-09-21 MN2	WT	immediate	17.1
2012-09-21 MN2	WT	immediate	122.1
2012-09-21 MN2	WT	immediate	53.9
2012-09-21 MN2	WT	immediate	87.4
2012-09-21 MN2	WT	immediate	39.8
2012-09-21 MN2	WT	immediate	51.5
2012-09-21 MN2	WT	immediate	98.5
2012-09-21 MN2	WT	immediate	70.4
2012-09-21 MN2	WT	immediate	84.9
2012-09-21 MN2	WT	immediate	59.3
2012-09-21 MN2	WT	immediate	110.3
2012-09-21 MN2	WT	immediate	34.8
2012-09-21 MN2	WT	immediate	133.4
2012-09-21 MN2	WT	immediate	34.4
2012-09-21 MN2	WT	immediate	25.1
2012-09-21 MN2	WT	immediate	81.2
2012-09-21 MN2	WT	immediate	30.7
2012-09-21 MN2	WT	immediate	8
2012-09-21 MN2	WT	immediate	156.3
2012-09-21 MN2	WT	immediate	6.2
2012-09-21 MN2	WT	immediate	278
2012-09-21 MN2	WT	immediate	67.8
2012-09-21 MN2	WT	immediate	172.4
2012-09-21 MN2	WT	immediate	47.7
2012-09-21 MN2	WT	immediate	3.2
2012-09-21 MN2	WT	immediate	4.1
2012-09-21 MN2	WT	immediate	17.1
2012-09-21 MN2	WT	immediate	15.1
2012-09-21 MN2	WT	immediate	15.2
2012-09-21 MN2	WT	immediate	80.4
2012-09-21 MN2	WT	immediate	101.8
2012-09-21 MN2	WT	immediate	99.4
2012-09-21 MN2	WT	immediate	64.7
2012-09-21 MN2	WT	immediate	33.3
2012-09-21 MN2	WT	immediate	80.4
2012-09-21 MN2	WT	immediate	23.9
2012-09-21 MN2	WT	immediate	65.7
2012-09-21 MN2	WT	immediate	178.8
2012-09-21 MN2	WT	immediate	35.1
2012-09-21 MN2	WT	immediate	91.8
2012-09-21 MN2	WT	immediate	58.3
2012-09-21 MN2	WT	immediate	15.7
2012-09-21 MN2	WT	immediate	56.9
2012-09-21 MN2	WT	immediate	167.9
2012-09-21 MN2	WT	immediate	83.3
2012-09-21 MN2	WT	immediate	67
2012-09-21 MN2	WT	immediate	4.8
2012-09-21 MN2	WT	immediate	3.6
2012-09-21 MN2	WT	immediate	16.9
2012-09-21 MN2	WT	immediate	13.9
2012-09-21 MN2	WT	immediate	5.6
2012-10-10 MN1	WT	delayed	202
2012-10-10 MN1	WT	delayed	139.8
2012-10-10 MN1	WT	delayed	83.4
2012-10-10 MN1	WT	delayed	115.4
2012-10-10 MN1	WT	delayed	43
2012-10-10 MN1	WT	delayed	19.5
2012-10-10 MN1	WT	delayed	142.9
2012-10-10 MN1	WT	delayed	68.5
2012-10-10 MN1	WT	delayed	71.3
2012-10-10 MN1	WT	delayed	6.4
2012-10-10 MN1	WT	delayed	135.8
2012-10-10 MN1	WT	delayed	258.9
2012-10-10 MN1	WT	delayed	83.1
2012-10-10 MN1	WT	delayed	81
2012-10-10 MN1	WT	delayed	36.8
2012-10-10 MN1	WT	delayed	28
2012-10-10 MN1	WT	delayed	26.4
2012-10-10 MN1	WT	delayed	90.5
2012-10-10 MN1	WT	delayed	50.7
2012-10-10 MN1	WT	delayed	4.5
2012-10-10 MN1	WT	delayed	26.5
2012-10-10 MN1	WT	delayed	52.9
2012-10-10 MN1	WT	delayed	64.7
2012-10-10 MN1	WT	delayed	25.3
2012-10-10 MN1	WT	delayed	70.5
2012-10-10 MN1	WT	delayed	4.2
2012-10-10 MN1	WT	delayed	92.6
2012-10-10 MN1	WT	delayed	56.1
2012-10-10 MN1	WT	delayed	95
2012-10-10 MN1	WT	delayed	19.8
2012-10-10 MN1	WT	delayed	44.6
2012-10-10 MN1	WT	delayed	51.9
2012-10-10 MN1	WT	delayed	71.3
2012-10-10 MN1	WT	delayed	68.5
2012-10-10 MN1	WT	delayed	36.1
2012-10-10 MN1	WT	delayed	22.7
2012-10-10 MN1	WT	delayed	70.8
2012-10-10 MN1	WT	delayed	239.8
2012-10-10 MN1	WT	delayed	95.3
2012-10-10 MN1	WT	delayed	313.6
2012-10-10 MN1	WT	delayed	109.2
2012-10-10 MN1	WT	delayed	106.4
2012-10-10 MN1	WT	delayed	9.3
2012-10-10 MN1	WT	delayed	332.8
2012-10-10 MN1	WT	delayed	233.3
2012-10-10 MN1	WT	delayed	19.3
2012-10-10 MN1	WT	delayed	82
2012-10-10 MN1	WT	delayed	320.6
2012-10-10 MN1	WT	delayed	28.9
2012-10-10 MN1	WT	delayed	93.3
2012-10-10 MN1	WT	delayed	134.1
2012-10-10 MN1	WT	delayed	1.7
2012-10-10 MN1	WT	delayed	11
2012-10-10 MN1	WT	delayed	10.4
2012-10-10 MN1	WT	delayed	71.4
2012-10-10 MN1	WT	delayed	87.8
2012-10-10 MN1	WT	delayed	61.7
2012-10-10 MN1	WT	delayed	21.9
2012-10-10 MN1	WT	delayed	86.2
2012-10-10 MN1	WT	delayed	384.6
2012-10-10 MN1	WT	delayed	46.5
2012-10-10 MN1	WT	delayed	73.3
2012-10-10 MN1	WT	delayed	232.9
2012-10-10 MN1	WT	delayed	30
2012-10-10 MN1	WT	delayed	38
2012-10-10 MN1	WT	delayed	48
2012-10-10 MN1	WT	delayed	31.2
2012-10-10 MN1	WT	delayed	94.7
2012-10-10 MN1	WT	delayed	105.7
2012-10-10 MN1	WT	delayed	203.8
2012-10-10 MN1	WT	delayed	73
2012-10-10 MN1	WT	delayed	20.8
2012-10-10 MN1	WT	delayed	52.7
2012-10-10 MN1	WT	delayed	129.9
2012-10-10 MN1	WT	delayed	126.6
2012-10-10 MN1	WT	delayed	44.6
2012-10-10 MN1	WT	delayed	2.9
2012-10-10 MN1	WT	delayed	201.6
2012-10-10 MN1	WT	delayed	130.1
2012-10-10 MN1	WT	delayed	144.3
2012-10-10 MN1	WT	delayed	85.7
2012-10-10 MN1	WT	delayed	246.9
2012-10-10 MN1	WT	delayed	93.9
2012-10-10 MN1	WT	delayed	37.7
2012-10-10 MN1	WT	delayed	5.4
2012-10-10 MN1	WT	delayed	110.2
2012-10-10 MN1	WT	delayed	6.8
2012-10-10 MN2	WT	delayed	201.1
2012-10-10 MN2	WT	delayed	149.4
2012-10-10 MN2	WT	delayed	59.5
2012-10-10 MN2	WT	delayed	87.8
2012-10-10 MN2	WT	delayed	93.9
2012-10-10 MN2	WT	delayed	262.8
2012-10-10 MN2	WT	delayed	389.9
2012-10-10 MN2	WT	delayed	51.3
2012-10-10 MN2	WT	delayed	234.6
2012-10-10 MN2	WT	delayed	185.5
2012-10-10 MN2	WT	delayed	50.6
2012-10-10 MN2	WT	delayed	41.3
2012-10-10 MN2	WT	delayed	46.4
2012-10-10 MN2	WT	delayed	300.1
2012-10-10 MN2	WT	delayed	48.7
2012-10-10 MN2	WT	delayed	348.6
2012-10-10 MN2	WT	delayed	6.8
2012-10-10 MN2	WT	delayed	12.1
2012-10-10 MN2	WT	delayed	22.4
2012-10-10 MN2	WT	delayed	39.6
2012-10-10 MN2	WT	delayed	416.8
2012-10-10 MN2	WT	delayed	287.9
2012-10-10 MN2	WT	delayed	56.5
2012-10-10 MN2	WT	delayed	5.5
2012-10-10 MN2	WT	delayed	13.9
2012-10-10 MN2	WT	delayed	5.4
2012-10-10 MN2	WT	delayed	148.1
2012-10-10 MN2	WT	delayed	148.7
2012-10-10 MN2	WT	delayed	63.8
2012-10-10 MN2	WT	delayed	95.4
2012-10-10 MN2	WT	delayed	76.7
2012-10-10 MN2	WT	delayed	44.8
2012-10-10 MN2	WT	delayed	36.2
2012-10-10 MN2	WT	delayed	8.7
2012-10-10 MN2	WT	delayed	17.3
2012-10-10 MN2	WT	delayed	21.5
2012-10-10 MN2	WT	delayed	38.7
2012-10-10 MN2	WT	delayed	101.8
2012-10-10 MN2	WT	delayed	42
2012-10-10 MN2	WT	delayed	152
2012-10-10 MN2	WT	delayed	150
2012-10-10 MN2	WT	delayed	38.5
2012-10-10 MN2	WT	delayed	51
2012-10-10 MN2	WT	delayed	272.6
2012-10-10 MN2	WT	delayed	1.1
2012-10-10 MN2	WT	delayed	29.1
2012-10-10 MN2	WT	delayed	248.5
2012-10-10 MN2	WT	delayed	61.9
2012-10-10 MN2	WT	delayed	0.9
2012-10-10 MN2	WT	delayed	153.5
2012-10-10 MN2	WT	delayed	51.9
2012-10-10 MN2	WT	delayed	64.9
2012-10-10 MN2	WT	delayed	75.2
2012-10-10 MN2	WT	delayed	35.9
2012-10-10 MN2	WT	delayed	158.2
2012-10-10 MN2	WT	delayed	44.4
2012-10-10 MN2	WT	delayed	28.3
2012-10-10 MN2	WT	delayed	2.3
2012-10-10 MN2	WT	delayed	4.3
2012-10-10 MN2	WT	delayed	321.3
2012-10-10 MN2	WT	delayed	66.4
2012-10-10 MN2	WT	delayed	125
2012-10-10 MN2	WT	delayed	172
2012-10-10 MN2	WT	delayed	78.6
2012-10-10 MN2	WT	delayed	63.5
2012-10-10 MN2	WT	delayed	102.5
2012-10-10 MN2	WT	delayed	48.1
2012-10-10 MN2	WT	delayed	28.9
2012-10-10 MN2	WT	delayed	62.9
2012-10-10 MN2	WT	delayed	25.4
2012-10-2 MN1	WT	delayed	90.3
2012-10-2 MN1	WT	delayed	119.9
2012-10-2 MN1	WT	delayed	90.7
2012-10-2 MN1	WT	delayed	113.5
2012-10-2 MN1	WT	delayed	151.6
2012-10-2 MN1	WT	delayed	16.2
2012-10-2 MN1	WT	delayed	31.9
2012-10-2 MN1	WT	delayed	172.7
2012-10-2 MN1	WT	delayed	183.1
2012-10-2 MN1	WT	delayed	195.2
2012-10-2 MN1	WT	delayed	127.7
2012-10-2 MN1	WT	delayed	10.7
2012-10-2 MN1	WT	delayed	84.5
2012-10-2 MN1	WT	delayed	36.5
2012-10-2 MN1	WT	delayed	26.3
2012-10-2 MN1	WT	delayed	161.2
2012-10-2 MN1	WT	delayed	55.9
2012-10-2 MN1	WT	delayed	89.2
2012-10-2 MN1	WT	delayed	62.4
2012-10-2 MN1	WT	delayed	22.3
2012-10-2 MN1	WT	delayed	15.8
2012-10-2 MN1	WT	delayed	28.8
2012-10-2 MN1	WT	delayed	451
2012-10-2 MN1	WT	delayed	265
2012-10-2 MN1	WT	delayed	202.1
2012-10-2 MN1	WT	delayed	46.1
2012-10-2 MN1	WT	delayed	84.1
2012-10-2 MN1	WT	delayed	117.7
2012-10-2 MN1	WT	delayed	124.3
2012-10-2 MN1	WT	delayed	151.7
2012-10-2 MN1	WT	delayed	145.6
2012-10-2 MN1	WT	delayed	453.6
2012-10-2 MN1	WT	delayed	117.7
2012-10-2 MN1	WT	delayed	104.9
2012-10-2 MN1	WT	delayed	6.7
2012-10-2 MN1	WT	delayed	154.7
2012-10-2 MN1	WT	delayed	199.4
2012-10-2 MN1	WT	delayed	38.6
2012-10-2 MN1	WT	delayed	51.2
2012-10-2 MN1	WT	delayed	226.8
2012-10-2 MN1	WT	delayed	121
2012-10-2 MN1	WT	delayed	107.7
2012-10-2 MN1	WT	delayed	73
2012-10-2 MN1	WT	delayed	232.6
2012-10-2 MN1	WT	delayed	90.2
2012-10-2 MN1	WT	delayed	77.7
2012-10-2 MN1	WT	delayed	246.7
2012-10-2 MN1	WT	delayed	21.5
2012-10-2 MN1	WT	delayed	195.1
2012-10-2 MN1	WT	delayed	182.6
2012-10-2 MN1	WT	delayed	385.1
2012-10-2 MN1	WT	delayed	292
2012-10-2 MN1	WT	delayed	106.7
2012-10-2 MN1	WT	delayed	146.3
2012-10-2 MN1	WT	delayed	16.2
2012-10-2 MN1	WT	delayed	80.9
2012-10-2 MN1	WT	delayed	66.4
2012-10-2 MN1	WT	delayed	377.6
2012-10-2 MN1	WT	delayed	99.8
2012-10-2 MN1	WT	delayed	31.3
2012-10-2 MN1	WT	delayed	20.9
2012-10-2 MN1	WT	delayed	37.4
2012-10-2 MN1	WT	delayed	0.3
2012-10-2 MN1	WT	delayed	17.7
2012-10-2 MN1	WT	delayed	117.2
2012-10-2 MN1	WT	delayed	52.9
2012-10-2 MN1	WT	delayed	175.5
2012-10-2 MN1	WT	delayed	59.9
2012-10-2 MN1	WT	delayed	56.9
2012-10-2 MN1	WT	delayed	63.1
2012-10-2 MN1	WT	delayed	32.2
2012-10-2 MN1	WT	delayed	32.8
2012-10-2 MN1	WT	delayed	119.8
2012-10-2 MN1	WT	delayed	12.7
2012-10-2 MN1	WT	delayed	306.4
2012-10-2 MN1	WT	delayed	107.3
2012-10-2 MN1	WT	delayed	17.1
2012-10-2 MN1	WT	delayed	70
2012-10-2 MN1	WT	delayed	40.4
2012-10-2 MN1	WT	delayed	52.9
2012-10-2 MN1	WT	delayed	58.5
2012-10-2 MN1	WT	delayed	67.5
2012-10-2 MN1	WT	delayed	268.5
2012-10-2 MN1	WT	delayed	98.7
2012-10-2 MN1	WT	delayed	80.9
2012-10-2 MN1	WT	delayed	100.5
2012-10-2 MN1	WT	delayed	78.5
2012-10-2 MN1	WT	delayed	30.2
2012-10-2 MN1	WT	delayed	107.4
2012-10-2 MN1	WT	delayed	300.6
2012-10-2 MN1	WT	delayed	30.7
2012-10-2 MN1	WT	delayed	78.5
2012-10-2 MN1	WT	delayed	14.7
2012-10-2 MN1	WT	delayed	132.7
2012-10-2 MN1	WT	delayed	85.1
2012-10-2 MN1	WT	delayed	32.3
2012-10-2 MN1	WT	delayed	100.7
2012-10-2 MN1	WT	delayed	50.8
2012-10-2 MN1	WT	delayed	55.4
2012-10-2 MN1	WT	delayed	13.6
2012-10-2 MN1	WT	delayed	15.1
2012-11-09 MN2	WT	delayed	141.1
2012-11-09 MN2	WT	delayed	303.8
2012-11-09 MN2	WT	delayed	50.1
2012-11-09 MN2	WT	delayed	251.5
2012-11-09 MN2	WT	delayed	77.4
2012-11-09 MN2	WT	delayed	0.6
2012-11-09 MN2	WT	delayed	231.6
2012-11-09 MN2	WT	delayed	67.4
2012-11-09 MN2	WT	delayed	33.1
2012-11-09 MN2	WT	delayed	58.1
2012-11-09 MN2	WT	delayed	95.7
2012-11-09 MN2	WT	delayed	12.2
2012-11-09 MN2	WT	delayed	16
2012-11-09 MN2	WT	delayed	162.2
2012-11-09 MN2	WT	delayed	39.2
2012-11-09 MN2	WT	delayed	214.9
2012-11-09 MN2	WT	delayed	81
2012-11-09 MN2	WT	delayed	95.1
2012-11-09 MN2	WT	delayed	215.5
2012-11-09 MN2	WT	delayed	17.1
2012-11-09 MN2	WT	delayed	35.2
2012-11-09 MN2	WT	delayed	24.5
2012-11-09 MN2	WT	delayed	205.7
2012-11-09 MN2	WT	delayed	238.9
2012-11-09 MN2	WT	delayed	70.4
2012-11-09 MN2	WT	delayed	63.3
2012-11-09 MN2	WT	delayed	22.7
2012-11-09 MN2	WT	delayed	74.6
2012-11-09 MN2	WT	delayed	85.9
2012-11-09 MN2	WT	delayed	18.7
2012-11-09 MN2	WT	delayed	330.3
2012-11-09 MN2	WT	delayed	260.1
2012-11-09 MN2	WT	delayed	65.2
2012-11-09 MN2	WT	delayed	96.1
2012-11-09 MN2	WT	delayed	259.3
2012-11-09 MN2	WT	delayed	8.6
2012-11-09 MN2	WT	delayed	74.1
2012-11-09 MN2	WT	delayed	275.3
2012-11-09 MN2	WT	delayed	79
2012-11-09 MN2	WT	delayed	103
2012-11-09 MN2	WT	delayed	21.6
2012-11-09 MN2	WT	delayed	125.4
2012-11-09 MN2	WT	delayed	49.1
2012-11-09 MN2	WT	delayed	56.6
2012-11-09 MN2	WT	delayed	89.6
2012-11-09 MN2	WT	delayed	57.7
2012-11-09 MN2	WT	delayed	146.1
2012-11-09 MN2	WT	delayed	23.5
2012-11-09 MN2	WT	delayed	348.2
2012-11-09 MN2	WT	delayed	98.3
2012-11-09 MN2	WT	delayed	54.6
2012-11-09 MN2	WT	delayed	25.7
2012-11-09 MN2	WT	delayed	29.2
2012-11-09 MN2	WT	delayed	16.9
2012-11-09 MN2	WT	delayed	105.3
2012-11-09 MN2	WT	delayed	216.6
2012-11-09 MN2	WT	delayed	160.7
2012-11-09 MN2	WT	delayed	228.8
2012-11-09 MN2	WT	delayed	233.8
2012-11-09 MN2	WT	delayed	59.1
2012-11-09 MN2	WT	delayed	51.7
2012-11-09 MN2	WT	delayed	95.2
2012-11-09 MN2	WT	delayed	156.2
2012-11-09 MN2	WT	delayed	77.3
2012-11-09 MN2	WT	delayed	39.4
2012-11-09 MN2	WT	delayed	139.3
2012-11-09 MN2	WT	delayed	102.3
2012-11-09 MN2	WT	delayed	65.3
2012-11-09 MN2	WT	delayed	25.5
2012-11-09 MN2	WT	delayed	22.4
2012-11-09 MN2	WT	delayed	27.2
2012-11-09 MN2	WT	delayed	79.1
2012-11-09 MN2	WT	delayed	126.7
2012-11-09 MN2	WT	delayed	190
2012-11-09 MN2	WT	delayed	50.7
2012-11-09 MN2	WT	delayed	162
2012-11-09 MN2	WT	delayed	30.2
2012-11-09 MN2	WT	delayed	256.9
2012-11-09 MN2	WT	delayed	269
2012-11-09 MN2	WT	delayed	69.2
2012-11-09 MN2	WT	delayed	107
2012-11-09 MN2	WT	delayed	63.2
2012-11-09 MN2	WT	delayed	95.9
2012-11-09 MN2	WT	delayed	134.3
2012-11-09 MN2	WT	delayed	62.4
2012-11-09 MN2	WT	delayed	23.8
2012-11-09 MN2	WT	delayed	45.8
2012-11-09 MN2	WT	delayed	40.1
2012-11-09 MN2	WT	delayed	171.3
2012-11-09 MN2	WT	delayed	132.7
2012-11-09 MN2	WT	delayed	43
2012-11-09 MN2	WT	delayed	128.1
2012-11-09 MN2	WT	delayed	128.8
2012-11-09 MN2	WT	delayed	4.9
2012-11-09 MN2	WT	delayed	66
2012-11-14 MN1	WT	delayed	21
2012-11-14 MN1	WT	delayed	80.7
2012-11-14 MN1	WT	delayed	14.8
2012-11-14 MN1	WT	delayed	29.1
2012-11-14 MN1	WT	delayed	69
2012-11-14 MN1	WT	delayed	83.6
2012-11-14 MN1	WT	delayed	99.2
2012-11-14 MN1	WT	delayed	16.4
2012-11-14 MN1	WT	delayed	32
2012-11-14 MN1	WT	delayed	45.9
2012-11-14 MN1	WT	delayed	20.2
2012-11-14 MN1	WT	delayed	23.8
2012-11-14 MN1	WT	delayed	31
2012-11-14 MN1	WT	delayed	215.6
2012-11-14 MN1	WT	delayed	105.4
2012-11-14 MN1	WT	delayed	146.3
2012-11-14 MN1	WT	delayed	37.6
2012-11-14 MN1	WT	delayed	41.5
2012-11-14 MN1	WT	delayed	59.1
2012-11-14 MN1	WT	delayed	98.7
2012-11-14 MN1	WT	delayed	125
2012-11-14 MN1	WT	delayed	95.1
2012-11-14 MN1	WT	delayed	12.8
2012-11-14 MN1	WT	delayed	74.1
2012-11-14 MN1	WT	delayed	61
2012-11-14 MN1	WT	delayed	43.4
2012-11-14 MN1	WT	delayed	36
2012-11-14 MN1	WT	delayed	200.2
2012-11-14 MN1	WT	delayed	70.3
2012-11-14 MN1	WT	delayed	21.3
2012-11-14 MN1	WT	delayed	146.1
2012-11-14 MN1	WT	delayed	82.8
2012-11-14 MN1	WT	delayed	35.1
2012-11-14 MN1	WT	delayed	33.9
2012-11-14 MN1	WT	delayed	40
2012-11-14 MN1	WT	delayed	20.3
2012-11-14 MN1	WT	delayed	156.1
2012-11-14 MN1	WT	delayed	42.8
2012-11-14 MN1	WT	delayed	68.8
2012-11-14 MN1	WT	delayed	81.2
2012-11-14 MN1	WT	delayed	120.4
2012-11-14 MN1	WT	delayed	123.1
2012-11-14 MN1	WT	delayed	121.3
2012-11-14 MN1	WT	delayed	116.4
2012-11-14 MN1	WT	delayed	45.8
2012-11-14 MN1	WT	delayed	11.5
2012-11-14 MN1	WT	delayed	16.7
2012-11-14 MN1	WT	delayed	160.5
2012-11-14 MN1	WT	delayed	7.4
2012-11-14 MN1	WT	delayed	38.6
2012-11-14 MN1	WT	delayed	147.8
2012-11-14 MN1	WT	delayed	80.3
2012-11-14 MN1	WT	delayed	154.9
2012-11-14 MN1	WT	delayed	35.6
2012-11-14 MN1	WT	delayed	114.1
2012-11-14 MN1	WT	delayed	26.1
2012-11-14 MN1	WT	delayed	36.6
2012-11-14 MN1	WT	delayed	26.6
2012-11-14 MN1	WT	delayed	31.2
2012-11-14 MN1	WT	delayed	77.3
2012-11-14 MN1	WT	delayed	23.4
2012-11-14 MN1	WT	delayed	68.1
2012-11-14 MN1	WT	delayed	159.4
2012-11-14 MN1	WT	delayed	25.3
2012-11-14 MN1	WT	delayed	34.4
2012-11-14 MN1	WT	delayed	25.8
2012-11-14 MN1	WT	delayed	7.3
2012-11-14 MN1	WT	delayed	7.9
2012-11-14 MN1	WT	delayed	32.8
2012-11-14 MN1	WT	delayed	25.8
2012-11-14 MN1	WT	delayed	12.4
2012-11-14 MN1	WT	delayed	47
2012-11-14 MN1	WT	delayed	150.7
2012-11-14 MN1	WT	delayed	63.5
2012-11-14 MN1	WT	delayed	68.3
2012-11-14 MN1	WT	delayed	3.7
2012-11-14 MN1	WT	delayed	48.3
2012-11-14 MN1	WT	delayed	71.4
2012-11-14 MN1	WT	delayed	21.3
2012-11-14 MN1	WT	delayed	455.2
2012-11-14 MN1	WT	delayed	51.5
2012-11-14 MN1	WT	delayed	213.2
2012-11-14 MN1	WT	delayed	154.9
2012-11-14 MN1	WT	delayed	31.5
2012-11-14 MN1	WT	delayed	201.8
2012-11-14 MN1	WT	delayed	106.3
2012-11-14 MN1	WT	delayed	51.2
2012-11-14 MN1	WT	delayed	44.6
2012-11-14 MN1	WT	delayed	142.7
2012-11-14 MN1	WT	delayed	26.1
2012-11-14 MN1	WT	delayed	50.2
2012-11-14 MN1	WT	delayed	32.3
2012-11-14 MN1	WT	delayed	199.8
2012-11-14 MN1	WT	delayed	57.5
2012-11-14 MN1	WT	delayed	48
2012-11-14 MN1	WT	delayed	172.8
2012-11-14 MN1	WT	delayed	37.6
2012-11-14 MN1	WT	delayed	104.3
2012-11-14 MN1	WT	delayed	11.6
2012-11-14 MN1	WT	delayed	113.8
2012-11-14 MN1	WT	delayed	31.1
2012-11-14 MN1	WT	delayed	70.8
2012-11-14 MN1	WT	delayed	5.1
2012-11-14 MN1	WT	delayed	17.7
2012-11-14 MN1	WT	delayed	64.8
2012-11-14 MN1	WT	delayed	156.6
2012-11-14 MN1	WT	delayed	13.6
2012-11-14 MN1	WT	delayed	27.5
2012-11-14 MN1	WT	delayed	49.1
2012-11-14 MN1	WT	delayed	52
2012-11-14 MN1	WT	delayed	45.3
2012-11-14 MN1	WT	delayed	15.8
2012-11-14 MN1	WT	delayed	154.6
2012-11-14 MN1	WT	delayed	74.4
2012-11-14 MN1	WT	delayed	24.4
2012-11-14 MN1	WT	delayed	3.8
2012-11-14 MN1	WT	delayed	168.3
2012-11-14 MN1	WT	delayed	277.9
2012-11-14 MN1	WT	delayed	154.8
2012-11-14 MN1	WT	delayed	10.9
2012-11-14 MN1	WT	delayed	11.5
2012-11-14 MN1	WT	delayed	82
2012-11-14 MN1	WT	delayed	25.6
2012-11-14 MN1	WT	delayed	43.2
2012-11-14 MN1	WT	delayed	28.3
2012-11-14 MN1	WT	delayed	24.3
2012-11-14 MN1	WT	delayed	28.3
2012-11-14 MN1	WT	delayed	17.9
2012-11-14 MN1	WT	delayed	46.2
2012-11-14 MN1	WT	delayed	133.8
2012-11-14 MN1	WT	delayed	62.7
2012-11-14 MN1	WT	delayed	63.5
2012-11-14 MN1	WT	delayed	18.9
2012-11-14 MN1	WT	delayed	49.4
2012-11-14 MN1	WT	delayed	82.6
2012-11-14 MN1	WT	delayed	5.1
2012-11-14 MN2	WT	immediate	27.4
2012-11-14 MN2	WT	immediate	8.2
2012-11-14 MN2	WT	immediate	37.8
2012-11-14 MN2	WT	immediate	155.8
2012-11-14 MN2	WT	immediate	143.4
2012-11-14 MN2	WT	immediate	60.7
2012-11-14 MN2	WT	immediate	20
2012-11-14 MN2	WT	immediate	148.3
2012-11-14 MN2	WT	immediate	310.9
2012-11-14 MN2	WT	immediate	73.7
2012-11-14 MN2	WT	immediate	20.4
2012-11-14 MN2	WT	immediate	9
2012-11-14 MN2	WT	immediate	2.2
2012-11-14 MN2	WT	immediate	73.3
2012-11-14 MN2	WT	immediate	81
2012-11-14 MN2	WT	immediate	88.8
2012-11-14 MN2	WT	immediate	2.2
2012-11-14 MN2	WT	immediate	108.6
2012-11-14 MN2	WT	immediate	204.2
2012-11-14 MN2	WT	immediate	60.3
2012-11-14 MN2	WT	immediate	77
2012-11-14 MN2	WT	immediate	55.4
2012-11-14 MN2	WT	immediate	202.4
2012-11-14 MN2	WT	immediate	181.7
2012-11-14 MN2	WT	immediate	236.7
2012-11-14 MN2	WT	immediate	107
2012-11-14 MN2	WT	immediate	58.9
2012-11-14 MN2	WT	immediate	16.1
[truncated: 1,795 more rows]
