# Supplementary figures and images for: Early intrinsic hyperexcitability does not contribute to motoneuron degeneration in amyotrophic lateral sclerosis
Source: eLife journal article supplement (doi:10.7554/elife.04046), 2014-10-14

A

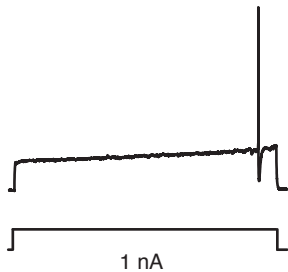

B

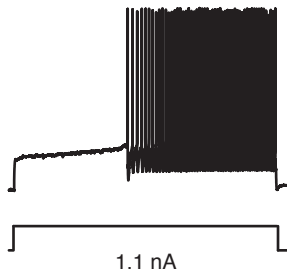

C

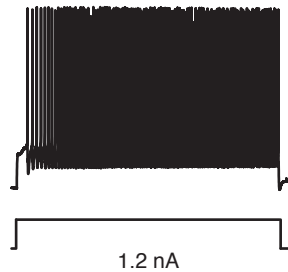

D

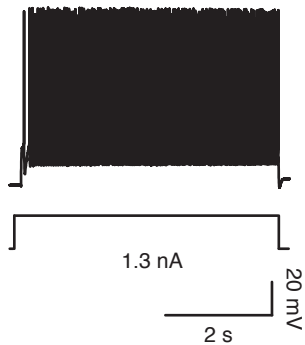

Supplement: supp [file elife_poa_e04046_Figure_1_figure_supplement_1.pdf › elife_poa_e04046_Figure_1_figure_supplement_1.pdf]

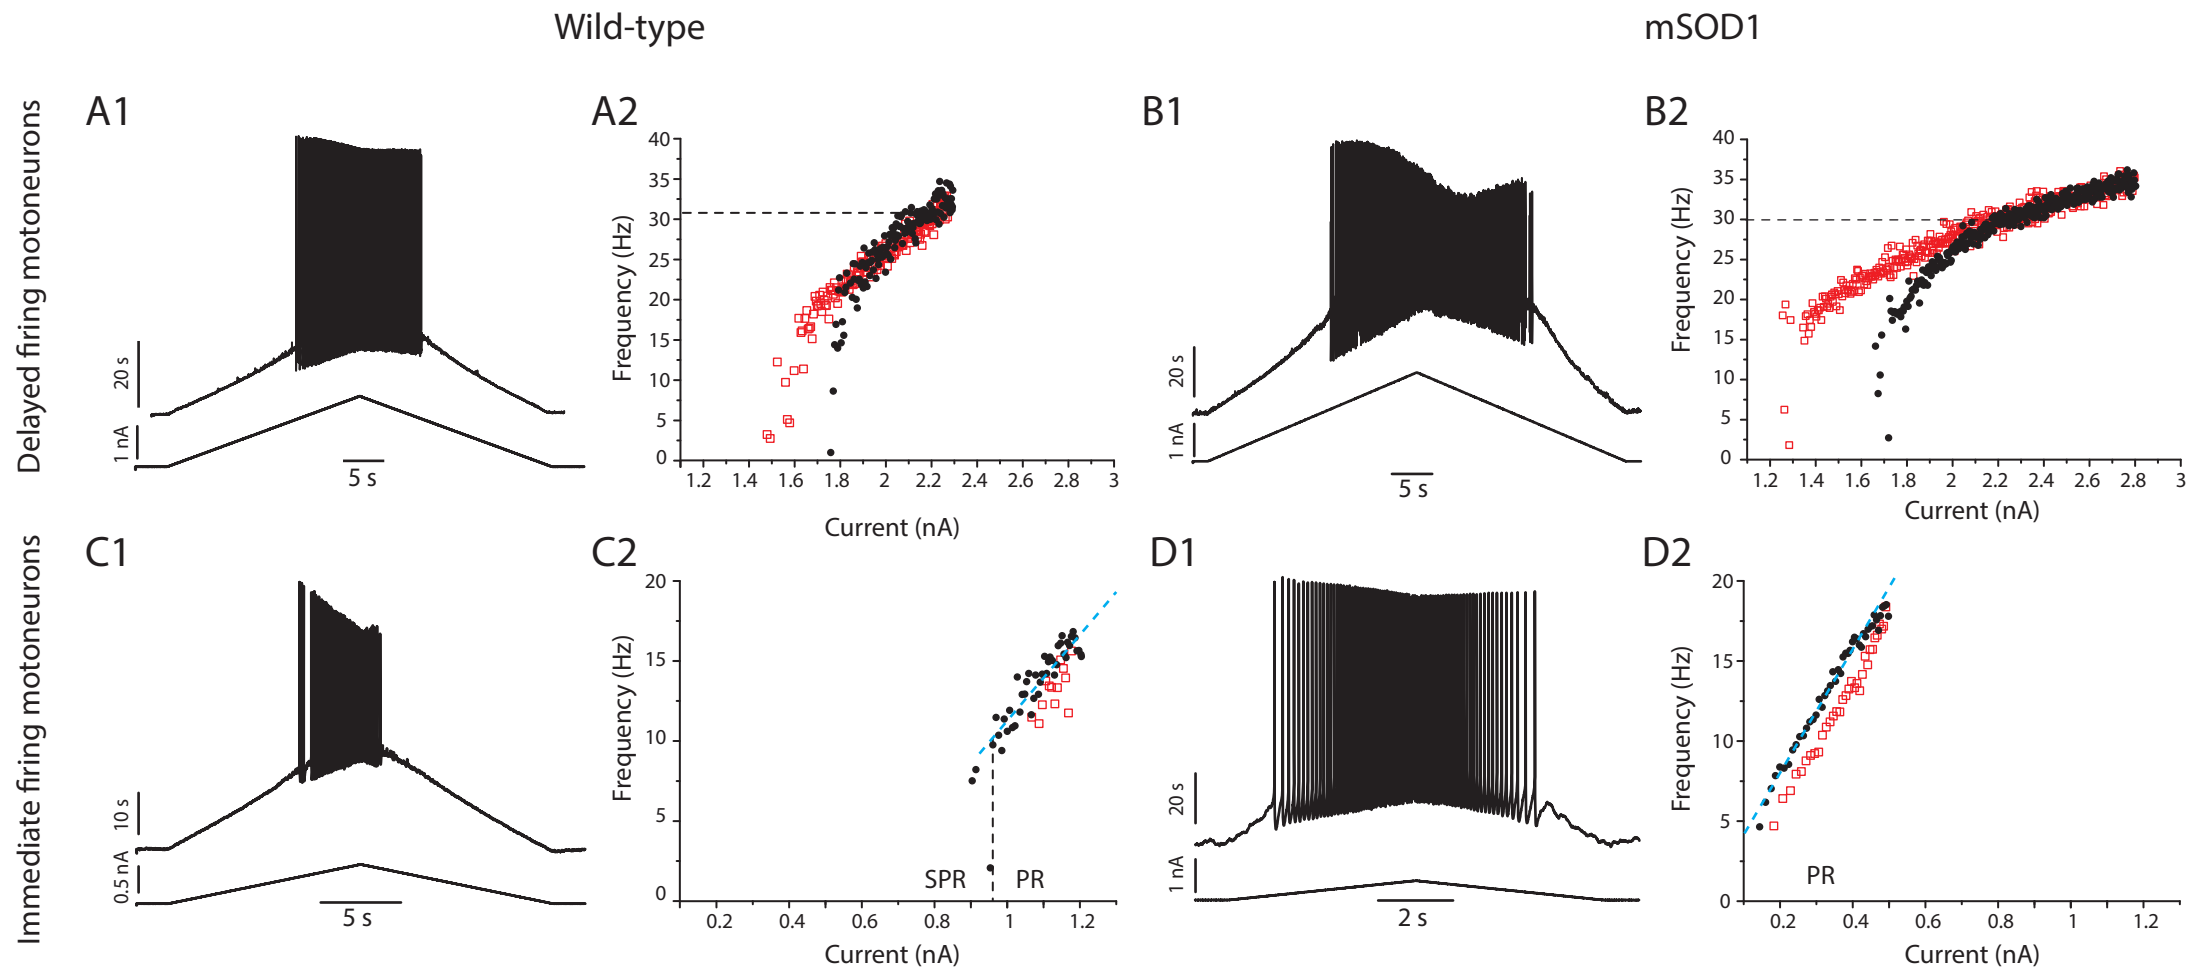

Supplement: supp [file elife_poa_e04046_Figure_7_figure_supplement_1.pdf › elife_poa_e04046_Figure_7_figure_supplement_1.pdf]
